# Supplementary material for: Maleimide as an efficient nucleophilic partner in the aza-Morita–Baylis–Hillman reaction: synthesis of chiral 3-substituted-3-aminooxindoles
Source: Royal Society of Chemistry journal article supplement (doi:10.1039/c5ob00182j), 2015-01-01

*Supporting Information*

**Maleimide as efficient nucleophilic partner in *aza*-Morita-Baylis-Hillman reaction: Synthesis of chiral 3-substituted-3-aminooxindoles**

Akshay Kumar, Vivek Sharma, Jasneet Kaur, Naveen Kumar and Swapandeeep Singh Chimni\*

Department of Chemistry, U.G.C. Centre of Advance Studies in Chemistry, Guru Nanak Dev University, Amritsar, 143005, India,

Fax: (+)91-183-2258820

E-mail: [sschimni@yahoo.com](mailto:sschimni@yahoo.com), [sschimni.chem@gndu.ac.in](mailto:sschimni.chem@gndu.ac.in)

**Table of content**

|                                               |       |
|-----------------------------------------------|-------|
| (1) Materials.....                            | 2     |
| (2) Crystal data for enantiopure product..... | 2-5   |
| (3) HPLC chromatograms.....                   | 5-23  |
| (4) NMR spectra.....                          | 24-61 |

## 1 Material:

Catalysts **CN**, **CD**, **QN** and **QD** were purchased from Sigma Aldrich. The catalysts **I**, **II**, **III** and **IV** were synthesized by the procedures reported in literature.<sup>1</sup> Isatins were purchased from Spectrochem, India. The *N*-methyl, *N*-allyl or *N*-benzyl protected isatins and their imines were prepared according to the literature method.<sup>2</sup> Maleimides **1a**, **1f**, **1c** were purchased from Sigma Aldrich. Maleimides **1b**, **1d** and **1e** were synthesized by following the known literature procedure.<sup>3</sup>

## (2) Crystal data for enantiopure product (3g)

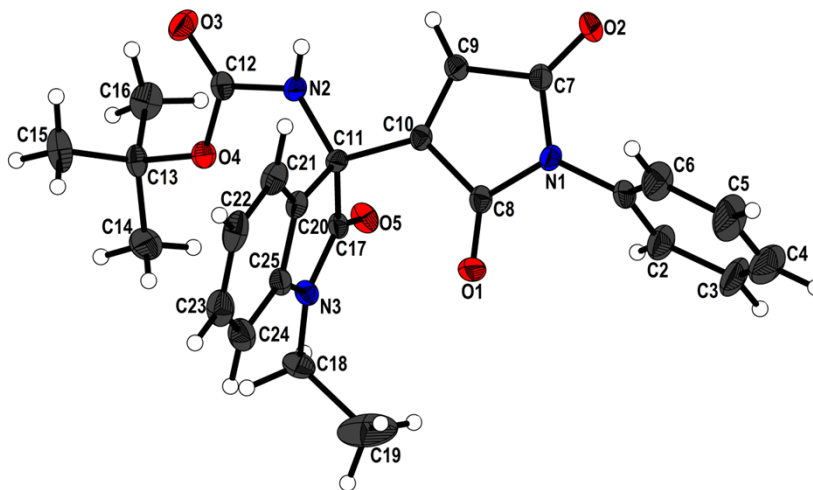

<sup>1</sup> (a) H. Li, Y. Wang, L. Tang and L. Deng, *J. Am. Chem. Soc.* 2004, **126**, 9906; (b) H. Li, B. Wang and L. Deng, *J. Am. Chem. Soc.* 2006, **128**, 732; (c) Y. Wang, X. Liu and L. Deng, *J. Am. Chem. Soc.*, 2006, **128**, 3928; (d) Y. Iwabuchi, M. Nakatani, N. Yokoyama and S. Hatakeyama, *J. Am. Chem. Soc.*, 1999, **121**, 10219; (e) V. Vakulya, S. Varga, A. Csámpai and T. Soos, *Org. Lett.*, 2005, **7**, 1967.

<sup>2</sup> (a) L.E. Overman and E. A. Peterson, *Tetrahedron.*, 2003, **59**, 6905; (b) W. Yan, D. Wang, J. Feng, P. Li, D. Zhao and R. Wang, *Org. Lett.*, 2012, **14**, 2512.

<sup>3</sup> N. Matuszak, G. G. Muccioli, G. Labar and D. M. Lambert, *J. Med. Chem.* 2009, **52**, 7410.

|                                                     |                                                               |
|-----------------------------------------------------|---------------------------------------------------------------|
| <b>Chemical formula</b>                             | C <sub>25</sub> H <sub>25</sub> N <sub>3</sub> O <sub>5</sub> |
| <b>Formula Mass</b>                                 | 447.48                                                        |
| <b>Crystal system</b>                               | Monoclinic                                                    |
| <b>Colour</b>                                       | Colourless                                                    |
| <b>a/Å</b>                                          | 10.903(4)                                                     |
| <b>b/Å</b>                                          | 8.978(3)                                                      |
| <b>c/Å</b>                                          | 13.171(5)                                                     |
| <b><math>\alpha</math>/°</b>                        | 90.00                                                         |
| <b><math>\beta</math>/°</b>                         | 108.452(12)                                                   |
| <b><math>\gamma</math>/°</b>                        | 90.00                                                         |
| <b>Unit cell volume/Å<sup>3</sup></b>               | 1223.0(8)                                                     |
| <b>Temperature/K</b>                                | 296(2)                                                        |
| <b>Space group</b>                                  | P 21                                                          |
| <b>No. of formula units per unit cell, Z</b>        | 2                                                             |
| <b>No. of reflections measured</b>                  | 1297                                                          |
| <b>Final <math>R_I</math> values (all data)</b>     | 0.1339                                                        |
| <b>Final <math>wR(F^2)</math> values (all data)</b> | 0.2062                                                        |

|                                            |         |
|--------------------------------------------|---------|
| <b>Goodness of fit on <math>F^2</math></b> | 0.973   |
| <b>Flack parameter</b>                     | -1(2)   |
| <b>CCDC number</b>                         | 1037308 |

==== Shimadzu LCsolution Analysis Report ====

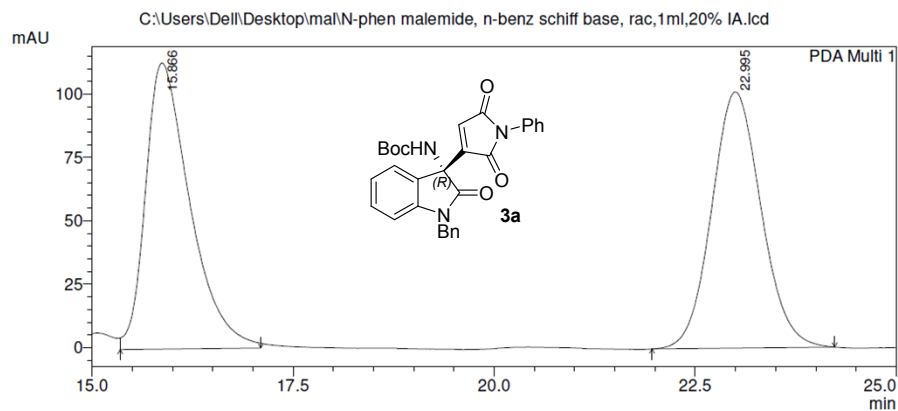

PeakTable

| Peak# | Ret. Time | Area    | Height | Area %  | Height % |
|-------|-----------|---------|--------|---------|----------|
| 1     | 15.866    | 4332043 | 112840 | 49.999  | 52.753   |
| 2     | 22.995    | 4332211 | 101063 | 50.001  | 47.247   |
| Total |           | 8664253 | 213903 | 100.000 | 100.000  |

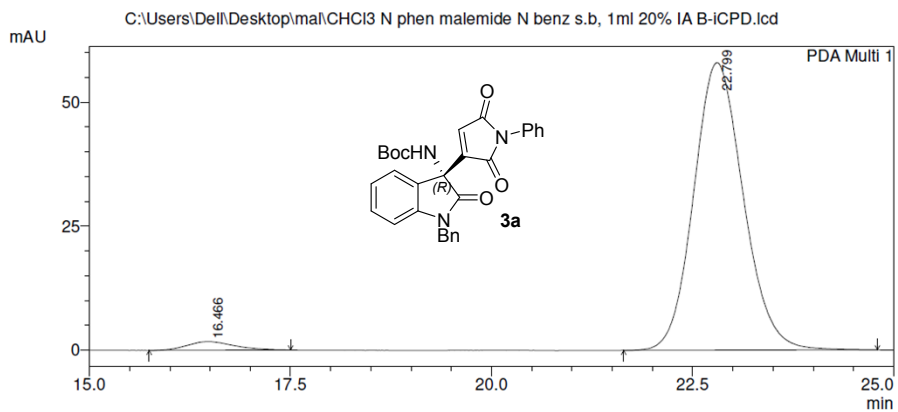

PeakTable

| Peak# | Ret. Time | Area    | Height | Area %  | Height % |
|-------|-----------|---------|--------|---------|----------|
| 1     | 16.466    | 70005   | 1724   | 2.738   | 2.888    |
| 2     | 22.799    | 2487205 | 57988  | 97.262  | 97.112   |
| Total |           | 2557211 | 59712  | 100.000 | 100.000  |

==== Shimadzu LCsolution Analysis Report ====

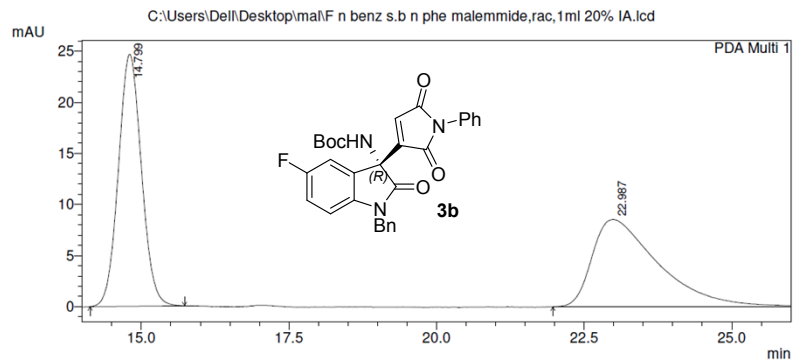

PeakTable

| Peak# | Ret. Time | Area    | Height | Area %  | Height % |
|-------|-----------|---------|--------|---------|----------|
| 1     | 14.799    | 670919  | 24664  | 50.023  | 74.247   |
| 2     | 22.987    | 670316  | 8555   | 49.977  | 25.753   |
| Total |           | 1341235 | 33219  | 100.000 | 100.000  |

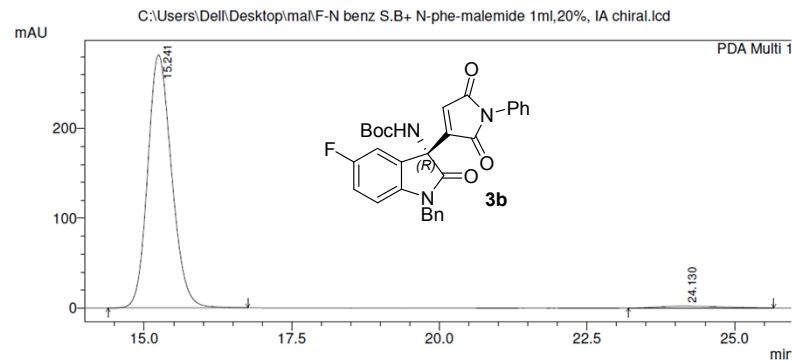

PeakTable

| Peak# | Ret. Time | Area    | Height | Area %  | Height % |
|-------|-----------|---------|--------|---------|----------|
| 1     | 15.241    | 7945854 | 281982 | 98.283  | 99.311   |
| 2     | 24.130    | 138819  | 1956   | 1.717   | 0.689    |
| Total |           | 8084673 | 283937 | 100.000 | 100.000  |

==== Shimadzu LCsolution Analysis Report ====

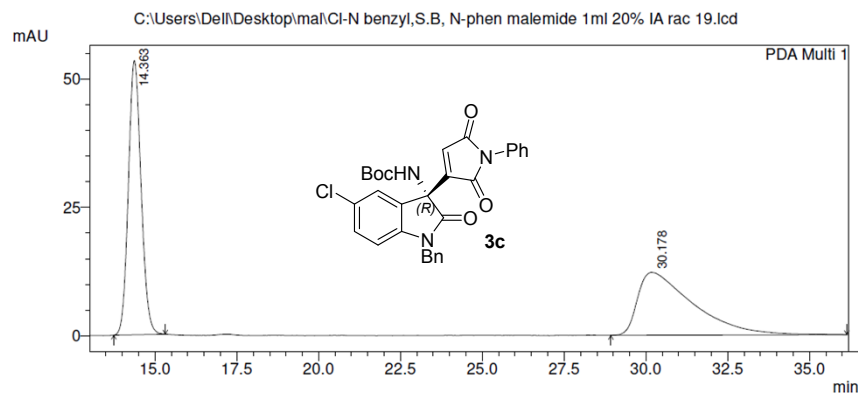

PeakTable

| Peak# | Ret. Time | Area    | Height | Area %  | Height % |
|-------|-----------|---------|--------|---------|----------|
| 1     | 14.363    | 1441856 | 53391  | 50.079  | 81.363   |
| 2     | 30.178    | 1437304 | 12230  | 49.921  | 18.637   |
| Total |           | 2879160 | 65621  | 100.000 | 100.000  |

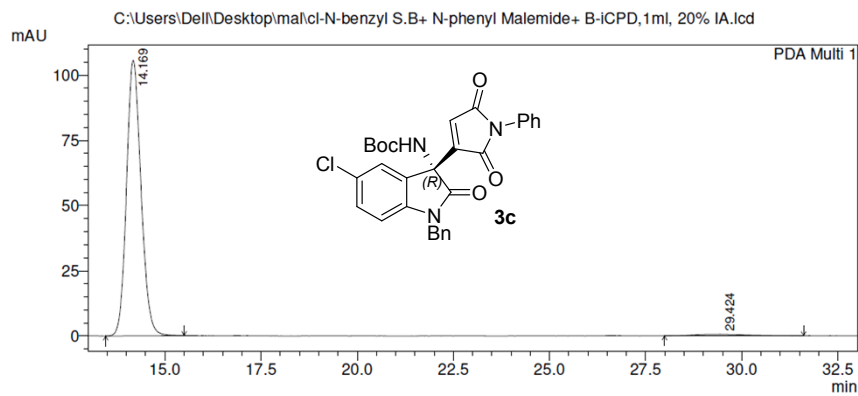

PeakTable

| Peak# | Ret. Time | Area    | Height | Area %  | Height % |
|-------|-----------|---------|--------|---------|----------|
| 1     | 14.169    | 2769780 | 105682 | 98.012  | 99.430   |
| 2     | 29.424    | 56181   | 605    | 1.988   | 0.570    |
| Total |           | 2825960 | 106288 | 100.000 | 100.000  |

==== Shimadzu LCsolution Analysis Report ====

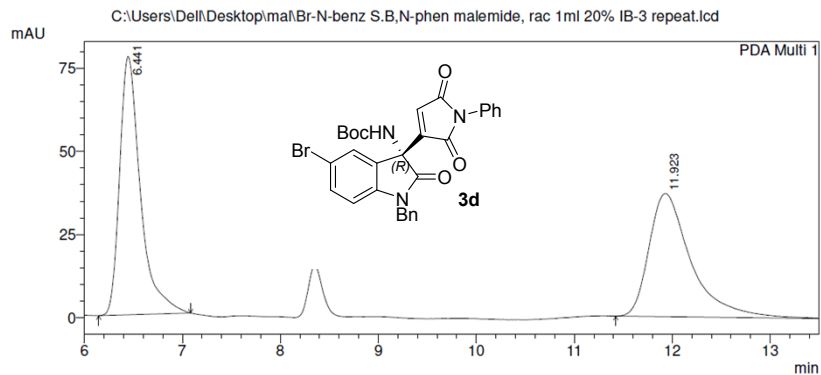

PeakTable

| Peak# | Ret. Time | Area    | Height | Area %  | Height % |
|-------|-----------|---------|--------|---------|----------|
| 1     | 6.441     | 1145246 | 77578  | 51.017  | 67.736   |
| 2     | 11.923    | 1099605 | 36952  | 48.983  | 32.264   |
| Total |           | 2244851 | 114530 | 100.000 | 100.000  |

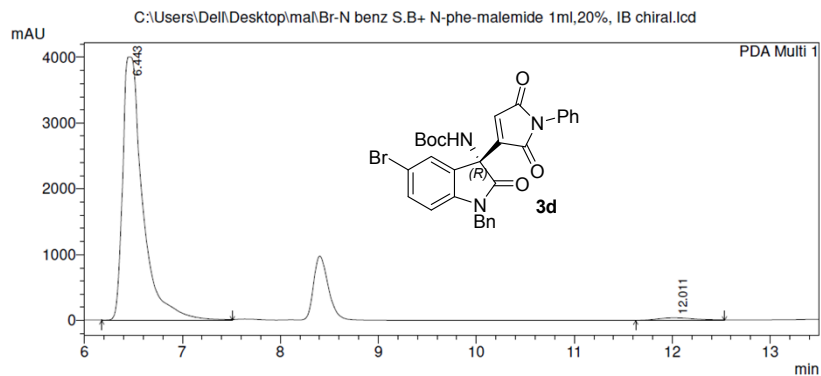

PeakTable

| Peak# | Ret. Time | Area     | Height  | Area %  | Height % |
|-------|-----------|----------|---------|---------|----------|
| 1     | 6.443     | 57101482 | 3998072 | 97.904  | 98.963   |
| 2     | 12.011    | 1222519  | 41909   | 2.096   | 1.037    |
| Total |           | 58324001 | 4039980 | 100.000 | 100.000  |



==== Shimadzu LCsolution Analysis Report ====

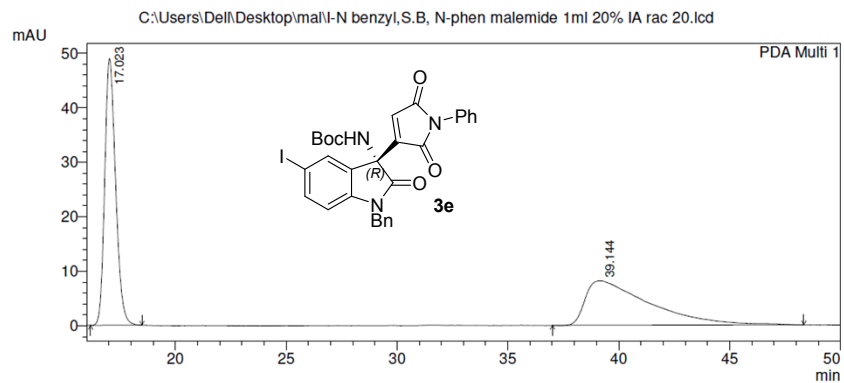

1 PDA Multi 1/254nm 4nm

PeakTable

PDA Ch1 254nm 4nm

| Peak# | Ret. Time | Area    | Height | Area %  | Height % |
|-------|-----------|---------|--------|---------|----------|
| 1     | 17.023    | 1666318 | 48923  | 50.475  | 85.705   |
| 2     | 39.144    | 1634959 | 8160   | 49.525  | 14.295   |
| Total |           | 3301277 | 57083  | 100.000 | 100.000  |

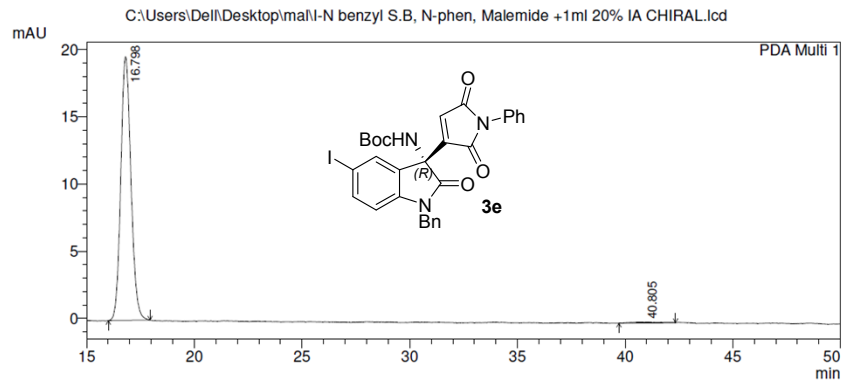

1 PDA Multi 1/254nm 4nm

PeakTable

PDA Ch1 254nm 4nm

| Peak# | Ret. Time | Area   | Height | Area %  | Height % |
|-------|-----------|--------|--------|---------|----------|
| 1     | 16.798    | 643402 | 19610  | 99.107  | 99.644   |
| 2     | 40.805    | 5796   | 70     | 0.893   | 0.356    |
| Total |           | 649198 | 19680  | 100.000 | 100.000  |

## ==== Shimadzu LCsolution Analysis Report ====

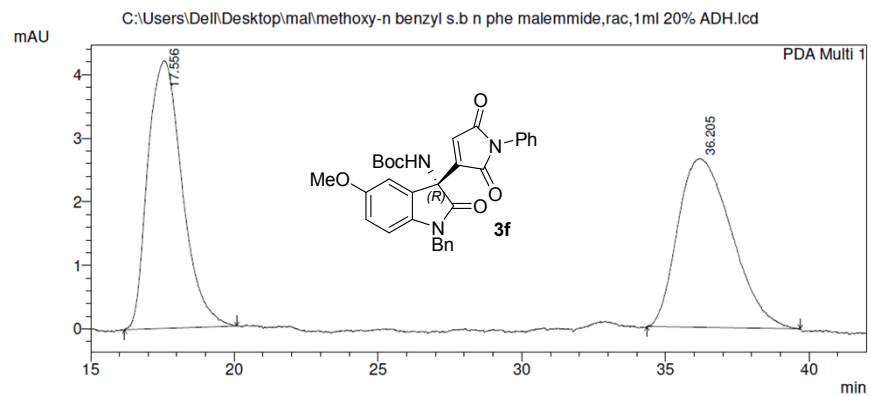

1 PDA Multi 1/254nm 4nm

PeakTable

| Peak# | Ret. Time | Area   | Height | Area %  | Height % |
|-------|-----------|--------|--------|---------|----------|
| 1     | 17.556    | 351514 | 4211   | 50.401  | 61.349   |
| 2     | 36.205    | 345921 | 2653   | 49.599  | 38.651   |
| Total |           | 697435 | 6864   | 100.000 | 100.000  |

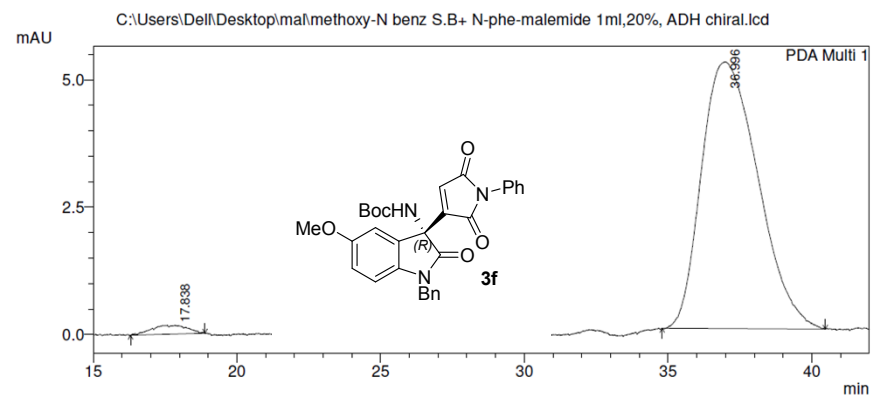

1 PDA Multi 1/254nm 4nm

PeakTable

| Peak# | Ret. Time | Area   | Height | Area %  | Height % |
|-------|-----------|--------|--------|---------|----------|
| 1     | 17.838    | 15143  | 175    | 2.068   | 3.232    |
| 2     | 36.996    | 717054 | 5236   | 97.932  | 96.768   |
| Total |           | 732197 | 5410   | 100.000 | 100.000  |

==== Shimadzu LCsolution Analysis Report ====

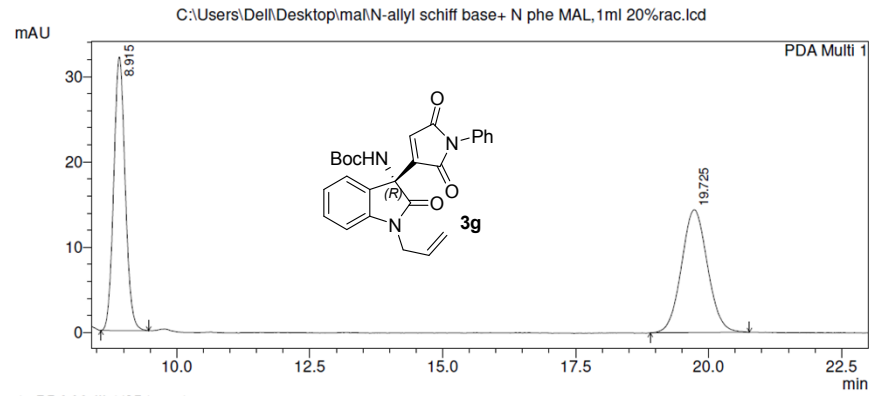

PeakTable

| Peak# | Ret. Time | Area   | Height | Area %  | Height % |
|-------|-----------|--------|--------|---------|----------|
| 1     | 8.915     | 481028 | 32043  | 49.582  | 69.019   |
| 2     | 19.725    | 489141 | 14383  | 50.418  | 30.981   |
| Total |           | 970168 | 46426  | 100.000 | 100.000  |

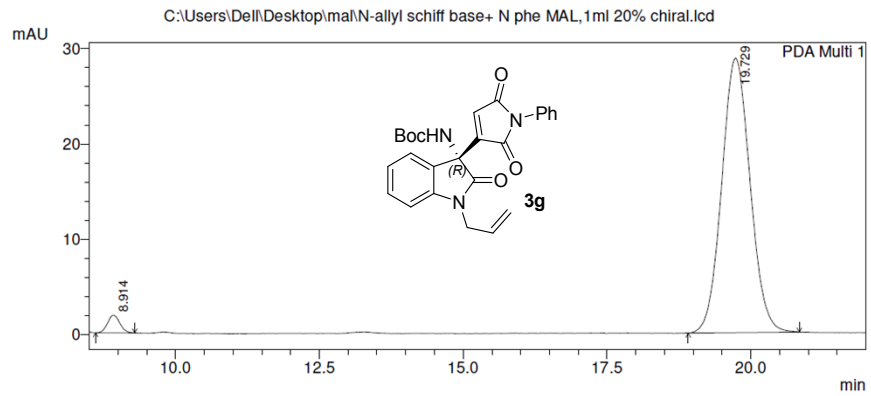

PeakTable

| Peak# | Ret. Time | Area    | Height | Area %  | Height % |
|-------|-----------|---------|--------|---------|----------|
| 1     | 8.914     | 27873   | 1873   | 2.738   | 6.103    |
| 2     | 19.729    | 990244  | 28810  | 97.262  | 93.897   |
| Total |           | 1018116 | 30682  | 100.000 | 100.000  |

==== Shimadzu LCsolution Analysis Report ====

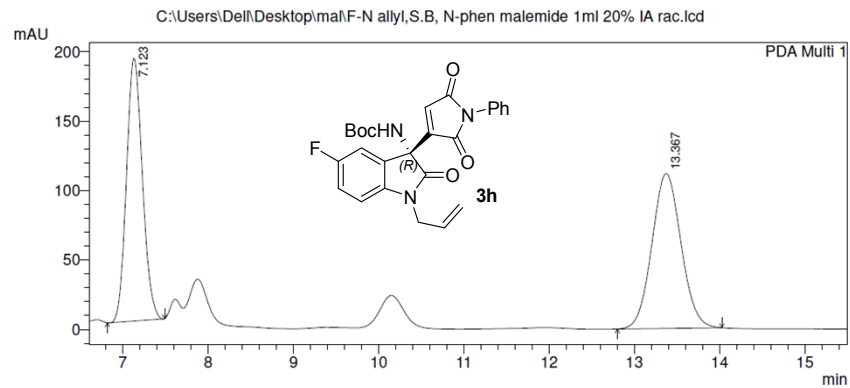

PeakTable

| Peak# | Ret. Time | Area    | Height | Area %  | Height % |
|-------|-----------|---------|--------|---------|----------|
| 1     | 7.123     | 2459628 | 189314 | 48.172  | 62.937   |
| 2     | 13.367    | 2646292 | 111485 | 51.828  | 37.063   |
| Total |           | 5105920 | 300799 | 100.000 | 100.000  |

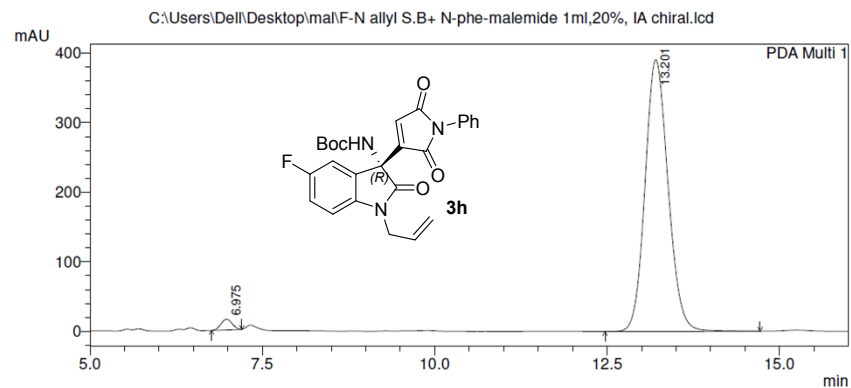

PeakTable

| Peak# | Ret. Time | Area    | Height | Area %  | Height % |
|-------|-----------|---------|--------|---------|----------|
| 1     | 6.975     | 171332  | 15177  | 1.853   | 3.742    |
| 2     | 13.201    | 9075589 | 390450 | 98.147  | 96.258   |
| Total |           | 9246922 | 405627 | 100.000 | 100.000  |

==== Shimadzu LCsolution Analysis Report ====

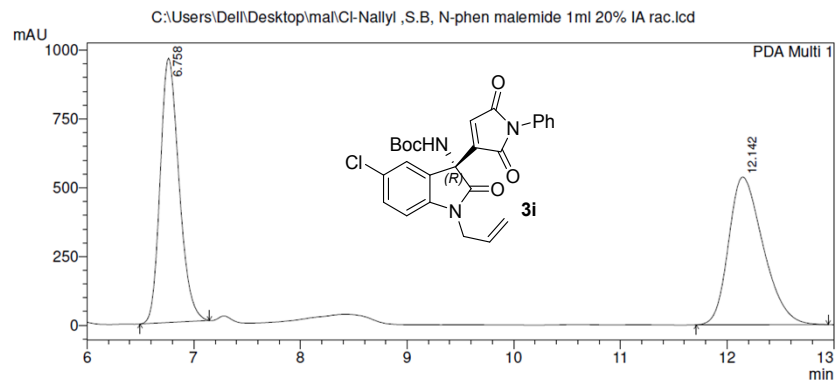

PeakTable

| Peak# | Ret. Time | Area     | Height  | Area %  | Height % |
|-------|-----------|----------|---------|---------|----------|
| 1     | 6.758     | 11828130 | 961421  | 49.410  | 64.166   |
| 2     | 12.142    | 12110451 | 536918  | 50.590  | 35.834   |
| Total |           | 23938581 | 1498339 | 100.000 | 100.000  |

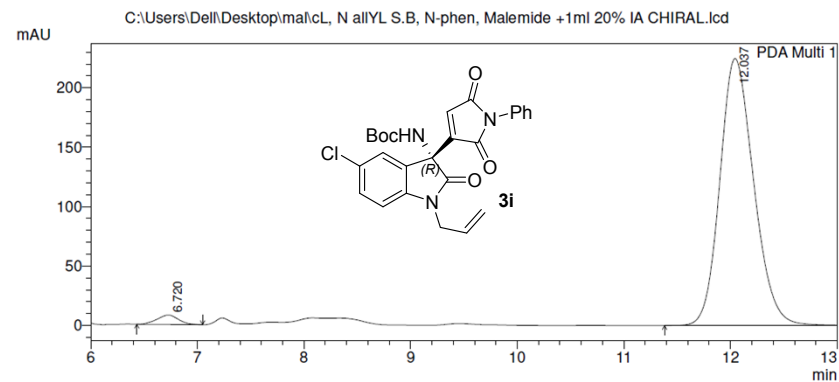

PeakTable

| Peak# | Ret. Time | Area    | Height | Area %  | Height % |
|-------|-----------|---------|--------|---------|----------|
| 1     | 6.720     | 112312  | 7958   | 2.211   | 3.419    |
| 2     | 12.037    | 4967065 | 224796 | 97.789  | 96.581   |
| Total |           | 5079377 | 232754 | 100.000 | 100.000  |

==== Shimadzu LCsolution Analysis Report ====

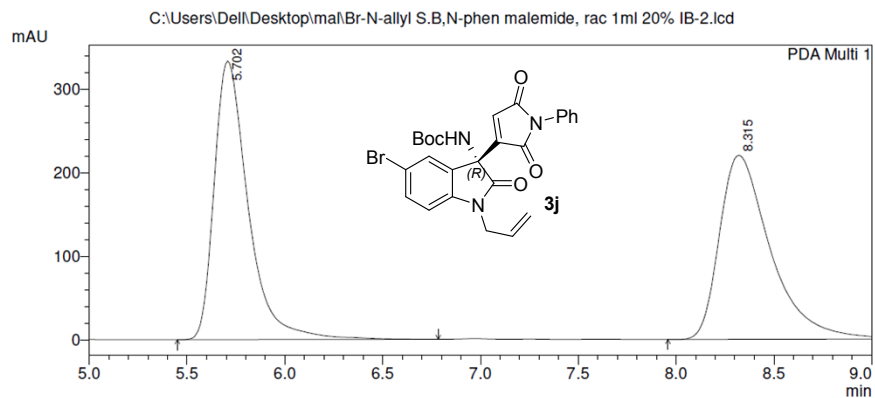

PeakTable

| Peak# | Ret. Time | Area    | Height | Area %  | Height % |
|-------|-----------|---------|--------|---------|----------|
| 1     | 5.702     | 4040444 | 333682 | 50.041  | 60.199   |
| 2     | 8.315     | 4033790 | 220612 | 49.959  | 39.801   |
| Total |           | 8074234 | 554294 | 100.000 | 100.000  |

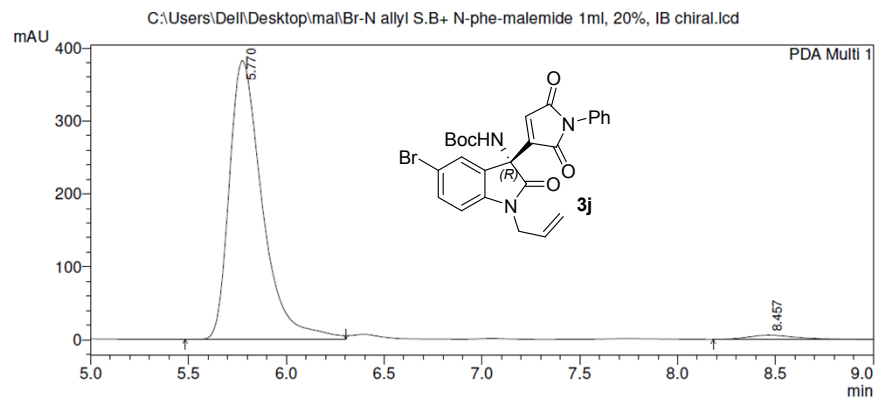

PeakTable

| Peak# | Ret. Time | Area    | Height | Area %  | Height % |
|-------|-----------|---------|--------|---------|----------|
| 1     | 5.770     | 4490964 | 381806 | 97.798  | 98.520   |
| 2     | 8.457     | 101129  | 5735   | 2.202   | 1.480    |
| Total |           | 4592093 | 387542 | 100.000 | 100.000  |

==== Shimadzu LCsolution Analysis Report ====

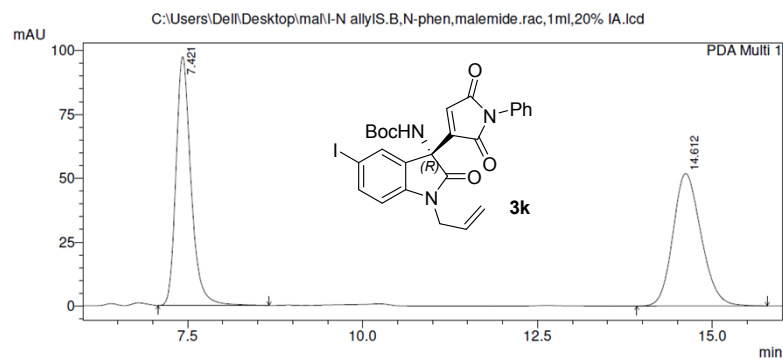

PeakTable

| Peak# | Ret. Time | Area    | Height | Area %  | Height % |
|-------|-----------|---------|--------|---------|----------|
| 1     | 7.421     | 1455262 | 97288  | 50.110  | 65.259   |
| 2     | 14.612    | 1448882 | 51792  | 49.890  | 34.741   |
| Total |           | 2904144 | 149080 | 100.000 | 100.000  |

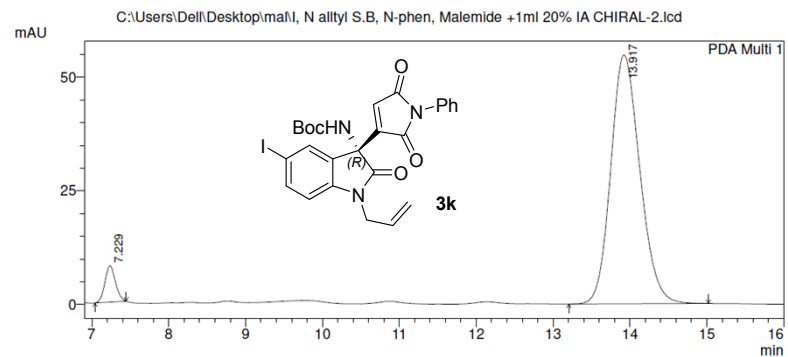

PeakTable

| Peak# | Ret. Time | Area    | Height | Area %  | Height % |
|-------|-----------|---------|--------|---------|----------|
| 1     | 7.229     | 76555   | 8019   | 5.033   | 12.760   |
| 2     | 13.917    | 1444445 | 54827  | 94.967  | 87.240   |
| Total |           | 1521001 | 62846  | 100.000 | 100.000  |

==== Shimadzu LCsolution Analysis Report ====

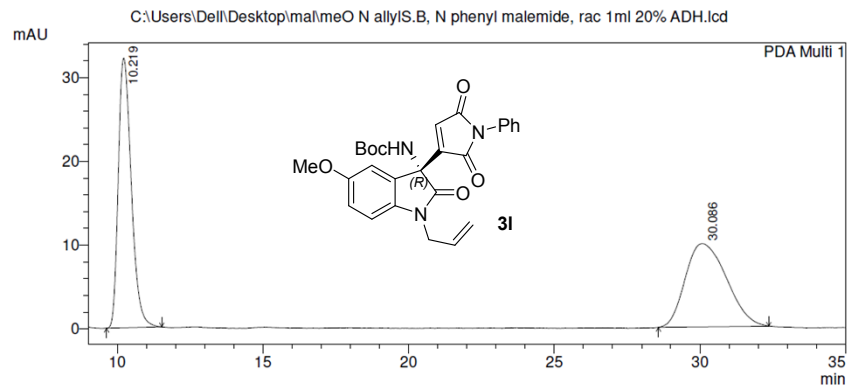

PeakTable

| Peak# | Ret. Time | Area    | Height | Area %  | Height % |
|-------|-----------|---------|--------|---------|----------|
| 1     | 10.219    | 1001640 | 32196  | 50.563  | 76.426   |
| 2     | 30.086    | 979342  | 9931   | 49.437  | 23.574   |
| Total |           | 1980983 | 42127  | 100.000 | 100.000  |

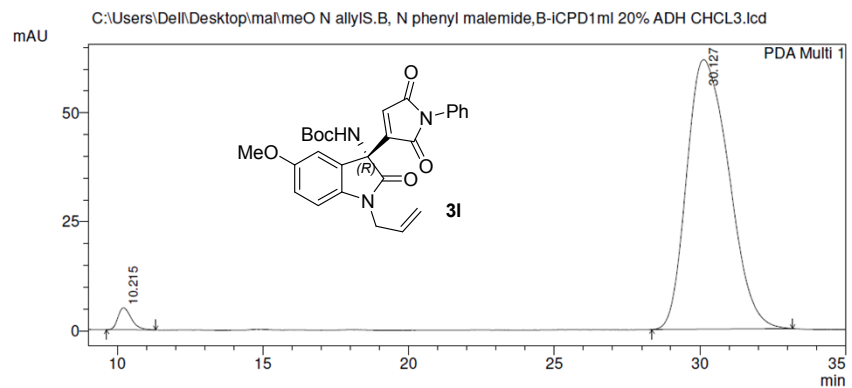

PeakTable

| Peak# | Ret. Time | Area    | Height | Area %  | Height % |
|-------|-----------|---------|--------|---------|----------|
| 1     | 10.215    | 159740  | 5015   | 2.498   | 7.500    |
| 2     | 30.127    | 6236185 | 61855  | 97.502  | 92.500   |
| Total |           | 6395925 | 66870  | 100.000 | 100.000  |



## ==== Shimadzu LCsolution Analysis Report ====

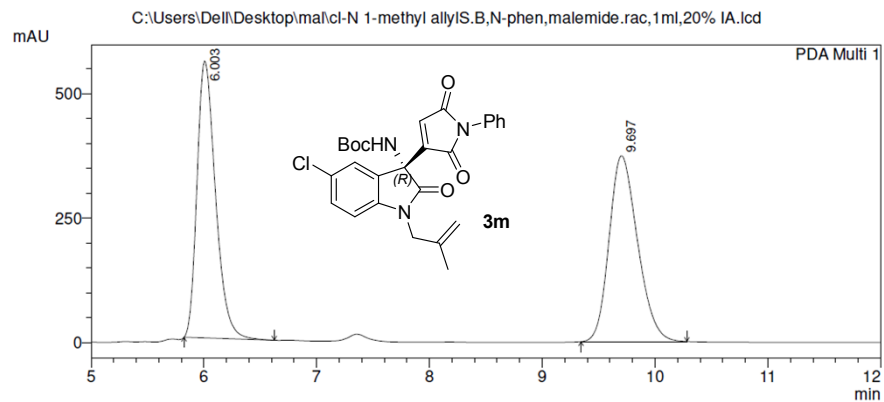

1 PDA Multi 1/254nm 4nm

PeakTable

PDA Ch1 254nm 4nm

| Peak# | Ret. Time | Area     | Height | Area %  | Height % |
|-------|-----------|----------|--------|---------|----------|
| 1     | 6.003     | 6342513  | 556636 | 49.191  | 59.848   |
| 2     | 9.697     | 6551226  | 373449 | 50.809  | 40.152   |
| Total |           | 12893740 | 930086 | 100.000 | 100.000  |

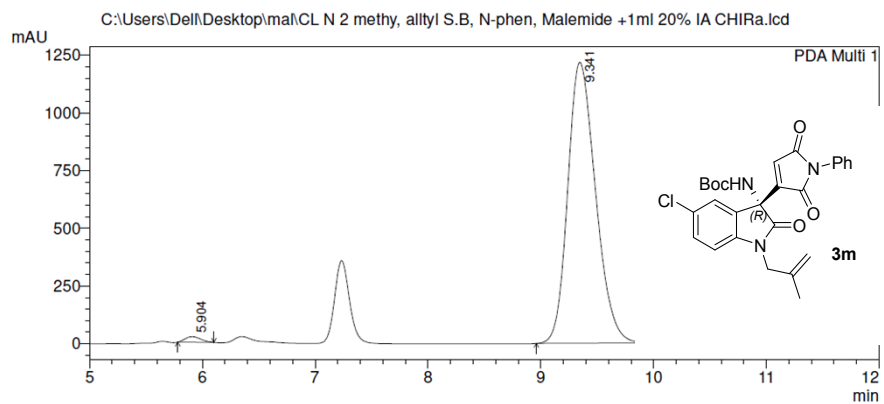

1 PDA Multi 1/218nm 4nm

PeakTable

PDA Ch1 218nm 4nm

| Peak# | Ret. Time | Area     | Height  | Area %  | Height % |
|-------|-----------|----------|---------|---------|----------|
| 1     | 5.904     | 232381   | 24279   | 1.102   | 1.956    |
| 2     | 9.341     | 20857470 | 1216986 | 98.898  | 98.044   |
| Total |           | 21089851 | 1241265 | 100.000 | 100.000  |

==== Shimadzu LCsolution Analysis Report ====

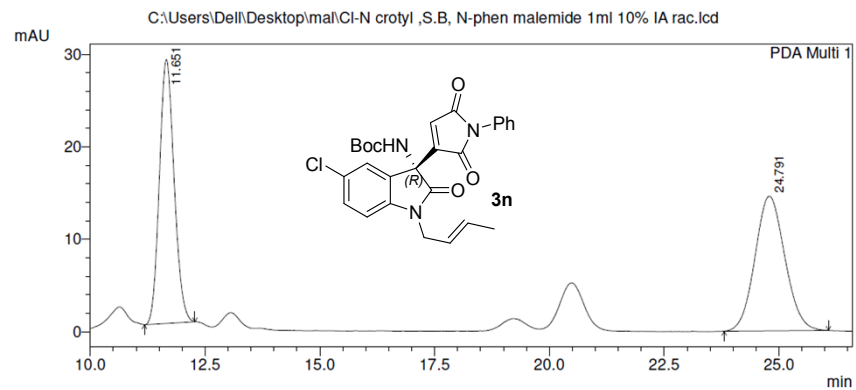

PeakTable

| Peak# | Ret. Time | Area    | Height | Area %  | Height % |
|-------|-----------|---------|--------|---------|----------|
| 1     | 11.651    | 638222  | 28584  | 49.150  | 66.204   |
| 2     | 24.791    | 660306  | 14592  | 50.850  | 33.796   |
| Total |           | 1298529 | 43175  | 100.000 | 100.000  |

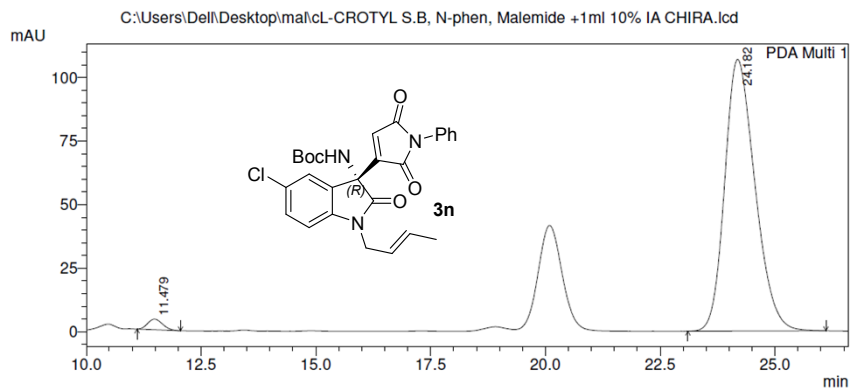

PeakTable

| Peak# | Ret. Time | Area    | Height | Area %  | Height % |
|-------|-----------|---------|--------|---------|----------|
| 1     | 11.479    | 94805   | 4199   | 1.890   | 3.779    |
| 2     | 24.182    | 4921714 | 106935 | 98.110  | 96.221   |
| Total |           | 5016520 | 111134 | 100.000 | 100.000  |

==== Shimadzu LCsolution Analysis Report ====

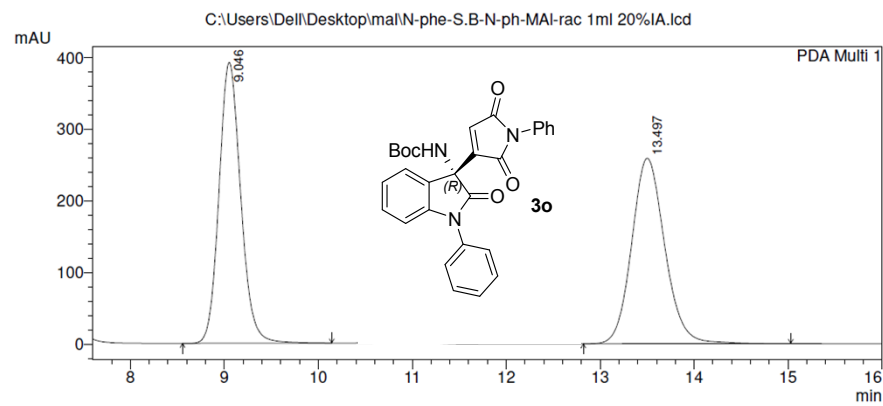

1 PDA Multi 1/254nm 4nm

PeakTable

PDA Ch1 254nm 4nm

| Peak# | Ret. Time | Area     | Height | Area %  | Height % |
|-------|-----------|----------|--------|---------|----------|
| 1     | 9.046     | 6309639  | 392533 | 49.861  | 60.225   |
| 2     | 13.497    | 6344713  | 259246 | 50.139  | 39.775   |
| Total |           | 12654351 | 651779 | 100.000 | 100.000  |

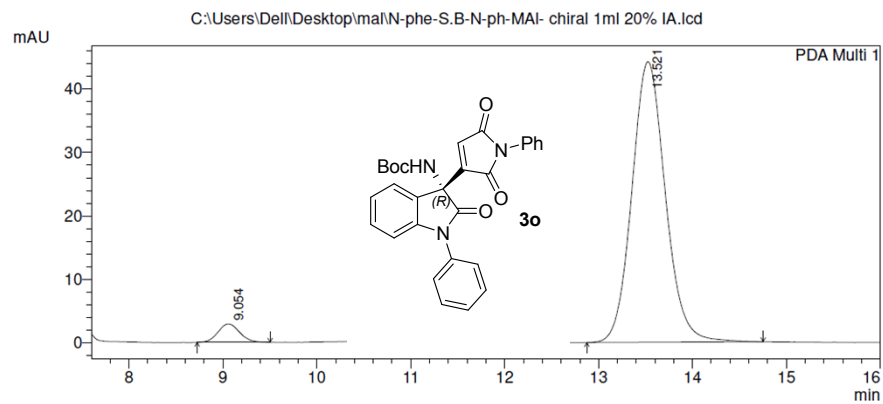

1 PDA Multi 1/254nm 4nm

PeakTable

PDA Ch1 254nm 4nm

| Peak# | Ret. Time | Area    | Height | Area %  | Height % |
|-------|-----------|---------|--------|---------|----------|
| 1     | 9.054     | 46470   | 2902   | 4.074   | 6.164    |
| 2     | 13.521    | 1094144 | 44171  | 95.926  | 93.836   |
| Total |           | 1140614 | 47072  | 100.000 | 100.000  |

==== Shimadzu LCsolution Analysis Report ====

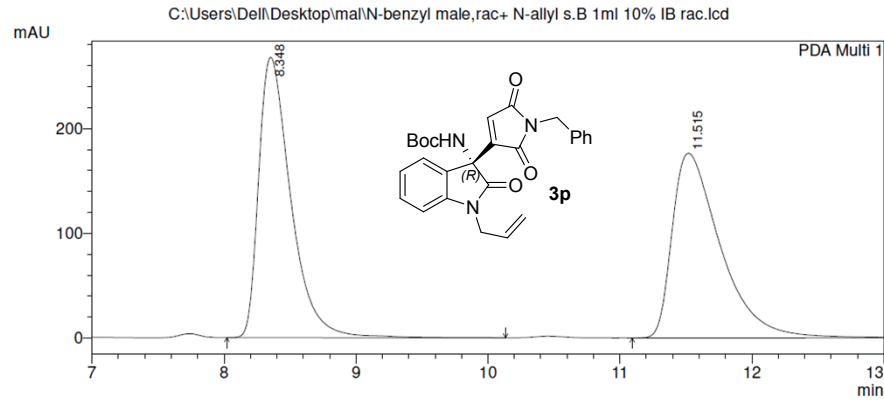

1 PDA Multi 1/254nm 4nm

PeakTable

PDA Ch1 254nm 4nm

| Peak# | Ret. Time | Area    | Height | Area %  | Height % |
|-------|-----------|---------|--------|---------|----------|
| 1     | 8.348     | 4537584 | 267866 | 50.234  | 60.303   |
| 2     | 11.515    | 4495288 | 176337 | 49.766  | 39.697   |
| Total |           | 9032871 | 444203 | 100.000 | 100.000  |

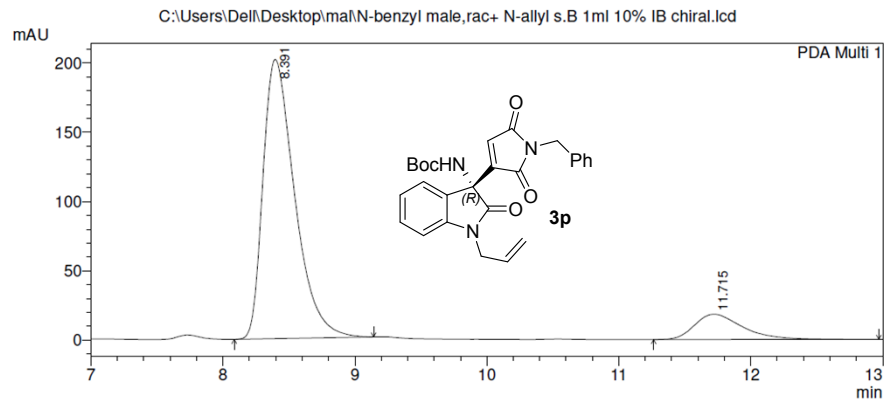

1 PDA Multi 1/254nm 4nm

PeakTable

PDA Ch1 254nm 4nm

| Peak# | Ret. Time | Area    | Height | Area %  | Height % |
|-------|-----------|---------|--------|---------|----------|
| 1     | 8.391     | 3363172 | 201755 | 87.863  | 91.705   |
| 2     | 11.715    | 464558  | 18248  | 12.137  | 8.295    |
| Total |           | 3827730 | 220003 | 100.000 | 100.000  |

==== Shimadzu LCsolution Analysis Report ====

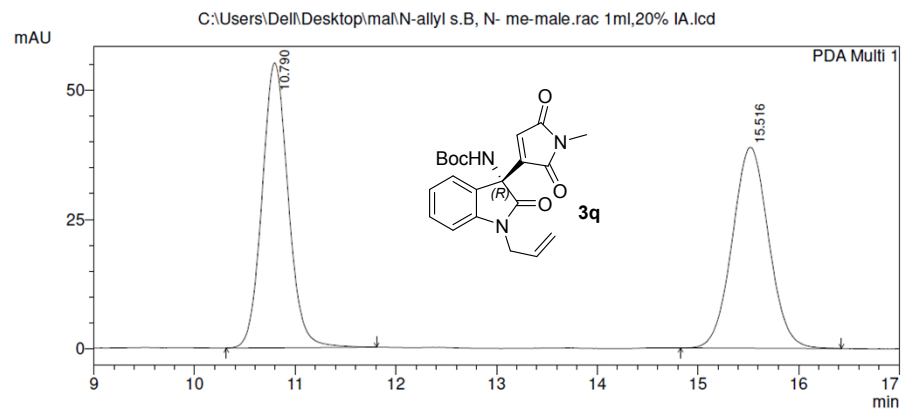

1 PDA Multi 1/254nm 4nm

PeakTable

PDA Ch1 254nm 4nm

| Peak# | Ret. Time | Area    | Height | Area %  | Height % |
|-------|-----------|---------|--------|---------|----------|
| 1     | 10.790    | 995221  | 55152  | 50.480  | 58.654   |
| 2     | 15.516    | 976281  | 38877  | 49.520  | 41.346   |
| Total |           | 1971502 | 94029  | 100.000 | 100.000  |

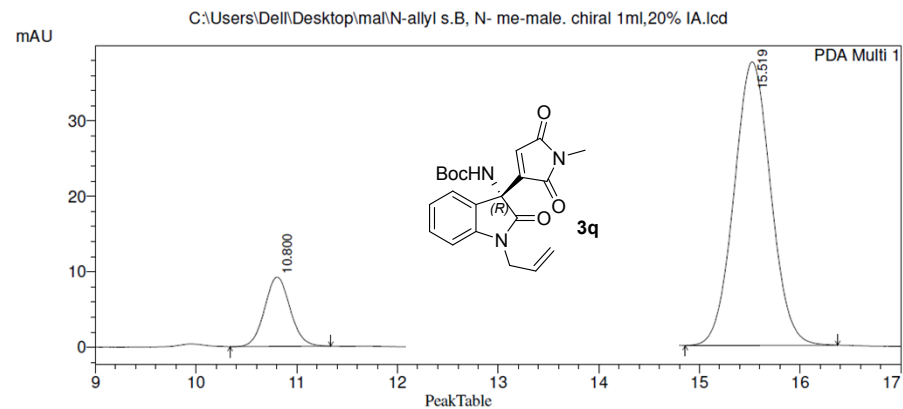

PDA Ch1 254nm 4nm

| Peak# | Ret. Time | Area    | Height | Area %  | Height % |
|-------|-----------|---------|--------|---------|----------|
| 1     | 10.800    | 161967  | 9172   | 14.523  | 19.629   |
| 2     | 15.519    | 953292  | 37555  | 85.477  | 80.371   |
| Total |           | 1115259 | 46726  | 100.000 | 100.000  |

==== Shimadzu LCsolution Analysis Report ====

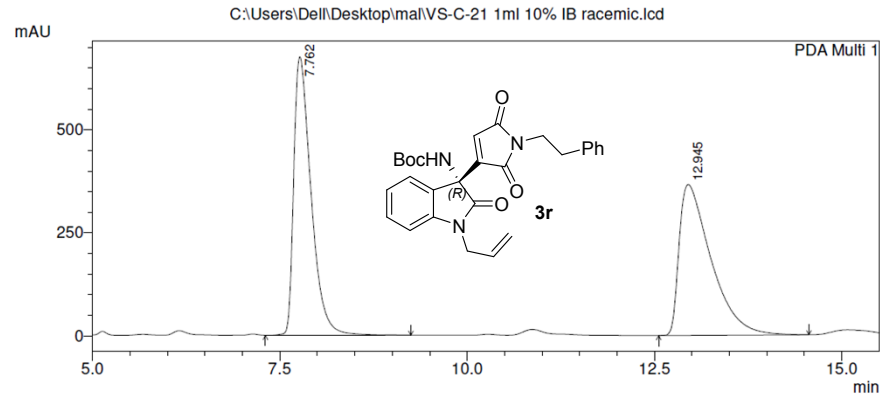

1 PDA Multi 1/254nm 4nm

PeakTable

PDA Ch1 254nm 4nm

| Peak# | Ret. Time | Area     | Height  | Area %  | Height % |
|-------|-----------|----------|---------|---------|----------|
| 1     | 7.762     | 10870438 | 676311  | 50.015  | 64.858   |
| 2     | 12.945    | 10863758 | 366451  | 49.985  | 35.142   |
| Total |           | 21734196 | 1042762 | 100.000 | 100.000  |

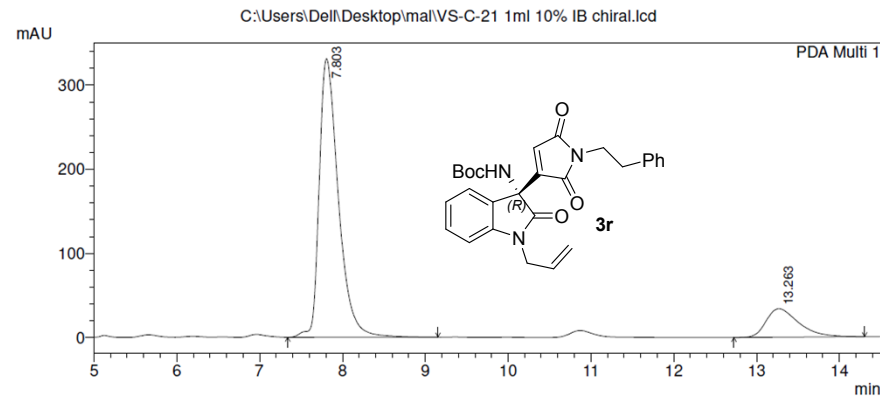

1 PDA Multi 1/254nm 4nm

PeakTable

PDA Ch1 254nm 4nm

| Peak# | Ret. Time | Area    | Height | Area %  | Height % |
|-------|-----------|---------|--------|---------|----------|
| 1     | 7.803     | 5318838 | 331027 | 85.222  | 90.749   |
| 2     | 13.263    | 922312  | 33744  | 14.778  | 9.251    |
| Total |           | 6241151 | 364771 | 100.000 | 100.000  |

==== Shimadzu LCsolution Analysis Report ====

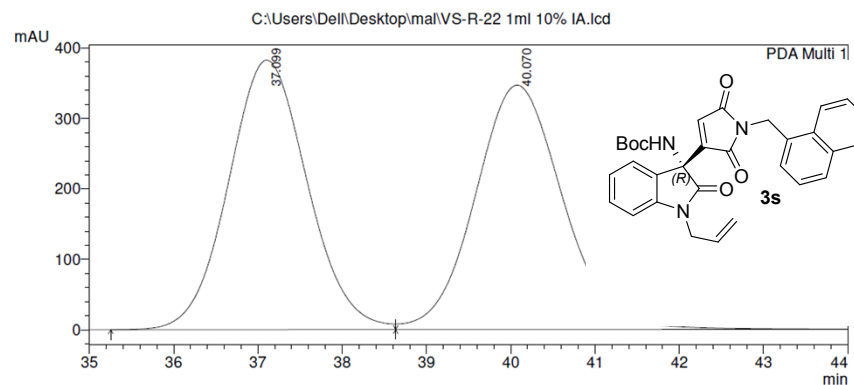

1 PDA Multi 1/218nm 4nm

PeakTable

PDA Ch1 218nm 4nm

| Peak# | Ret. Time | Area     | Height | Area %  | Height % |
|-------|-----------|----------|--------|---------|----------|
| 1     | 37.099    | 24931766 | 382694 | 49.677  | 52.446   |
| 2     | 40.070    | 25256093 | 347004 | 50.323  | 47.554   |
| Total |           | 50187859 | 729698 | 100.000 | 100.000  |

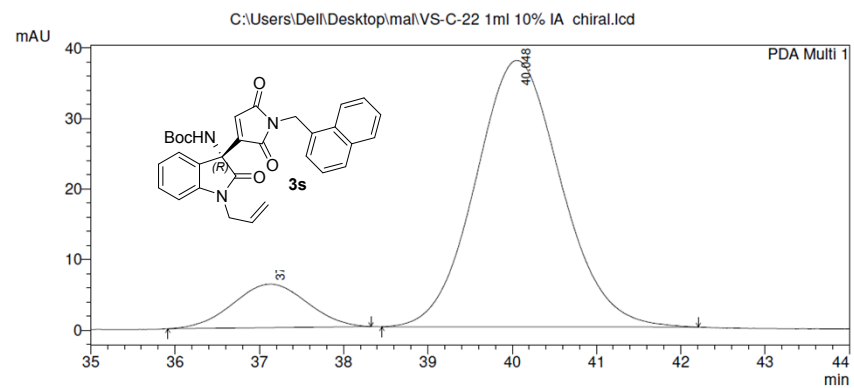

1 PDA Multi 1/254nm 4nm

PeakTable

PDA Ch1 254nm 4nm

| Peak# | Ret. Time | Area    | Height | Area %  | Height % |
|-------|-----------|---------|--------|---------|----------|
| 1     | 37.134    | 377598  | 6187   | 12.381  | 14.068   |
| 2     | 40.048    | 2672312 | 37789  | 87.619  | 85.932   |
| Total |           | 3049910 | 43976  | 100.000 | 100.000  |

May12-2014  
VS-MAL  
1H-1D

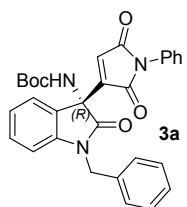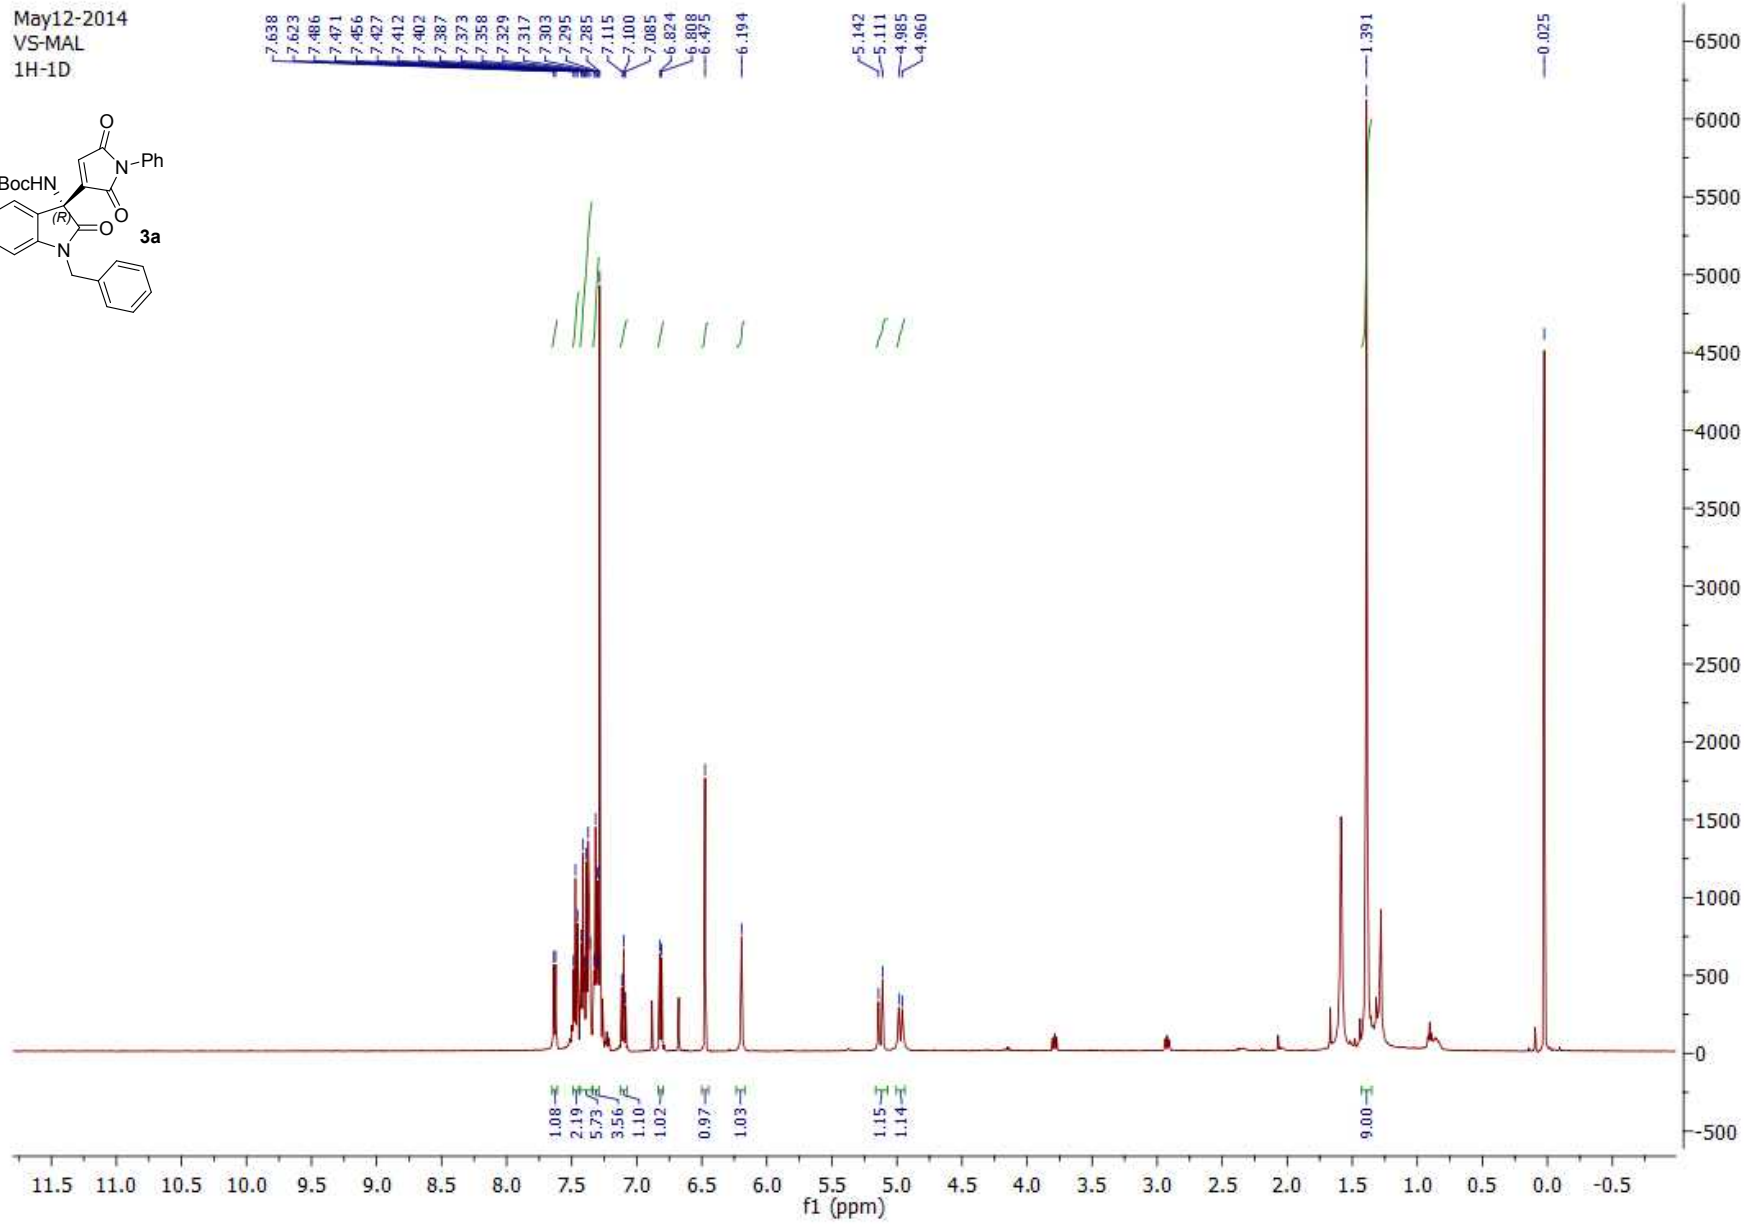



May12-2014  
VS-MAL  
13C-1D

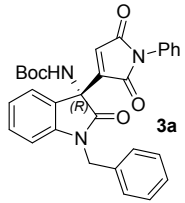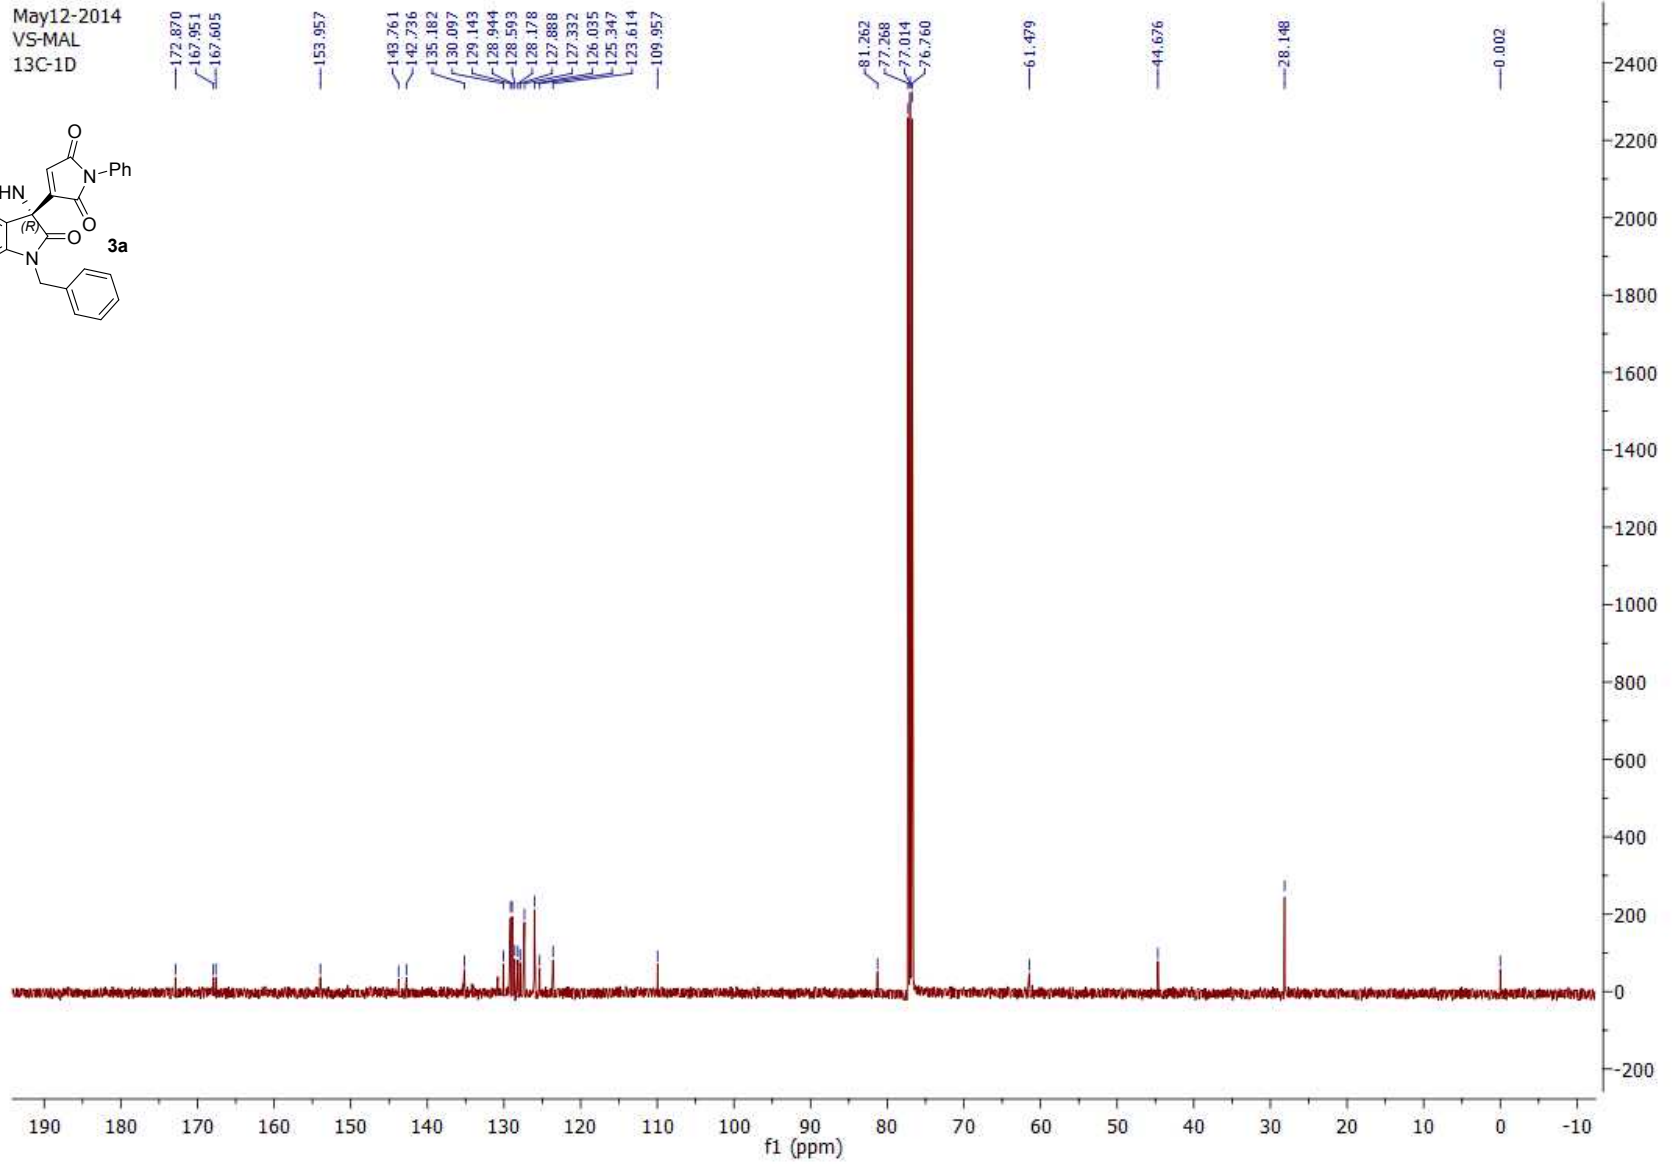

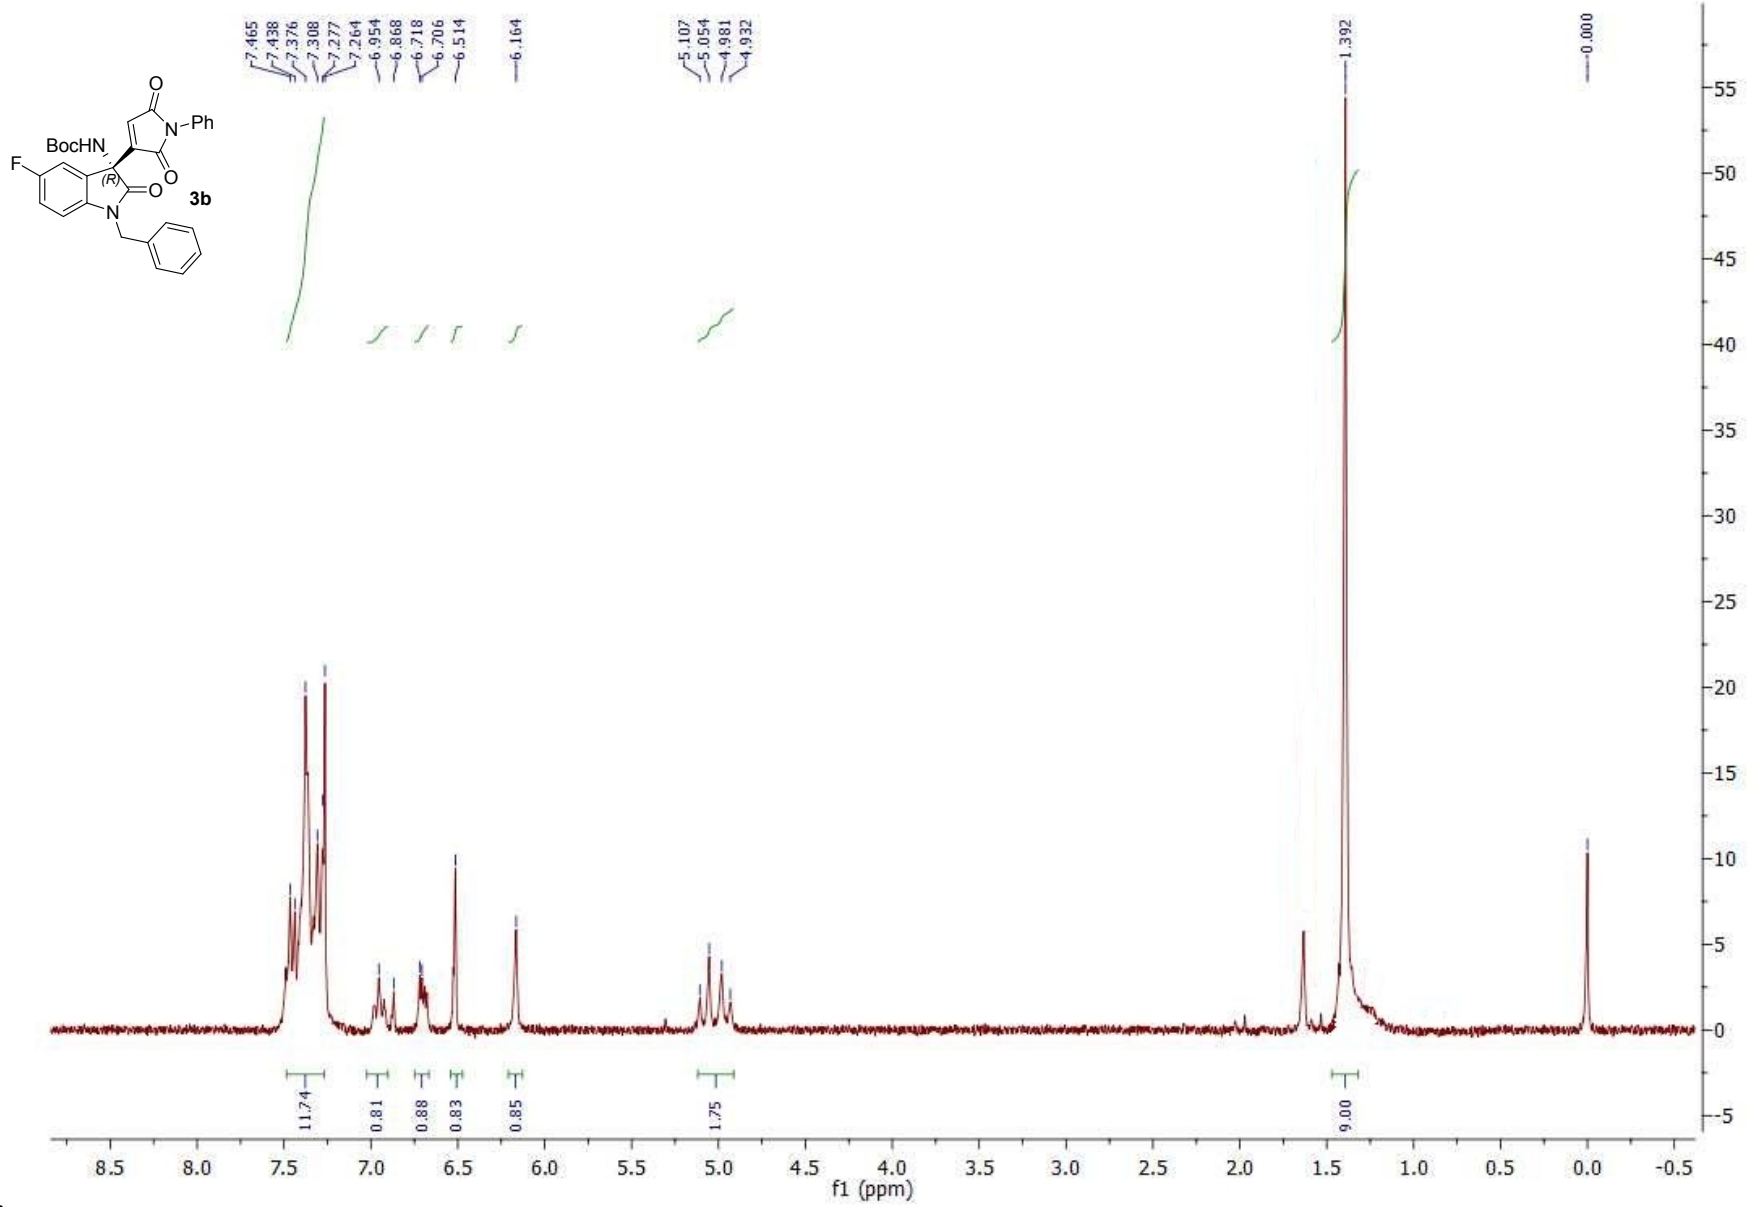

Apr09-2014  
VS-C-13

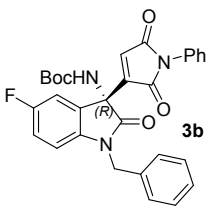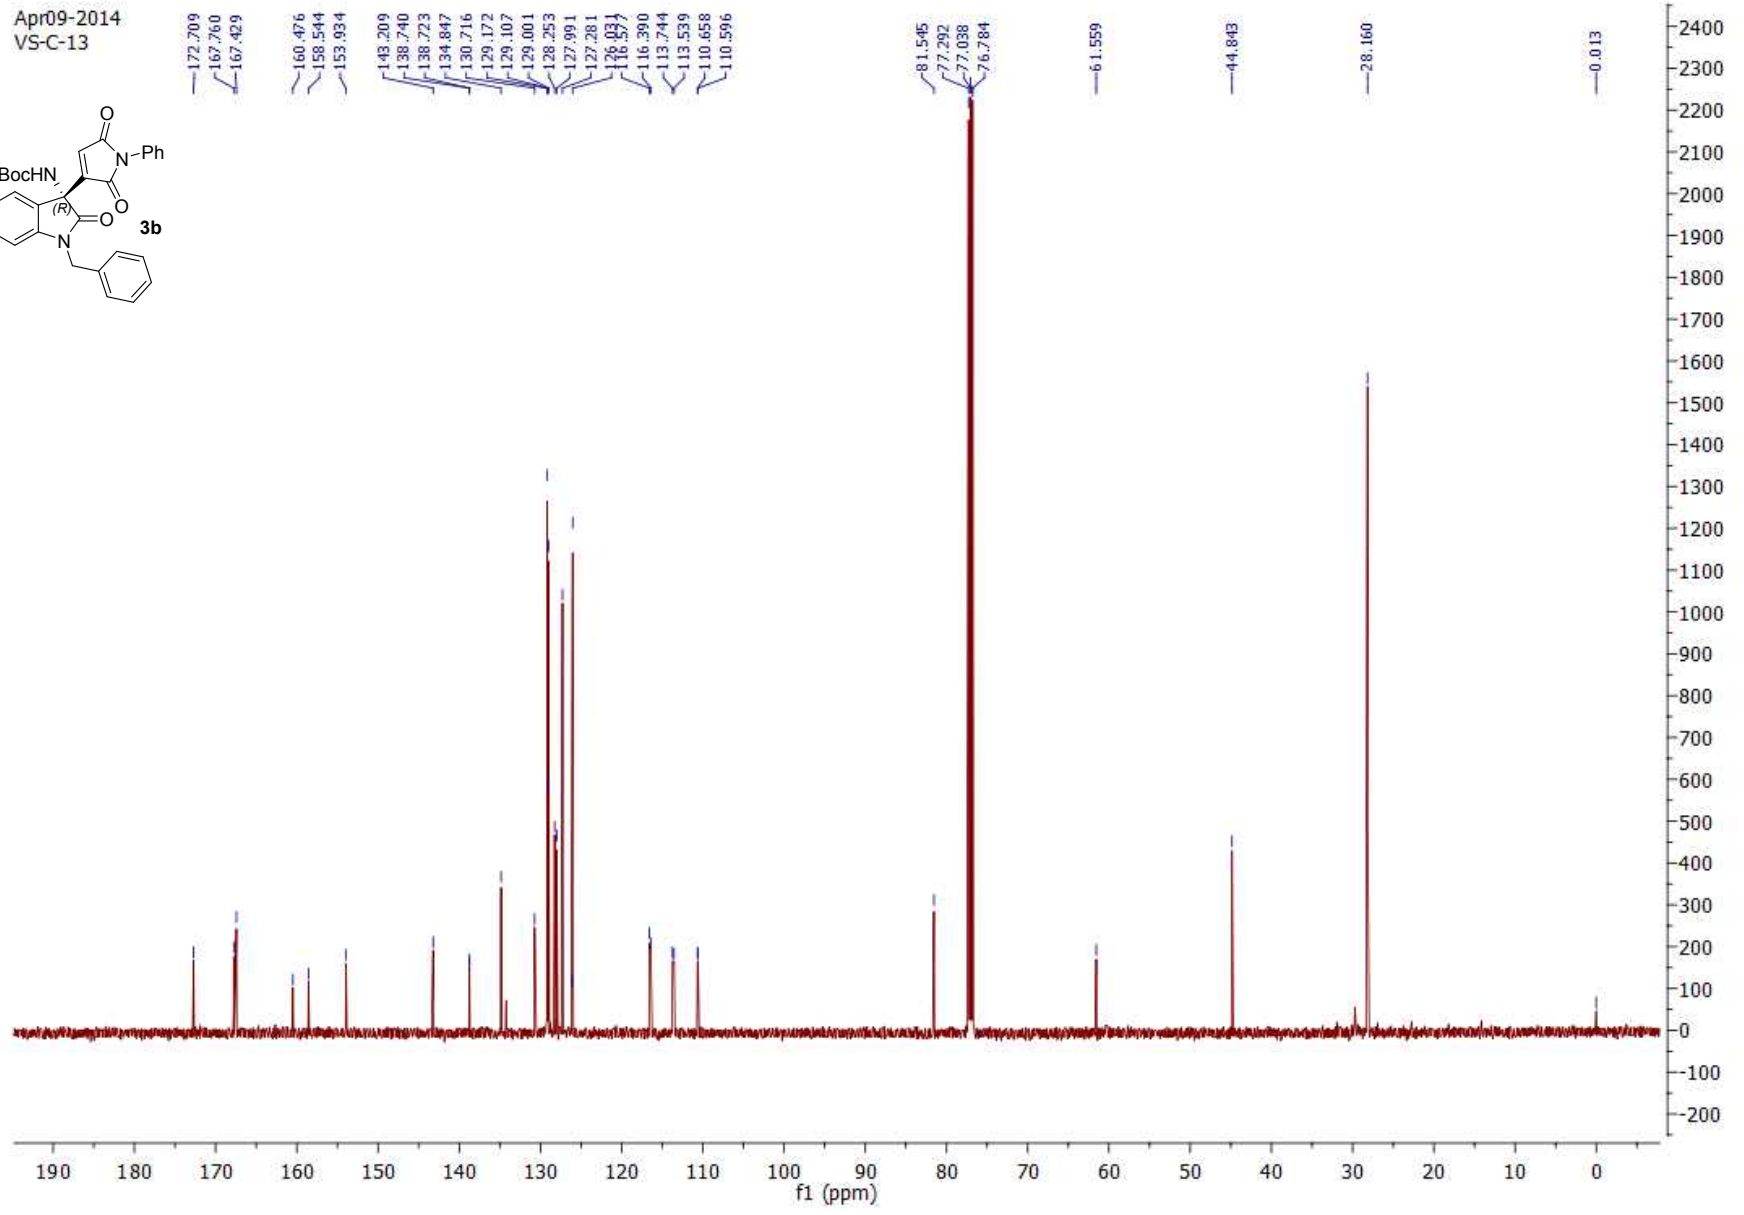

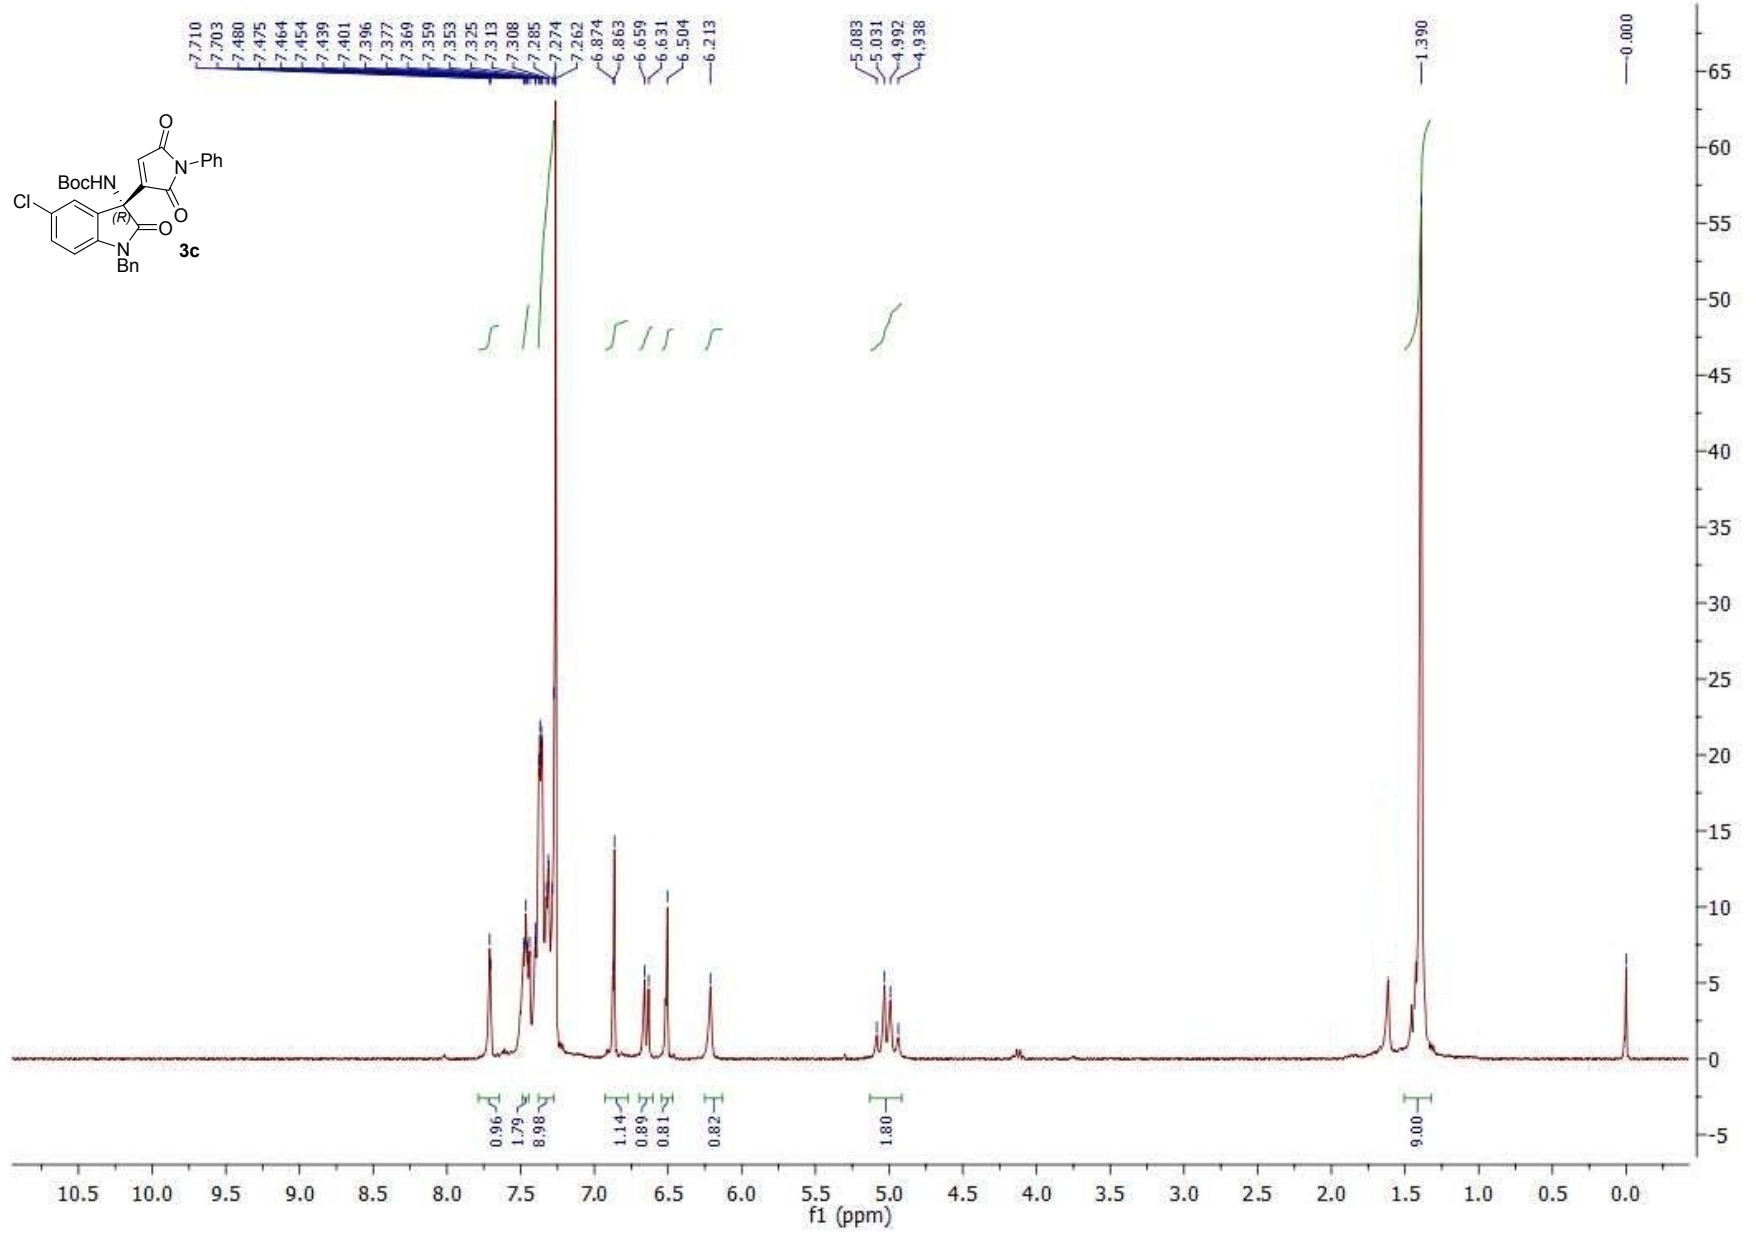

VS-A-10

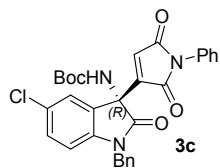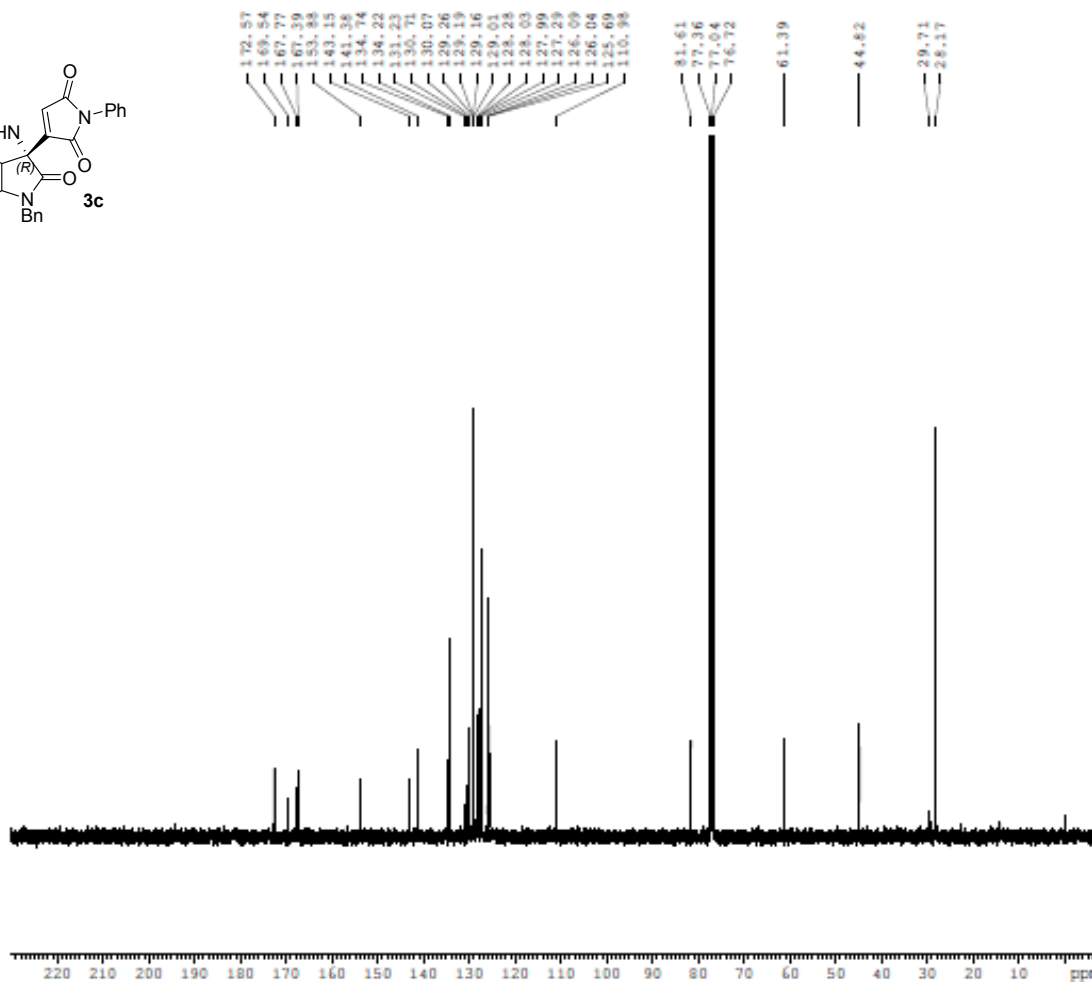

BRUKER  
 AVANCE II 400 NMR  
 Spectrometer  
 SAIF  
 Panjab University  
 Chandigarh

Current Data Parameters  
 NAME Mar25-2014  
 EXPNO 370  
 PROCNO 1

F2 - Acquisition Parameters  
 Date\_ 20140326  
 Time 6.29  
 INSTRUM spect  
 PROBHD 5 mm PABBO BB-  
 PULPROG zgpg30  
 ID 65536  
 SOLVENT CDC13  
 NS 512  
 DS 4  
 SWH 29761.904 Hz  
 FIDRES 0.454131 Hz  
 AQ 1.1010548 sec  
 RG 724  
 LW 16.800 usec  
 DE 6.00 usec  
 TE 298.5 K  
 D1 2.00000000 sec  
 d11 0.03000000 sec  
 DELTA 1.89999998 sec  
 TDO 1

----- CHANNEL f1 -----  
 NUC1 13C  
 P1 9.60 usec  
 PL1 -2.00 dB  
 SFO1 100.6228298 MHz

----- CHANNEL f2 -----  
 CPDPRG2 waltz16  
 NUC2 1H  
 PCPD2 80.00 usec  
 PL2 -3.00 dB  
 PL12 14.31 dB  
 PL13 18.00 dB  
 SFO2 400.1316005 MHz

F2 - Processing parameters  
 SI 32768  
 SF 100.6127690 MHz  
 WDW EM  
 SSB 0  
 LB 1.00 Hz  
 GB 0  
 PC 1.40

avtar\_saiipu@yahoo.co.in

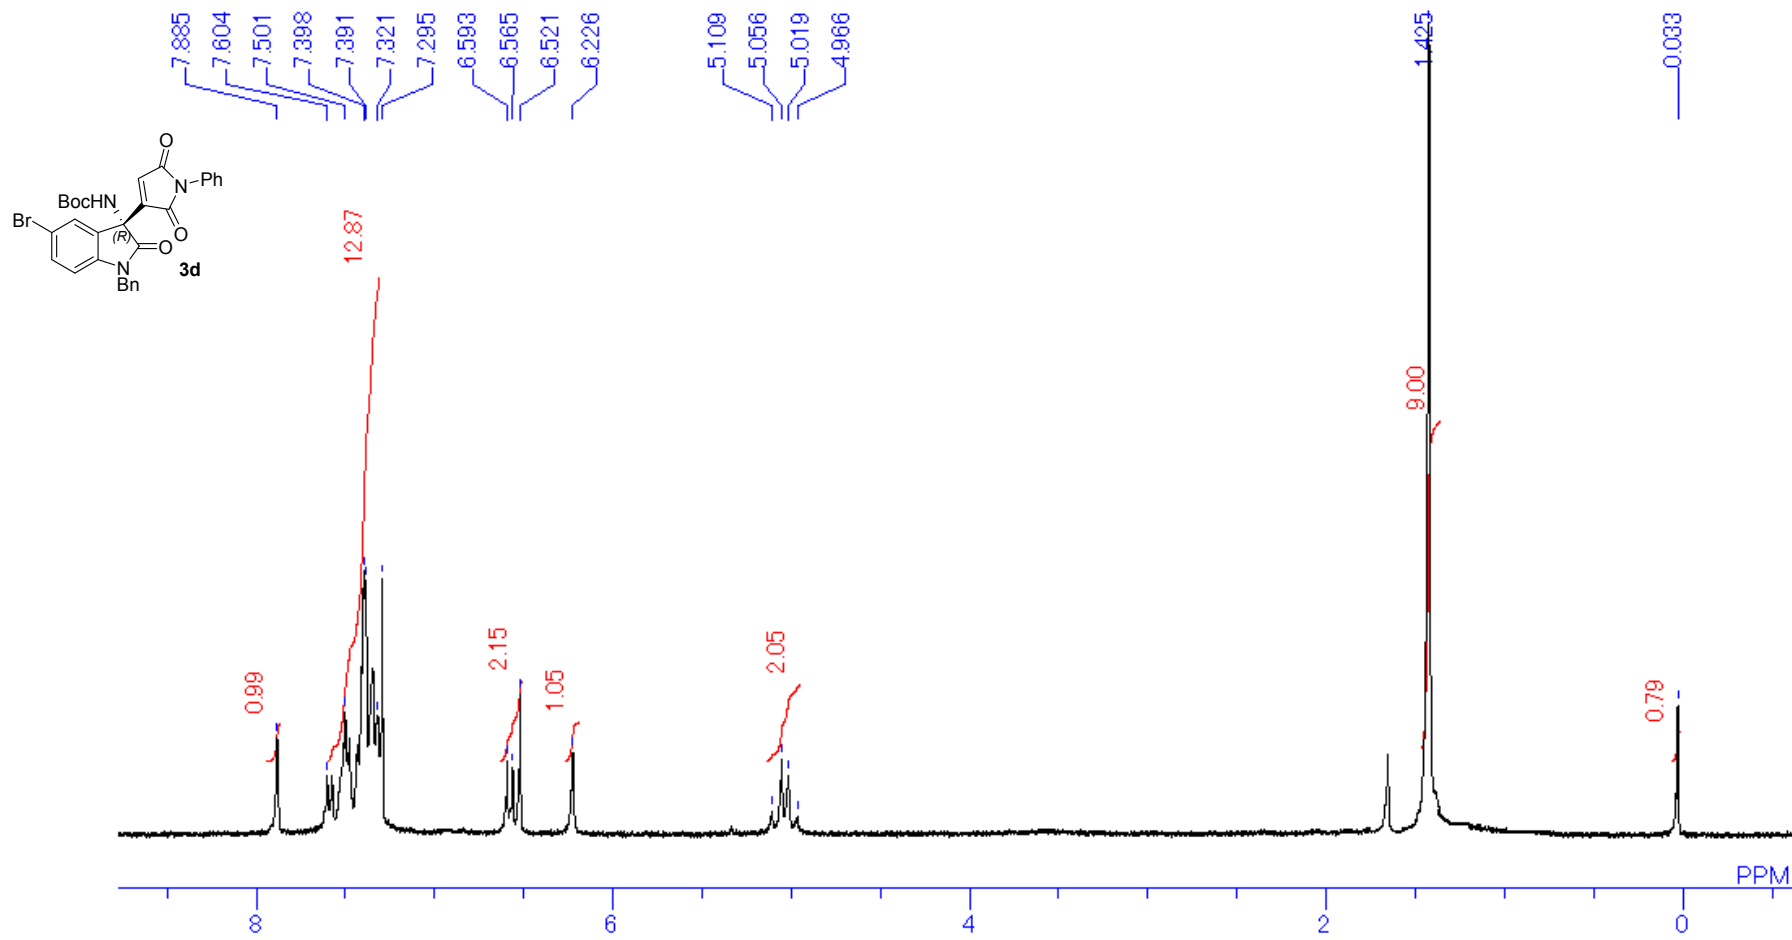

VS-A-4

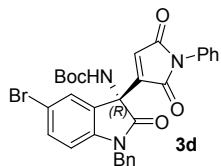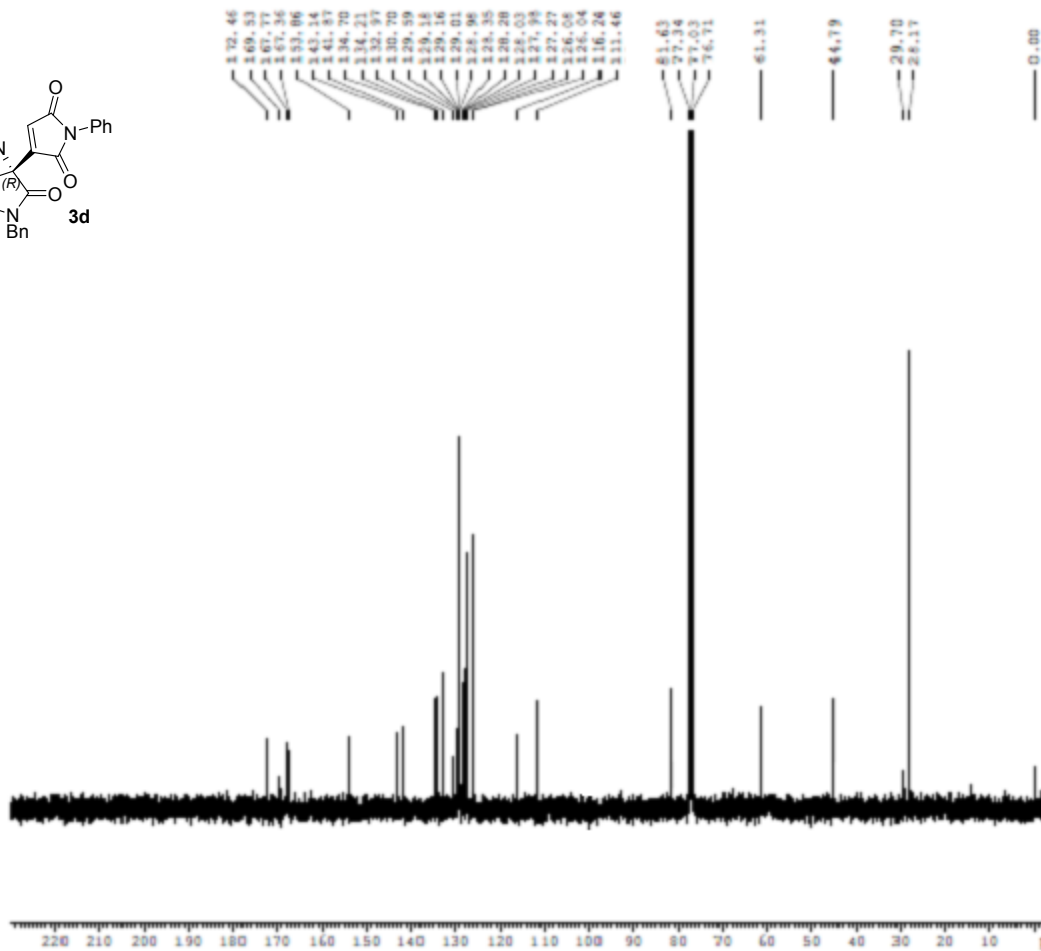

BRUKER  
 AVANCE II 400 NMR  
 Spectrometer  
 SAIF  
 Panjab University  
 Chandigarh

Current Data Parameters  
 NAME Mar25-2014  
 EXPNO 400  
 PROCNO 1

F2 - Acquisition Parameters  
 Date\_ 20140326  
 Time 8.08  
 INSTRUM spect  
 PROBHD 5 mm WBBO BB-  
 PULPROG zgpg30  
 TD 65536  
 SOLVENT CDCl3  
 NS 512  
 DS 4  
 SWH 29761.904 Hz  
 FIDRES 0.454131 Hz  
 AQ 1.1010548 sec  
 RG 36  
 DM 16.800 usec  
 DE 6.00 usec  
 TE 298.5 K  
 D1 2.00000000 sec  
 d11 0.03000000 sec  
 DELTA 1.89999998 sec  
 TDO 1

----- CHANNEL f1 -----  
 NUC1 13C  
 P1 9.60 usec  
 PL1 -2.00 dB  
 SFO1 100.6228298 MHz

----- CHANNEL f2 -----  
 CPDPRG2 waltz16  
 NUC2 1H  
 PCPD2 80.00 usec  
 PL2 -3.00 dB  
 PL12 14.31 dB  
 PL13 18.00 dB  
 SFO2 400.1316005 MHz

F2 - Processing parameters  
 SI 32768  
 SF 100.6127697 MHz  
 WDW EM  
 SSB 0  
 LB 1.00 Hz  
 GB 0  
 PC 1.40

avtar\_saifpu@yahoo.co.in

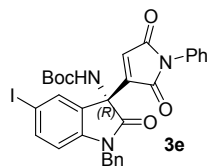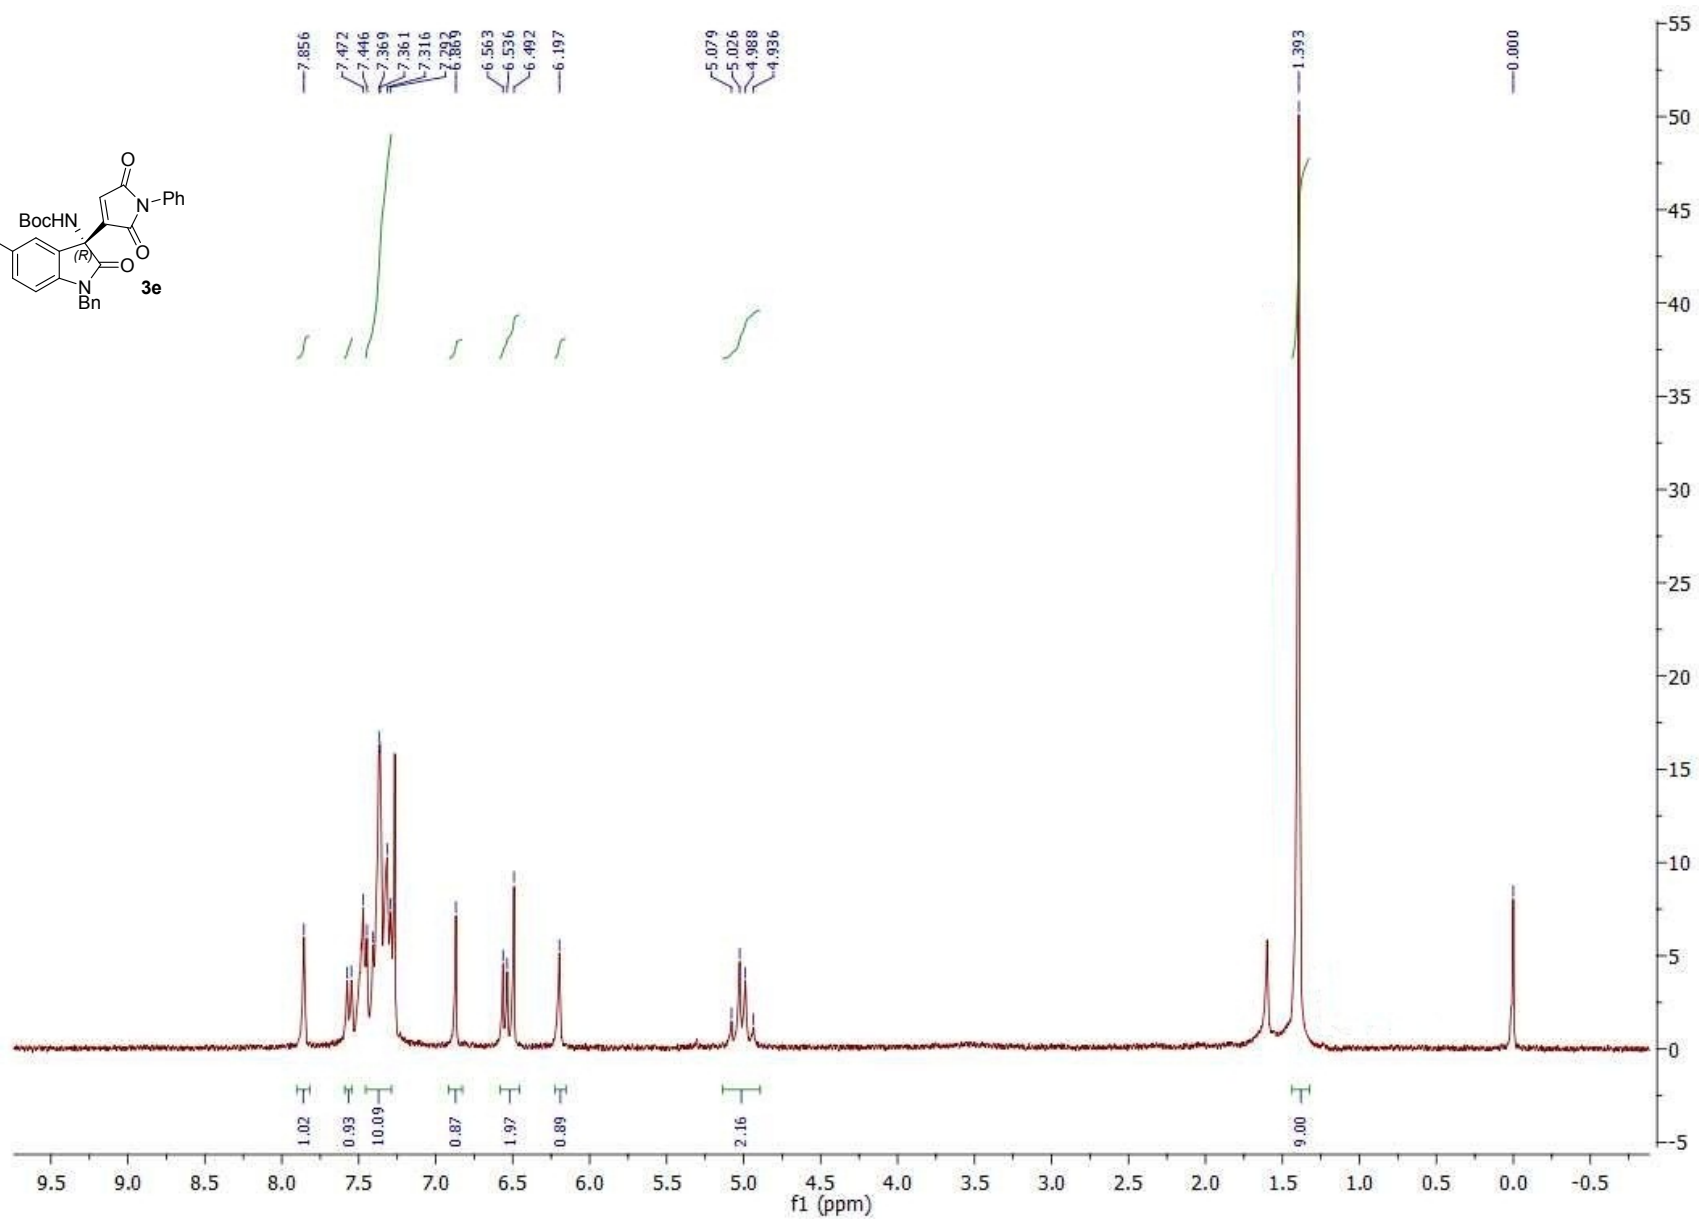



VS-A-12

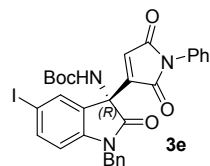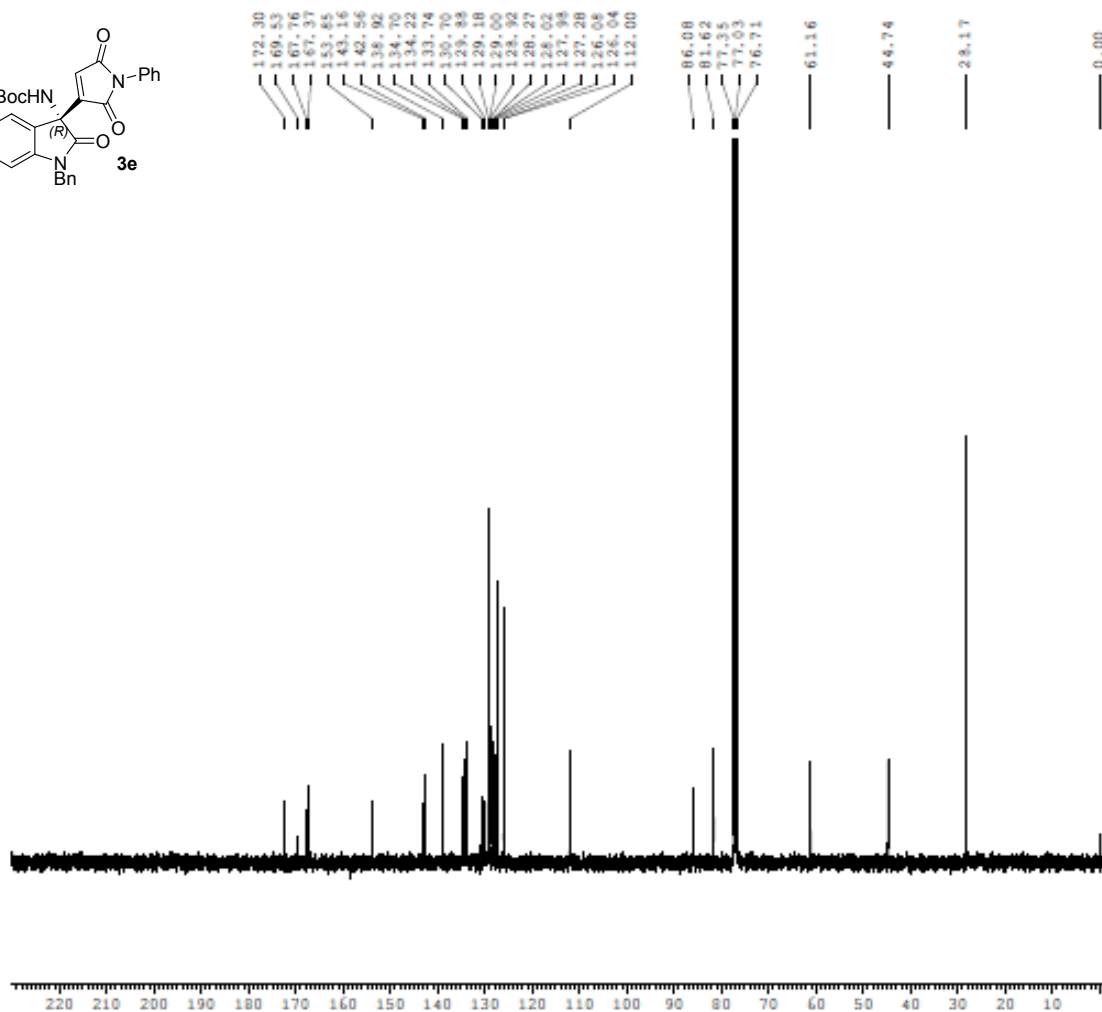

BRUKER  
AVANCE II 400 NMR  
Spectrometer  
SAIF  
Panjab University  
Chandigarh

Current Data Parameters  
NAME Mar25-2014  
EXPNO 420  
PROCNO 1

F2 - Acquisition Parameters  
Date\_ 20140326  
Time 9.06  
INSTRUM spect  
PROBHD 5 mm PABBO BB-  
PULPROG zgpg30  
ID 65536  
SOLVENT CDCl3  
NS 512  
DS 4  
SWH 29761.904 Hz  
FIDRES 0.454131 Hz  
AQ 1.1010548 sec  
RG 724  
DW 16.800 usec  
DE 6.00 usec  
TE 298.7 K  
D1 2.00000000 sec  
d11 0.03000000 sec  
DELTA 1.89999998 sec  
ID0 1

----- CHANNEL f1 -----  
NUC1 13C  
P1 9.60 usec  
PL1 -2.00 dB  
SFO1 100.6228298 MHz

----- CHANNEL f2 -----  
CPDPRG2 waltz16  
NUC2 1H  
PCPD2 80.00 usec  
PL2 -3.00 dB  
PL12 14.31 dB  
PL13 18.00 dB  
SFO2 400.1316005 MHz

F2 - Processing parameters  
SI 32768  
SF 100.6127699 MHz  
WDW EM  
SSB 0  
LB 1.00 Hz  
GB 0  
PC 1.40

avtar\_saiipu@yahoo.co.in

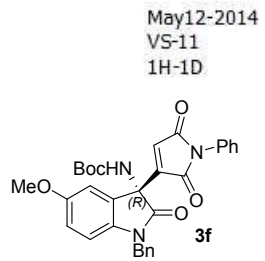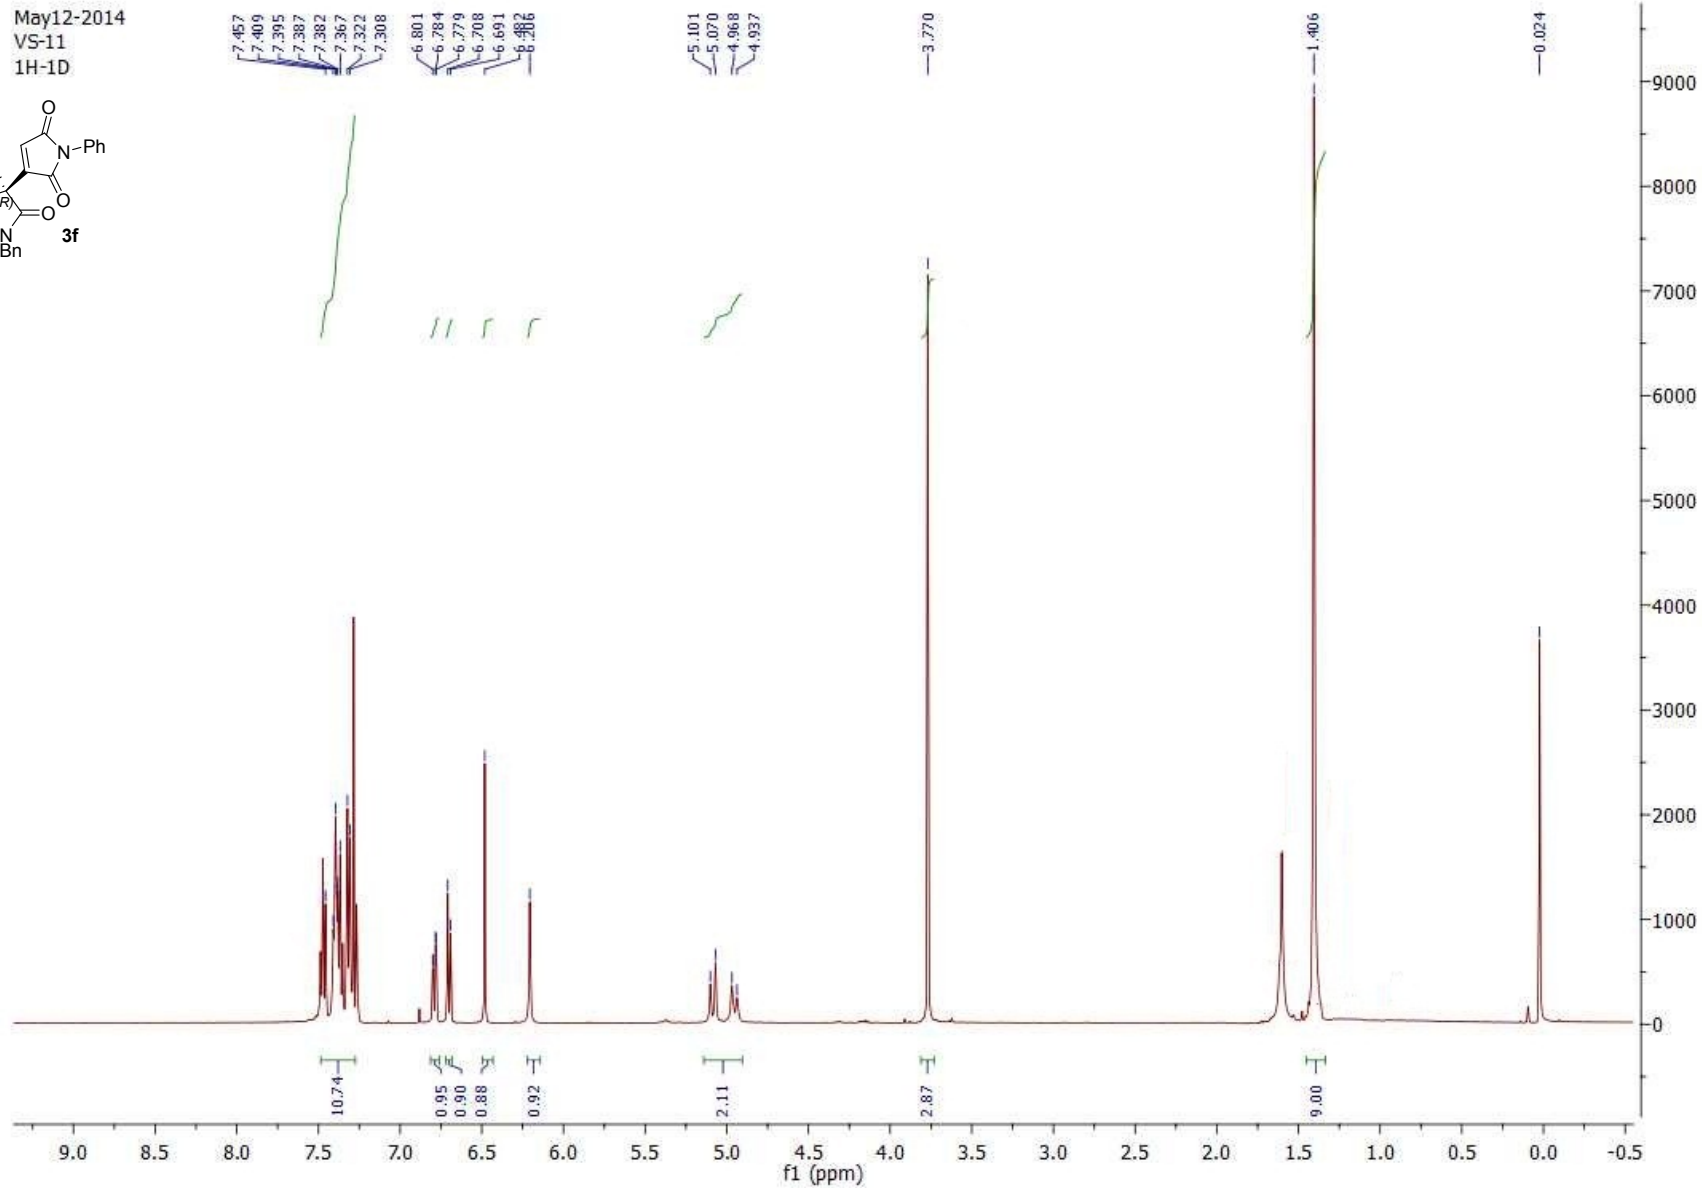

May12-2014  
VS-11  
13C-1D

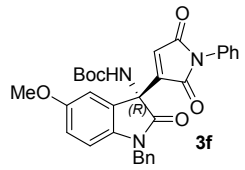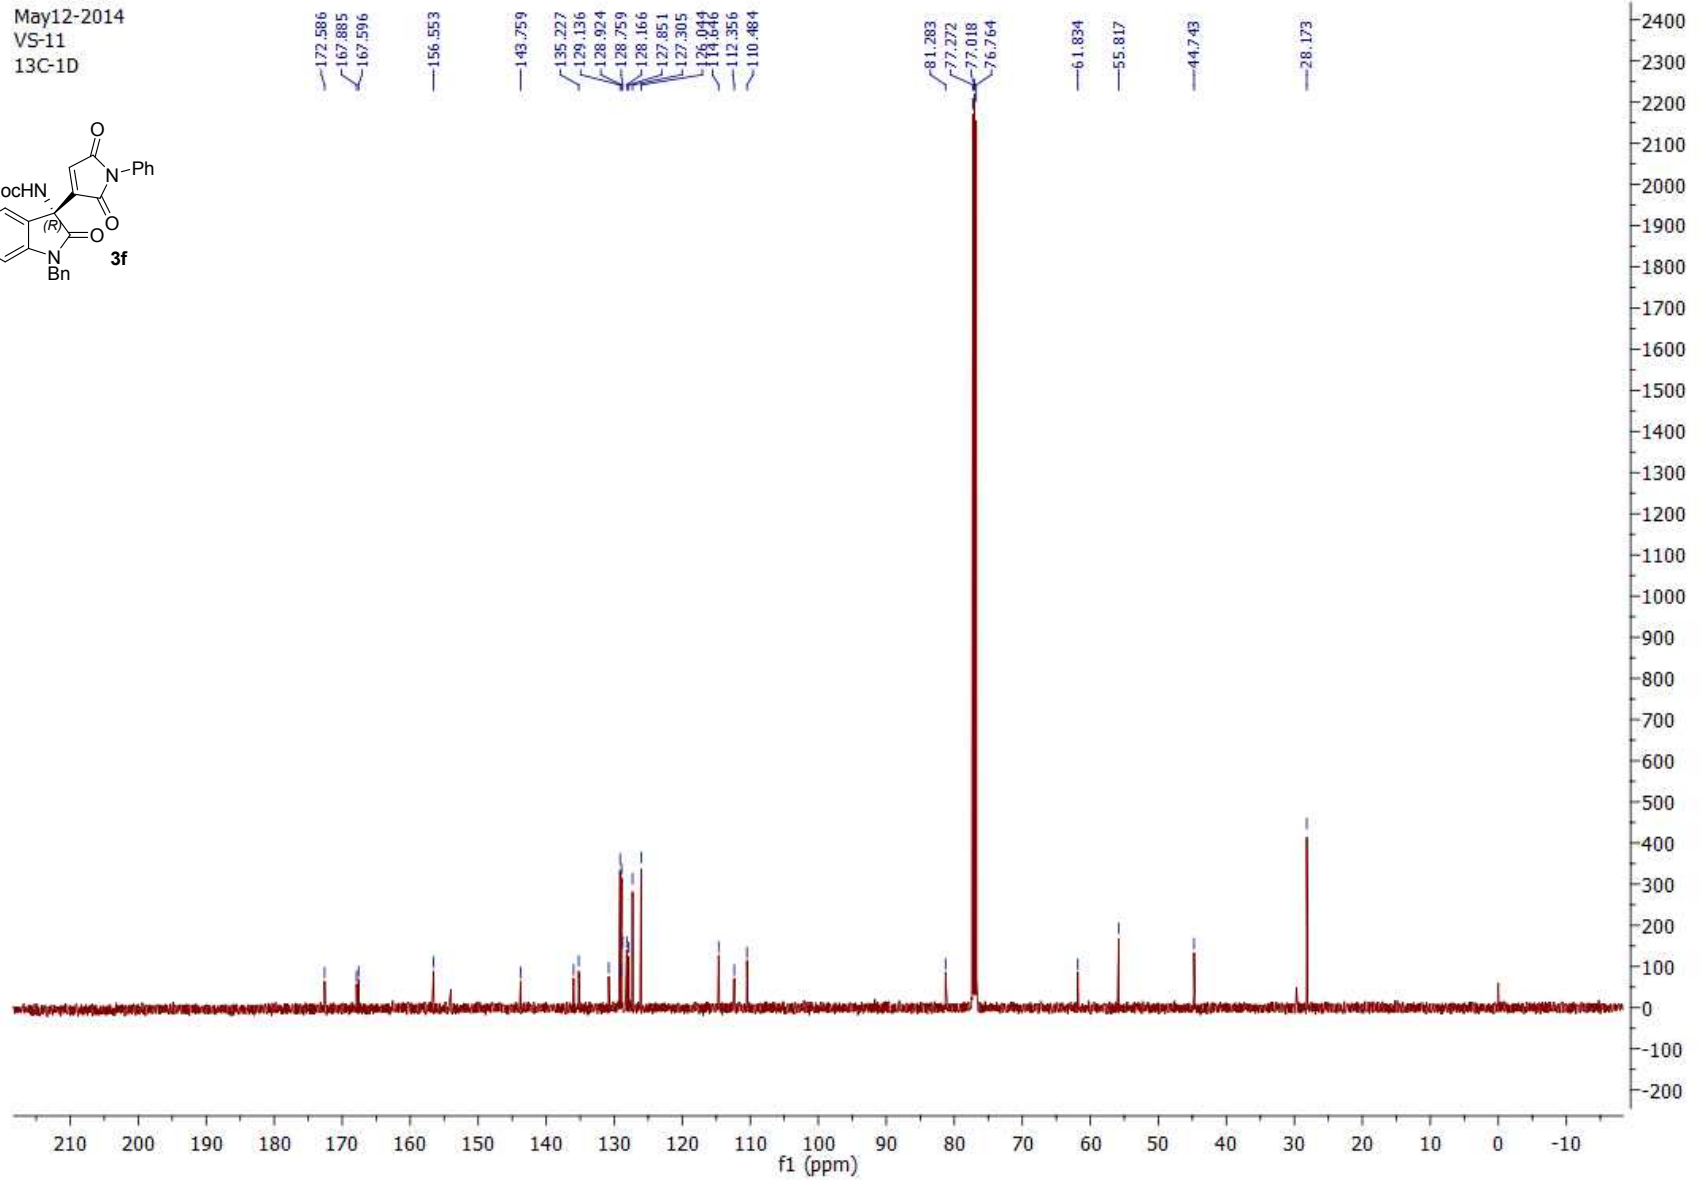

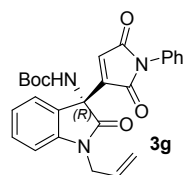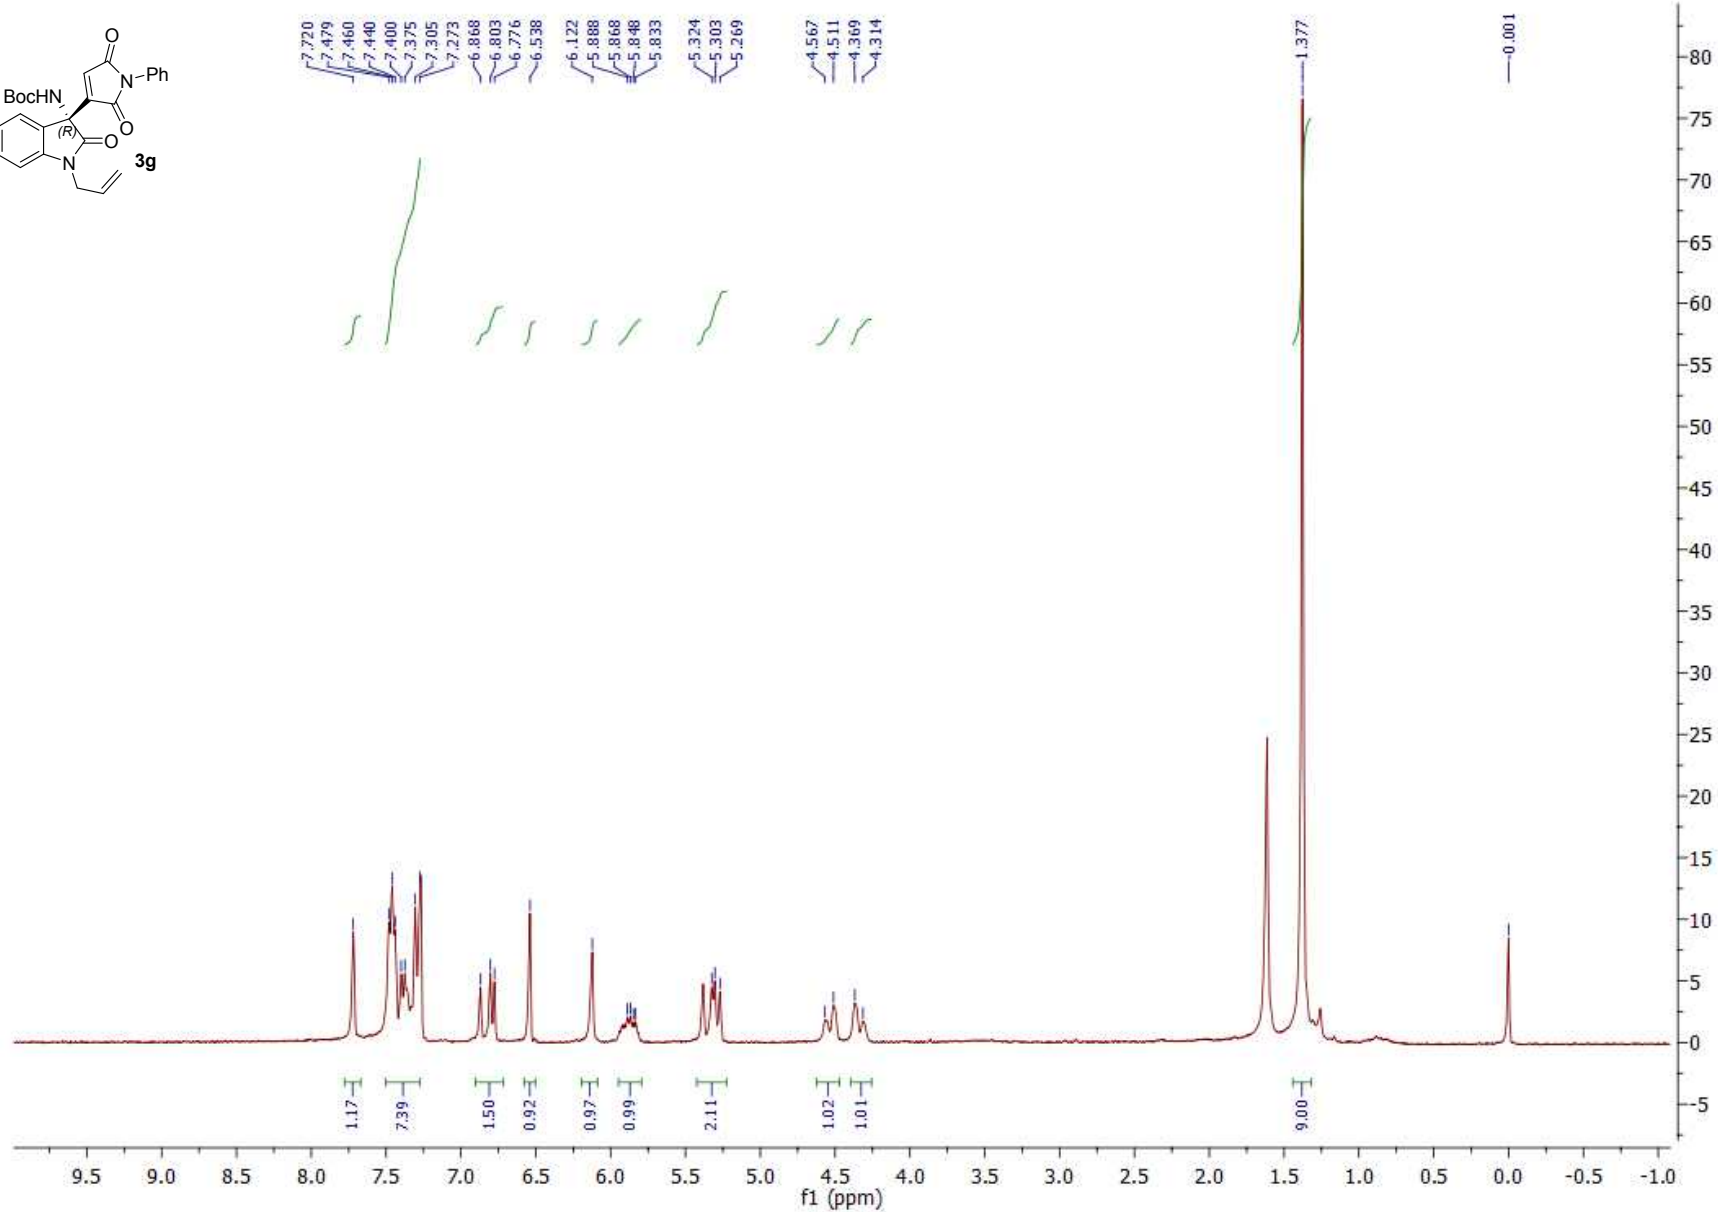

VS-A-7

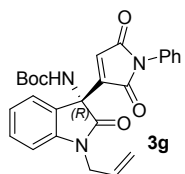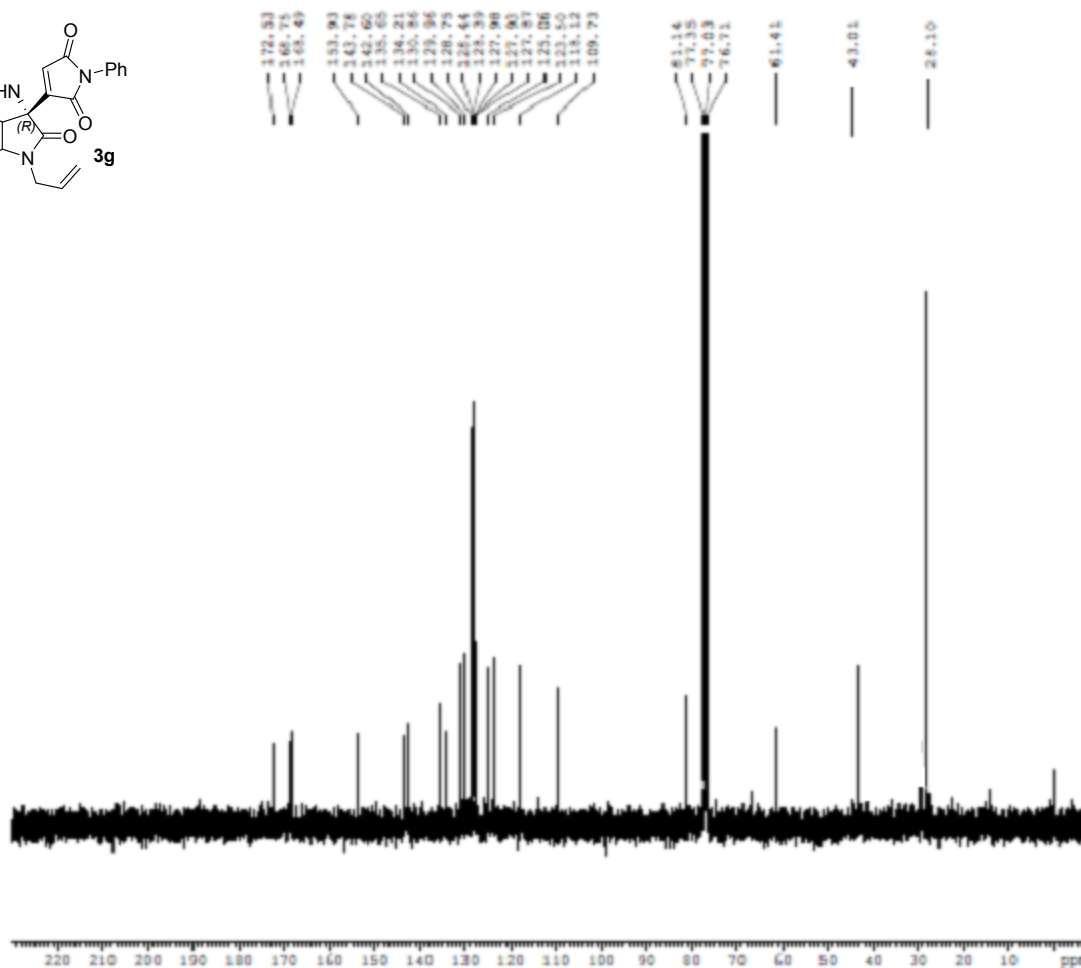

BRUKER  
AVANCE II 400 NMR  
Spectrometer  
SAIF  
Panjab University  
Chandigarh

Current Data Parameters  
NAME Mar25-2014  
EXPNO 410  
PROCNO 1

F2 - Acquisition Parameters  
Date\_ 20140326  
Time 8.41  
INSTRUM spect  
PROBHD 5 mm DABBO BB-  
PULPROG zgpg30  
ID 65534  
SOLVENT CDCl3  
NS 512  
DS 4  
SWH 29761.904 Hz  
FIDRES 0.454131 Hz  
AQ 1.1010548 sec  
RG 912  
DM 16.800 usec  
DE 6.00 usec  
TE 298.6 K  
D1 2.0000000 sec  
d11 0.0300000 sec  
DELTA 1.8999999 sec  
TD0 1

----- CHANNEL f1 -----  
NUC1 13C  
P1 9.60 usec  
PL1 -2.00 dB  
SFO1 100.6228298 MHz

----- CHANNEL f2 -----  
CDDPRG2 waltz16  
NUC2 1H  
PCPD2 80.00 usec  
PL2 -3.00 dB  
PL12 14.31 dB  
PL13 18.00 dB  
SFO2 400.1316005 MHz

F2 - Processing parameters  
SI 32768  
SF 100.6127689 MHz  
WDW EM  
SSB 0  
LB 1.00 Hz  
CB 0  
PC 1.40

avtar\_saifpu@yahoo.co.in

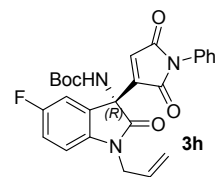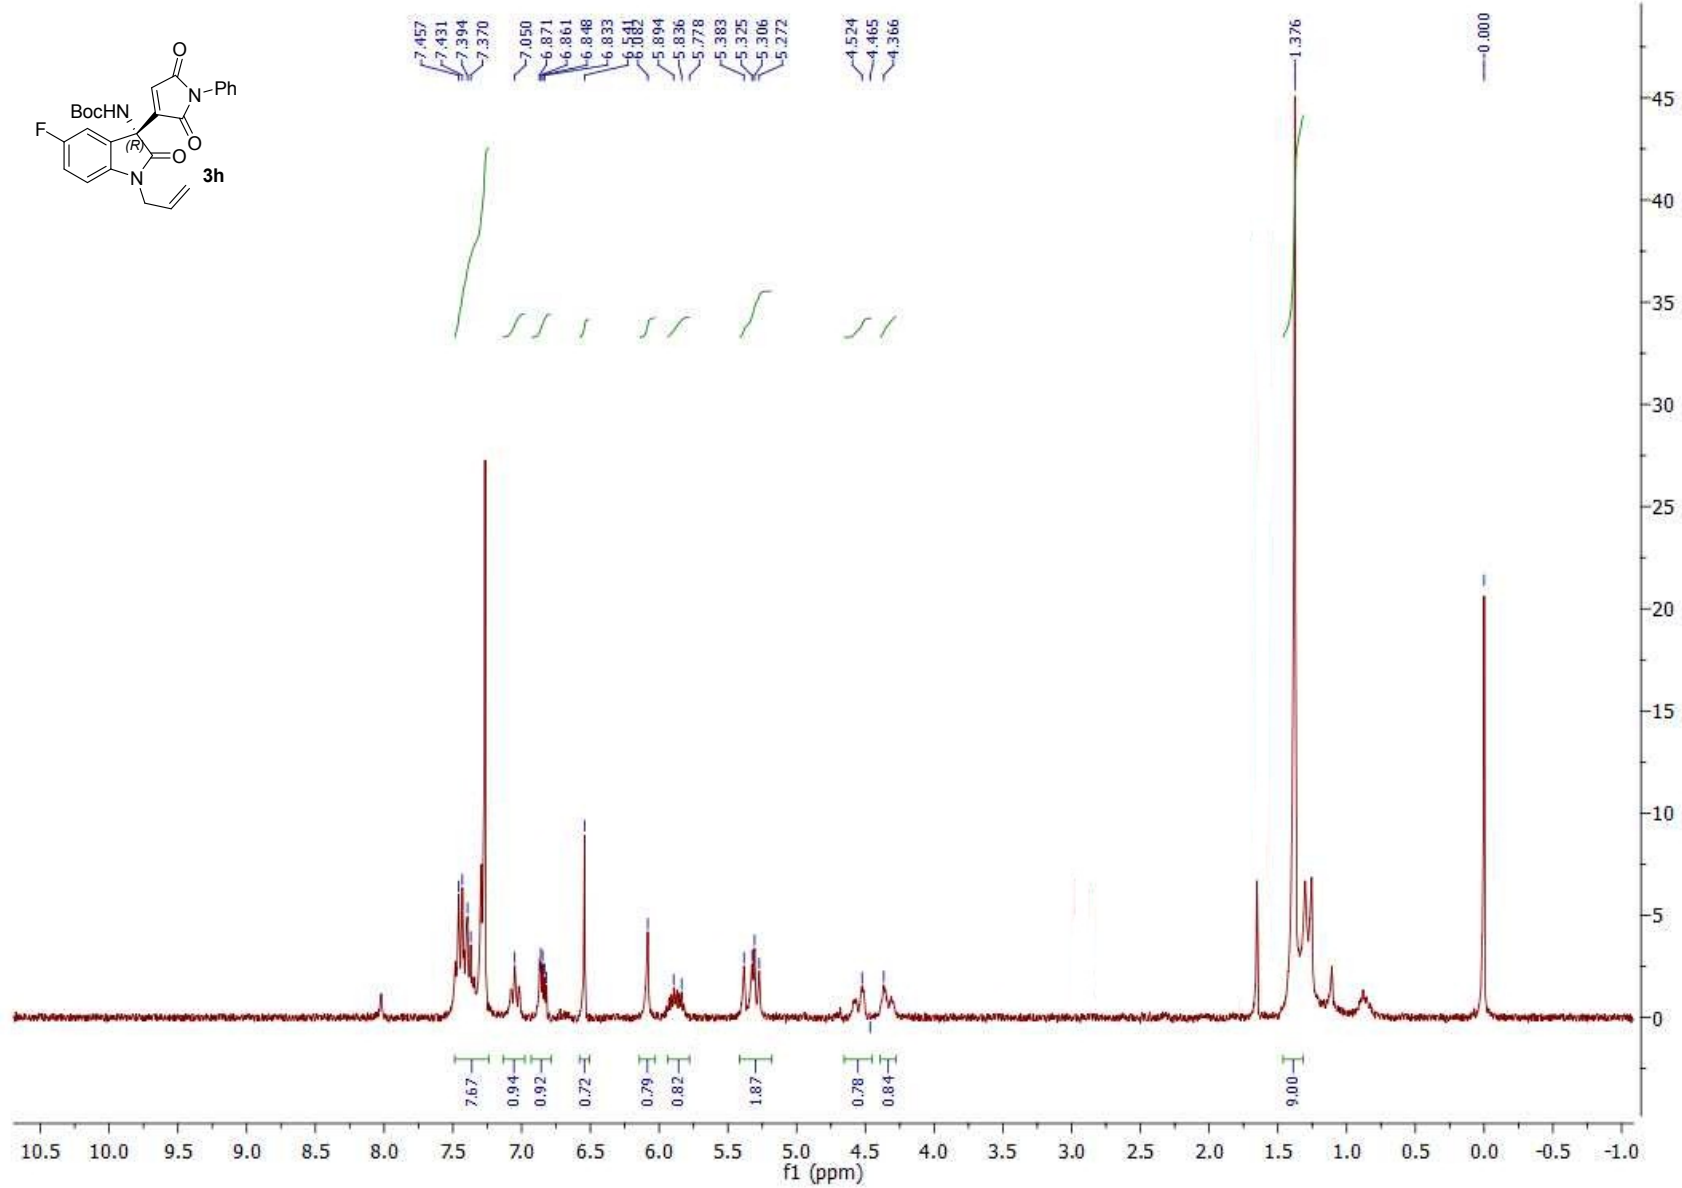

Apr02-2014  
VS-C-9

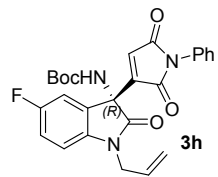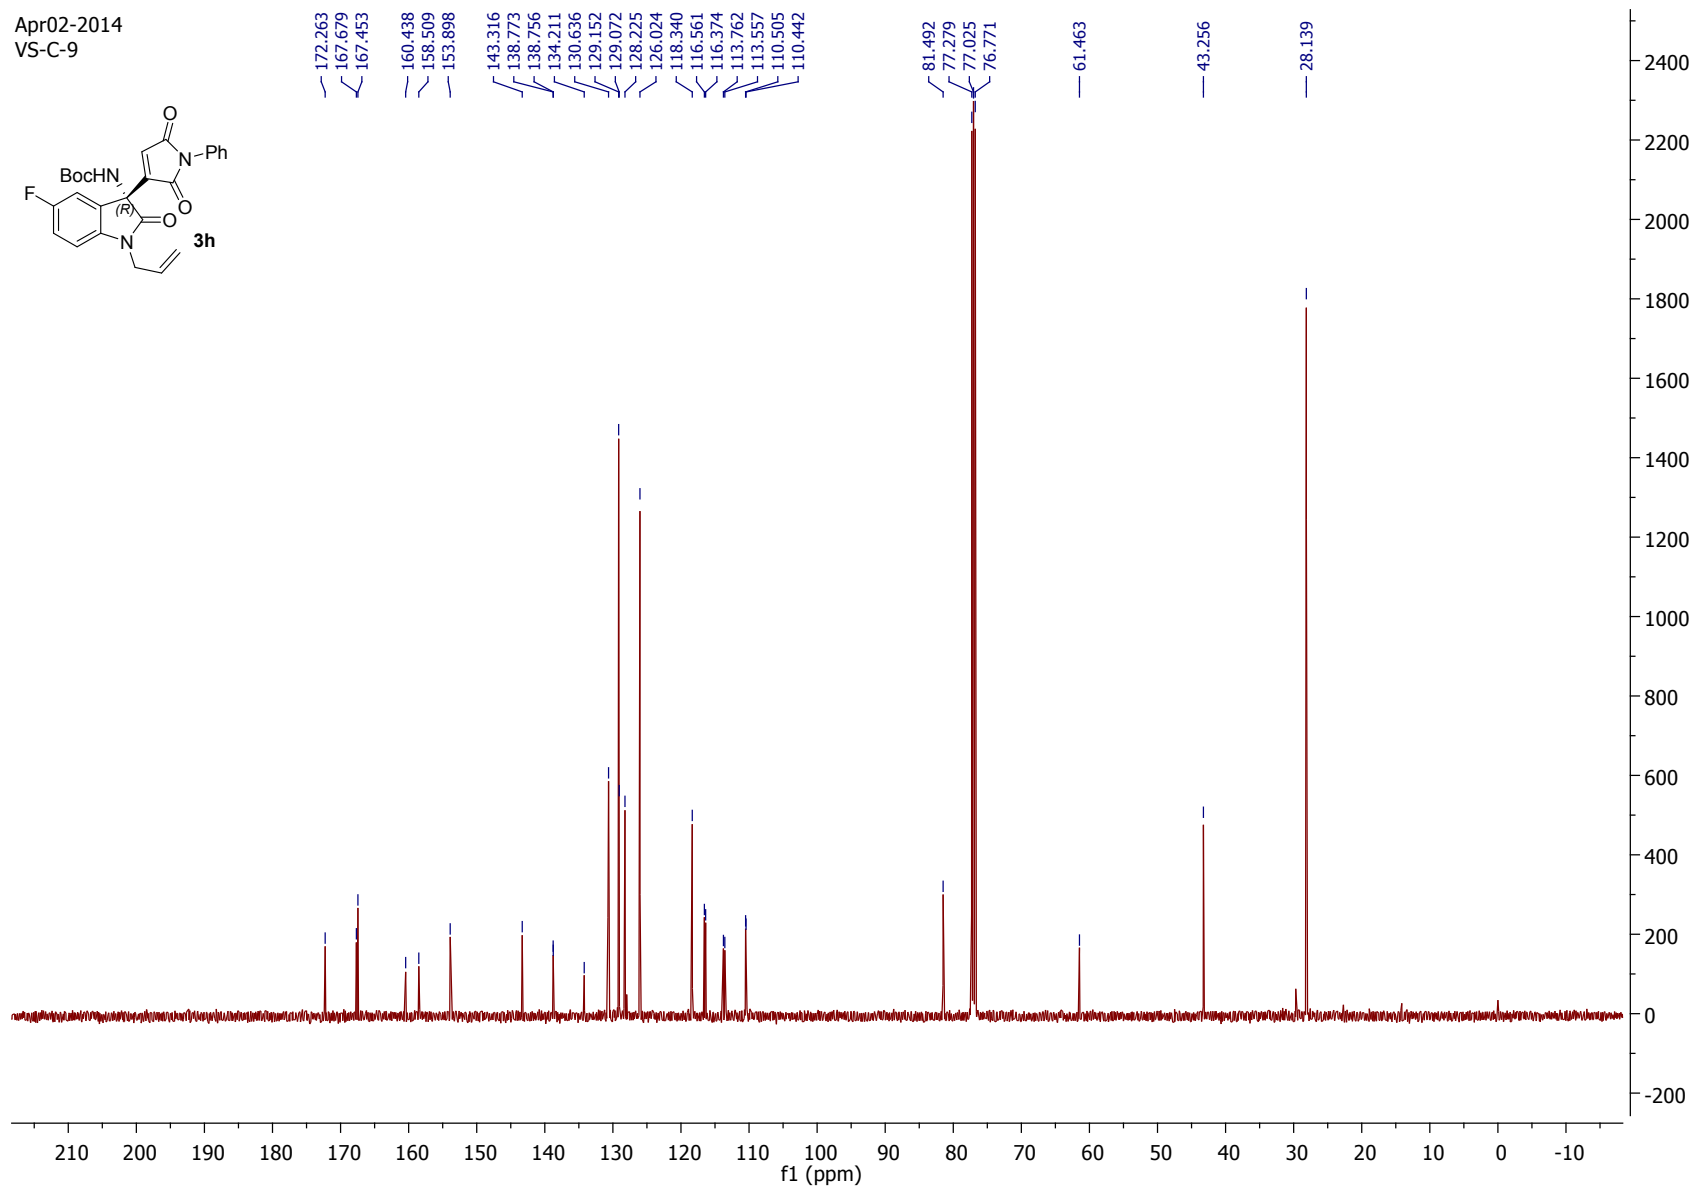

May20-2014  
VS-6

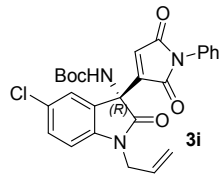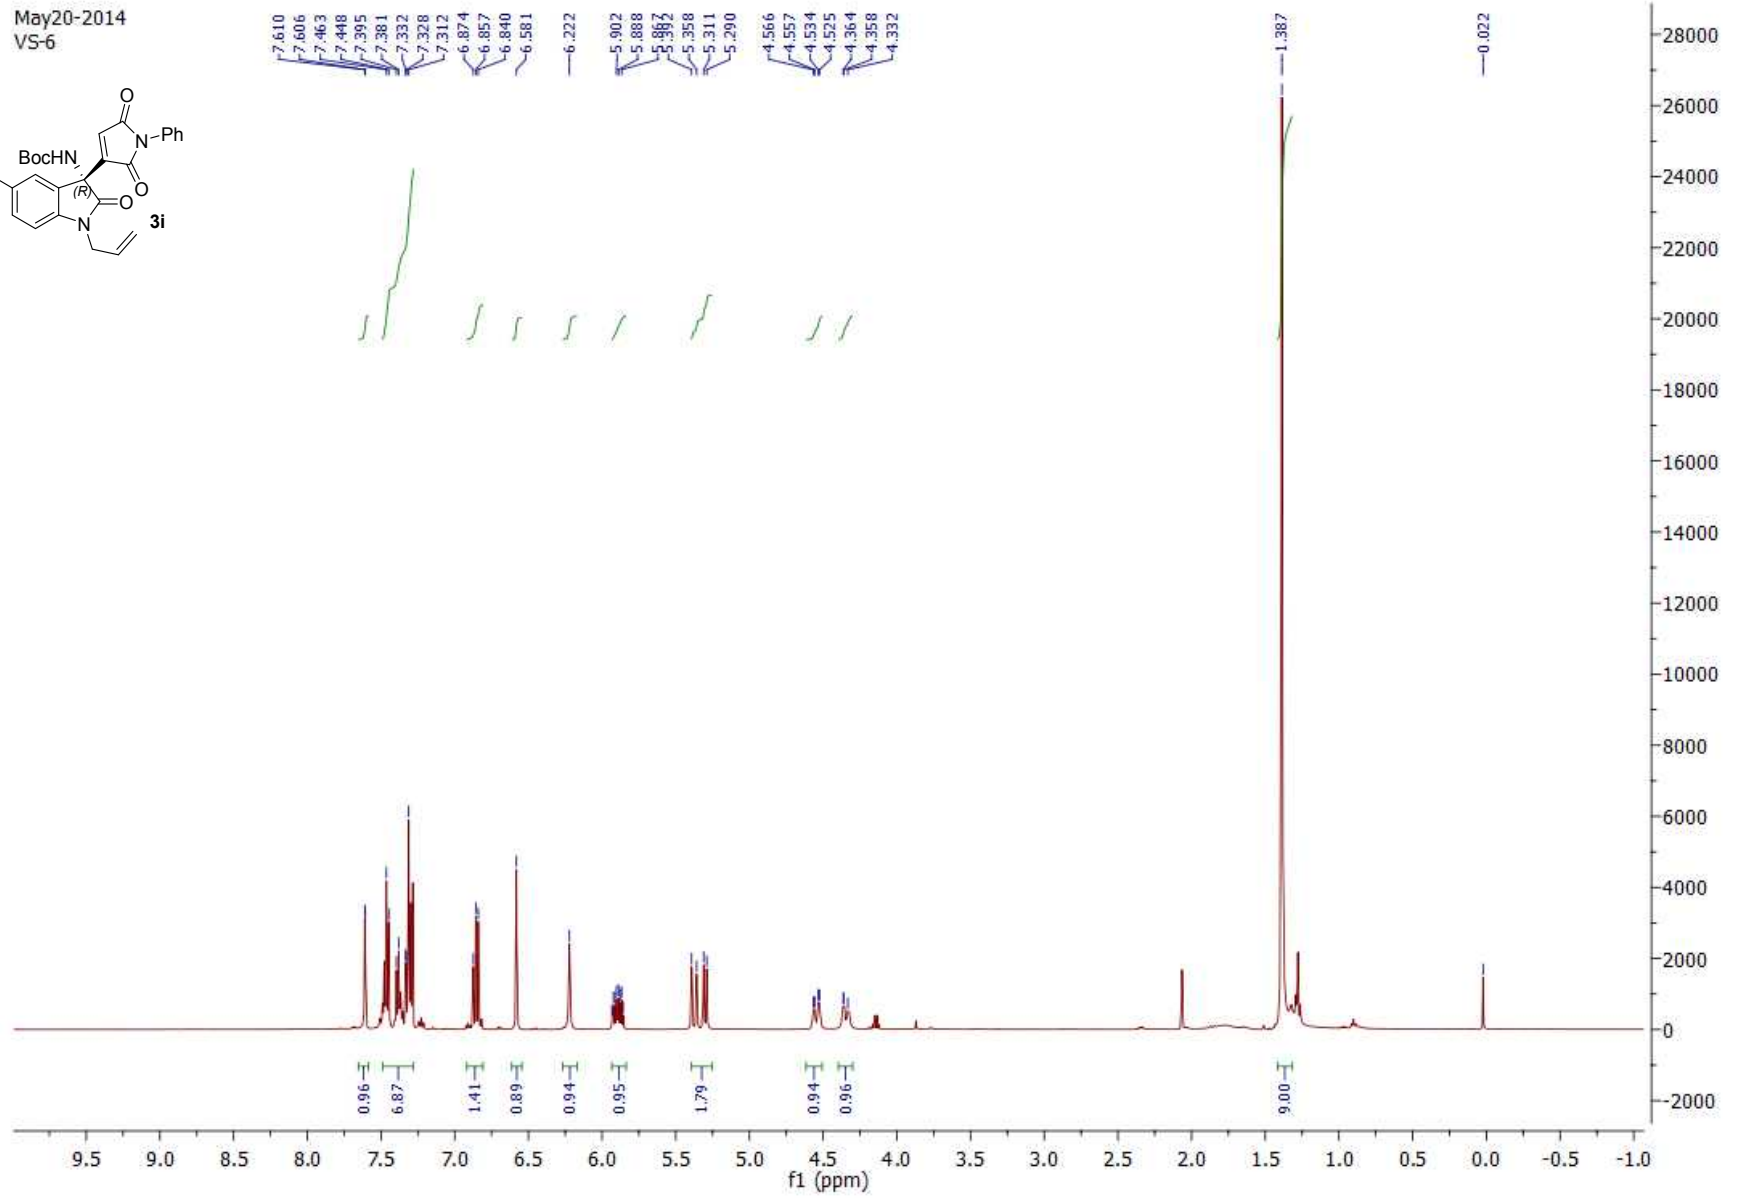



May20-2014  
VS-6

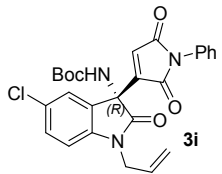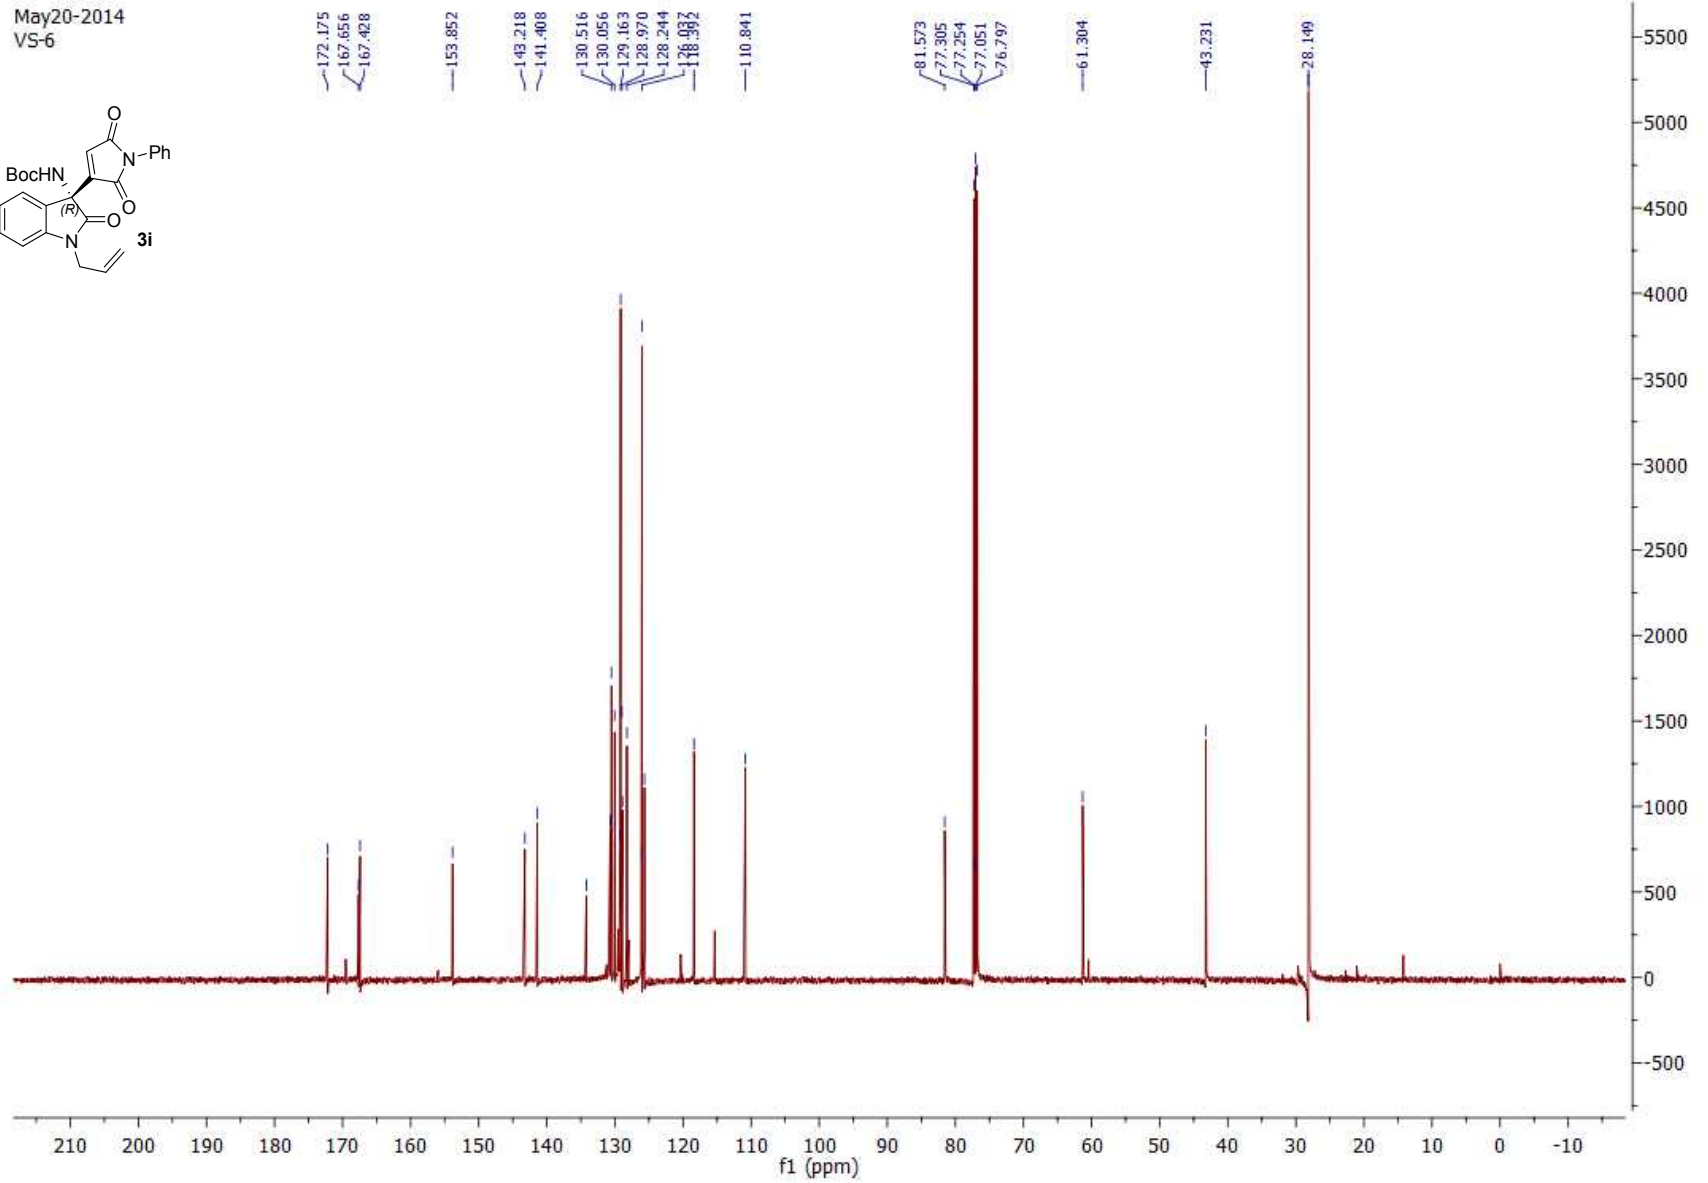

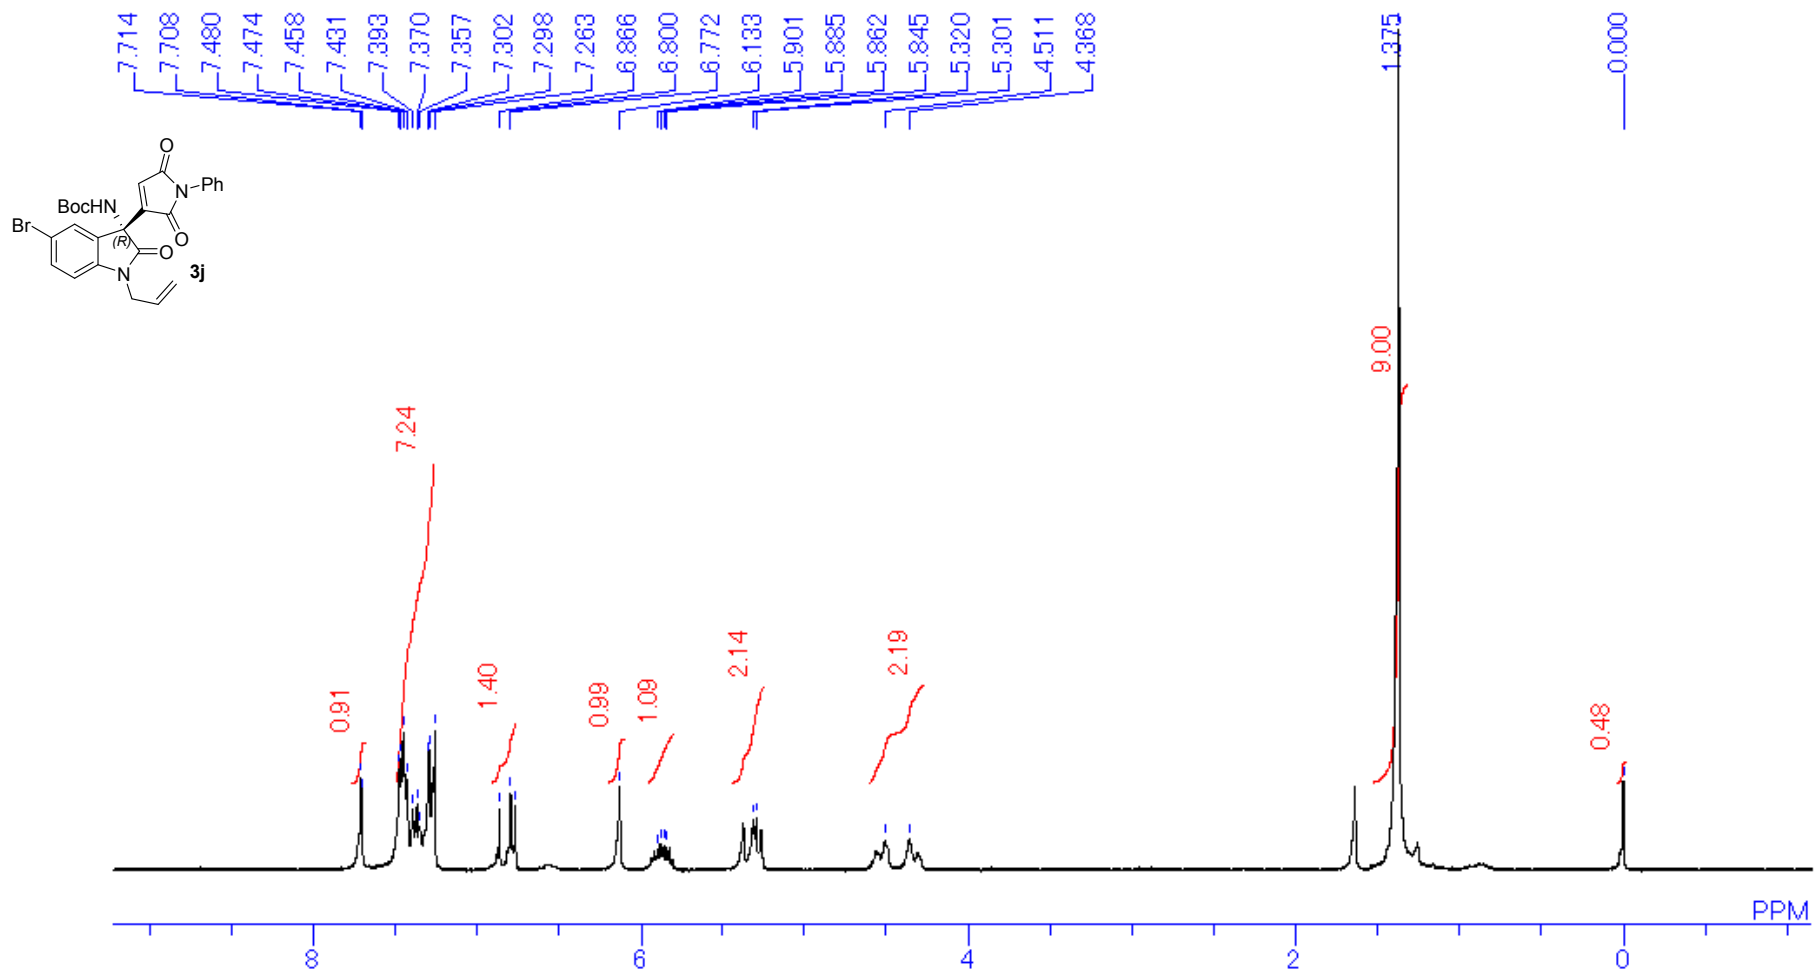

VS-A-3

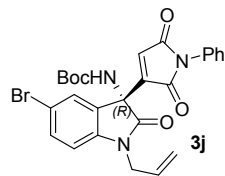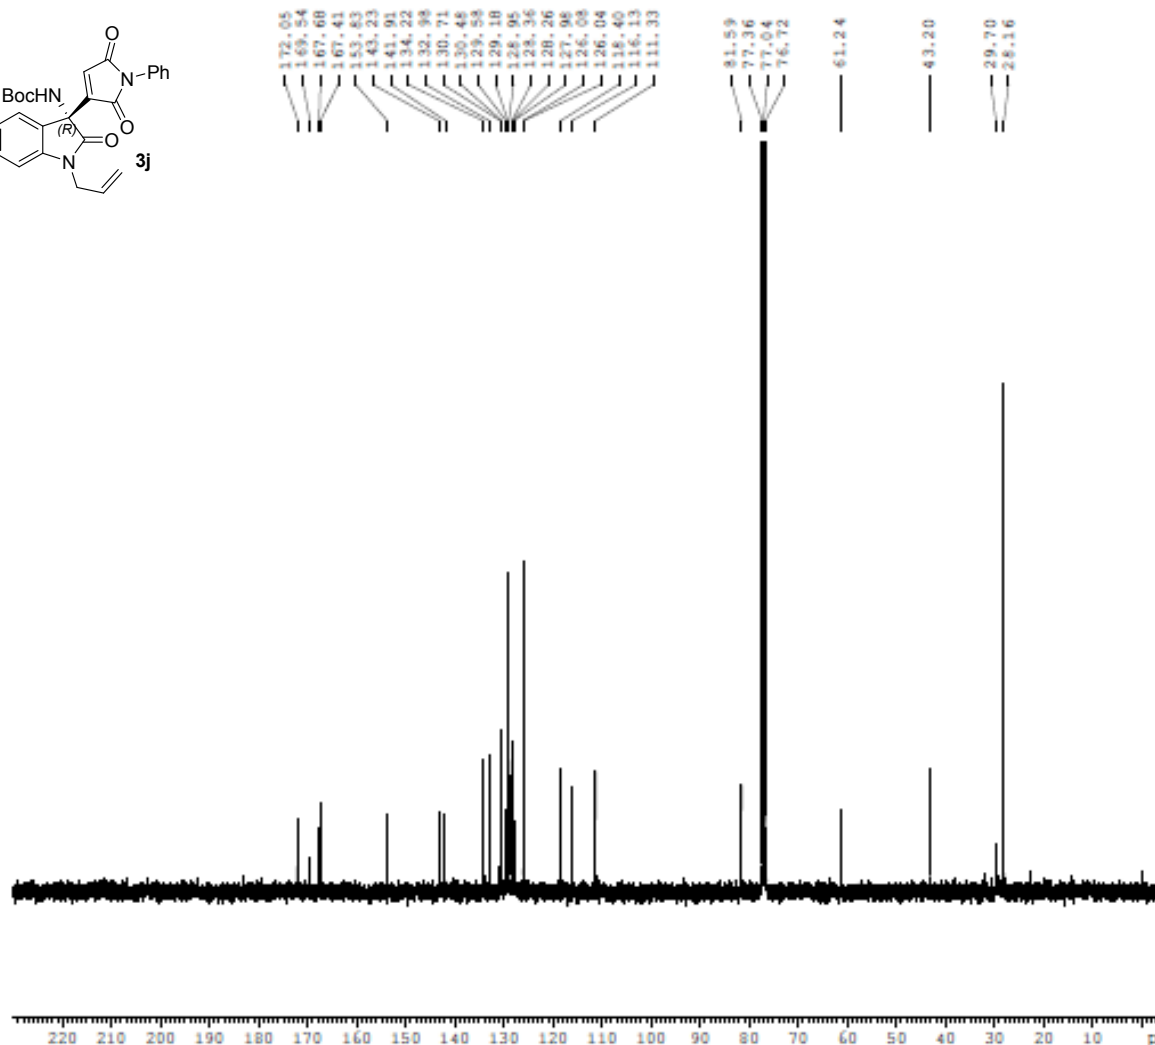

BRUKER  
 AVANCE II 400 NMR  
 Spectrometer  
 SAIF  
 Panjab University  
 Chandigarh

Current Data Parameters  
 NAME Mar25-2014  
 EXPNO 340  
 PROCNO 1

F2 - Acquisition Parameters  
 Date\_ 20140326  
 Time 4.52  
 INSTRUM spect  
 PROBHD 5 mm PABBO BB-  
 PULPROG zgpg30  
 ID 65536  
 SOLVENT CDCl3  
 NS 512  
 DS 4  
 SWH 29761.904 Hz  
 FIDRES 0.454131 Hz  
 AQ 1.1010548 sec  
 RC 912  
 DW 16.800 usec  
 DE 6.00 usec  
 TE 298.5 K  
 D1 2.00000000 sec  
 d11 0.03000000 sec  
 DELTA 1.89999998 sec  
 TDO 1

----- CHANNEL f1 -----  
 NUC1 13C  
 P1 9.60 usec  
 PL1 -2.00 dB  
 SFO1 100.6228298 MHz

----- CHANNEL f2 -----  
 CPDPRG2 waltz16  
 NUC2 1H  
 PCPD2 80.00 usec  
 PL2 -3.00 dB  
 PL12 14.31 dB  
 PL13 18.00 dB  
 SFO2 400.1316005 MHz

F2 - Processing parameters  
 SI 32768  
 SF 100.6127690 MHz  
 WDW EM  
 SSB 0  
 LB 1.00 Hz  
 GB 0  
 PC 1.40

avtar\_saifpu@yahoo.co.in

C:\Users\technologies\Desktop\maleimide nmrs\Dr\_Chimni\ CVSA41NON\_E1\_FT.als

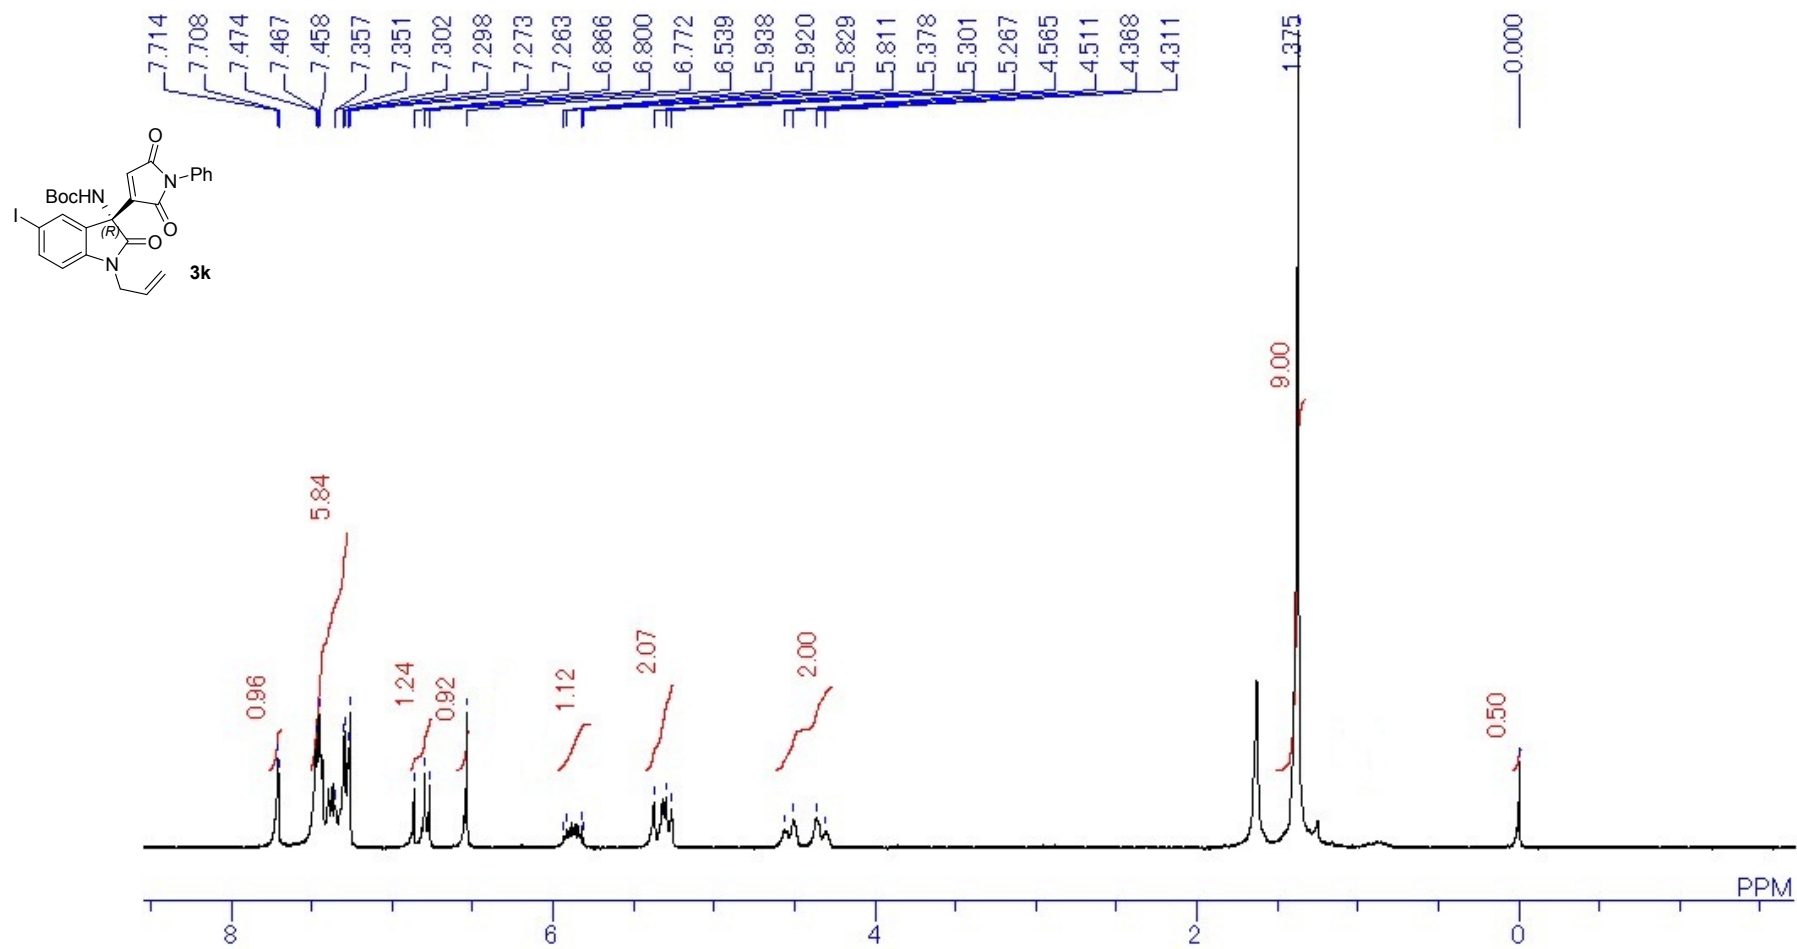

VSA-1

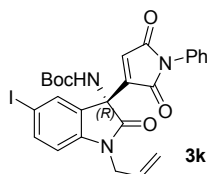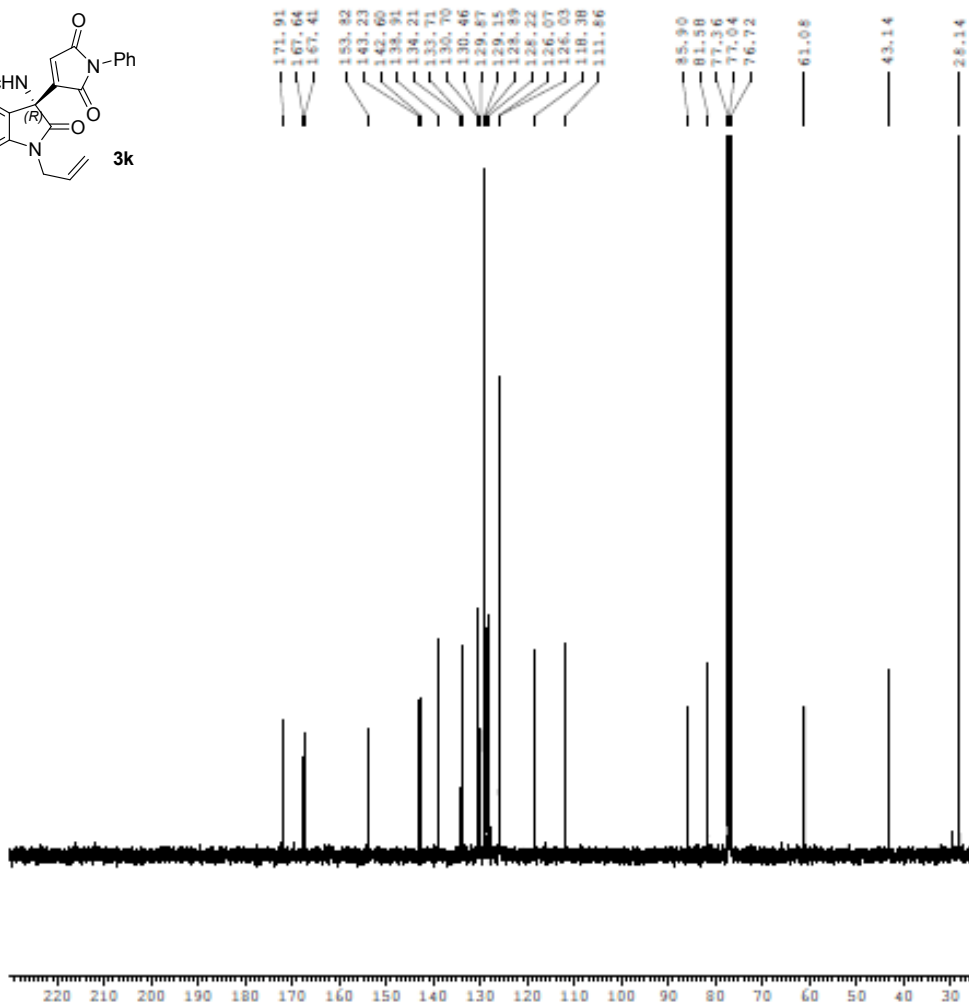

BRUKER  
AVANCE II 400 NMR  
Spectrometer  
SAIF  
Panjab University  
Chandigarh

Current Data Parameters  
NAME Mar25-2014  
EXPNO 360  
PROCNO 1

F2 - Acquisition Parameters  
Date\_ 20140326  
Time 5.57  
INSTRUM spect  
PROBHD 5 mm PABBO BB-  
PULPROG zgpg30  
TD 55536  
SOLVENT CDCl3  
NS 512  
DS 4  
SWH 29761.904 Hz  
FIDRES 0.454131 Hz  
AQ 1.1010548 sec  
RG 724  
EW 16.800 usec  
DE 6.00 usec  
TE 298.5 K  
D1 2.00000000 sec  
d11 0.03000000 sec  
DELTA 1.89999998 sec  
TD0 1

----- CHANNEL f1 -----  
NUC1 13C  
P1 9.60 usec  
PL1 -2.00 dB  
SFO1 100.6228298 MHz

----- CHANNEL f2 -----  
CPDPRG2 waltz16  
NUC2 1H  
PCPD2 80.00 usec  
PL2 -3.00 dB  
PL12 14.31 dB  
PL13 18.00 dB  
SFO2 400.1316005 MHz

F2 - Processing parameters  
SI 32768  
SF 100.6127709 MHz  
WDW EM  
SSB 0  
LB 1.00 Hz  
GB 0  
PC 1.40

avtar\_saifpu@yahoo.co.in

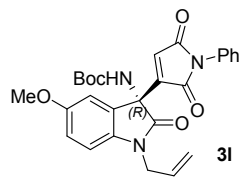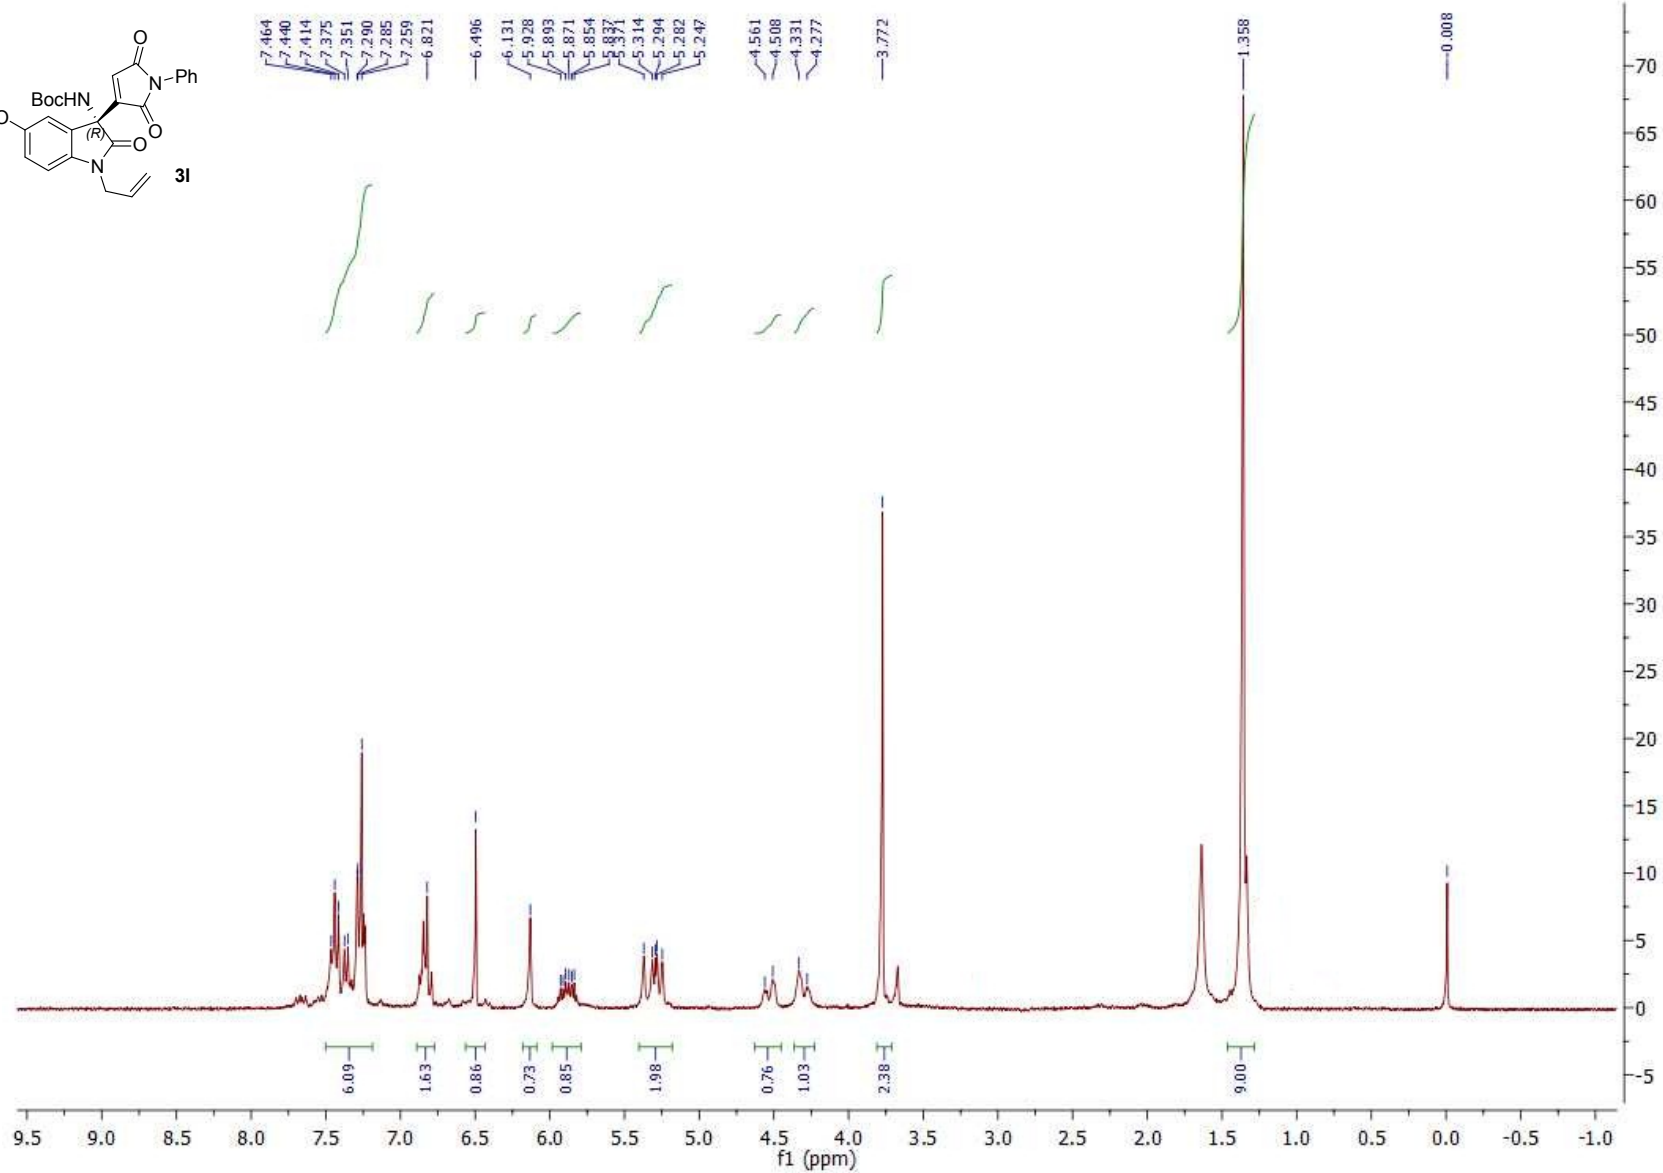

17 oct 2014  
VS-OMe

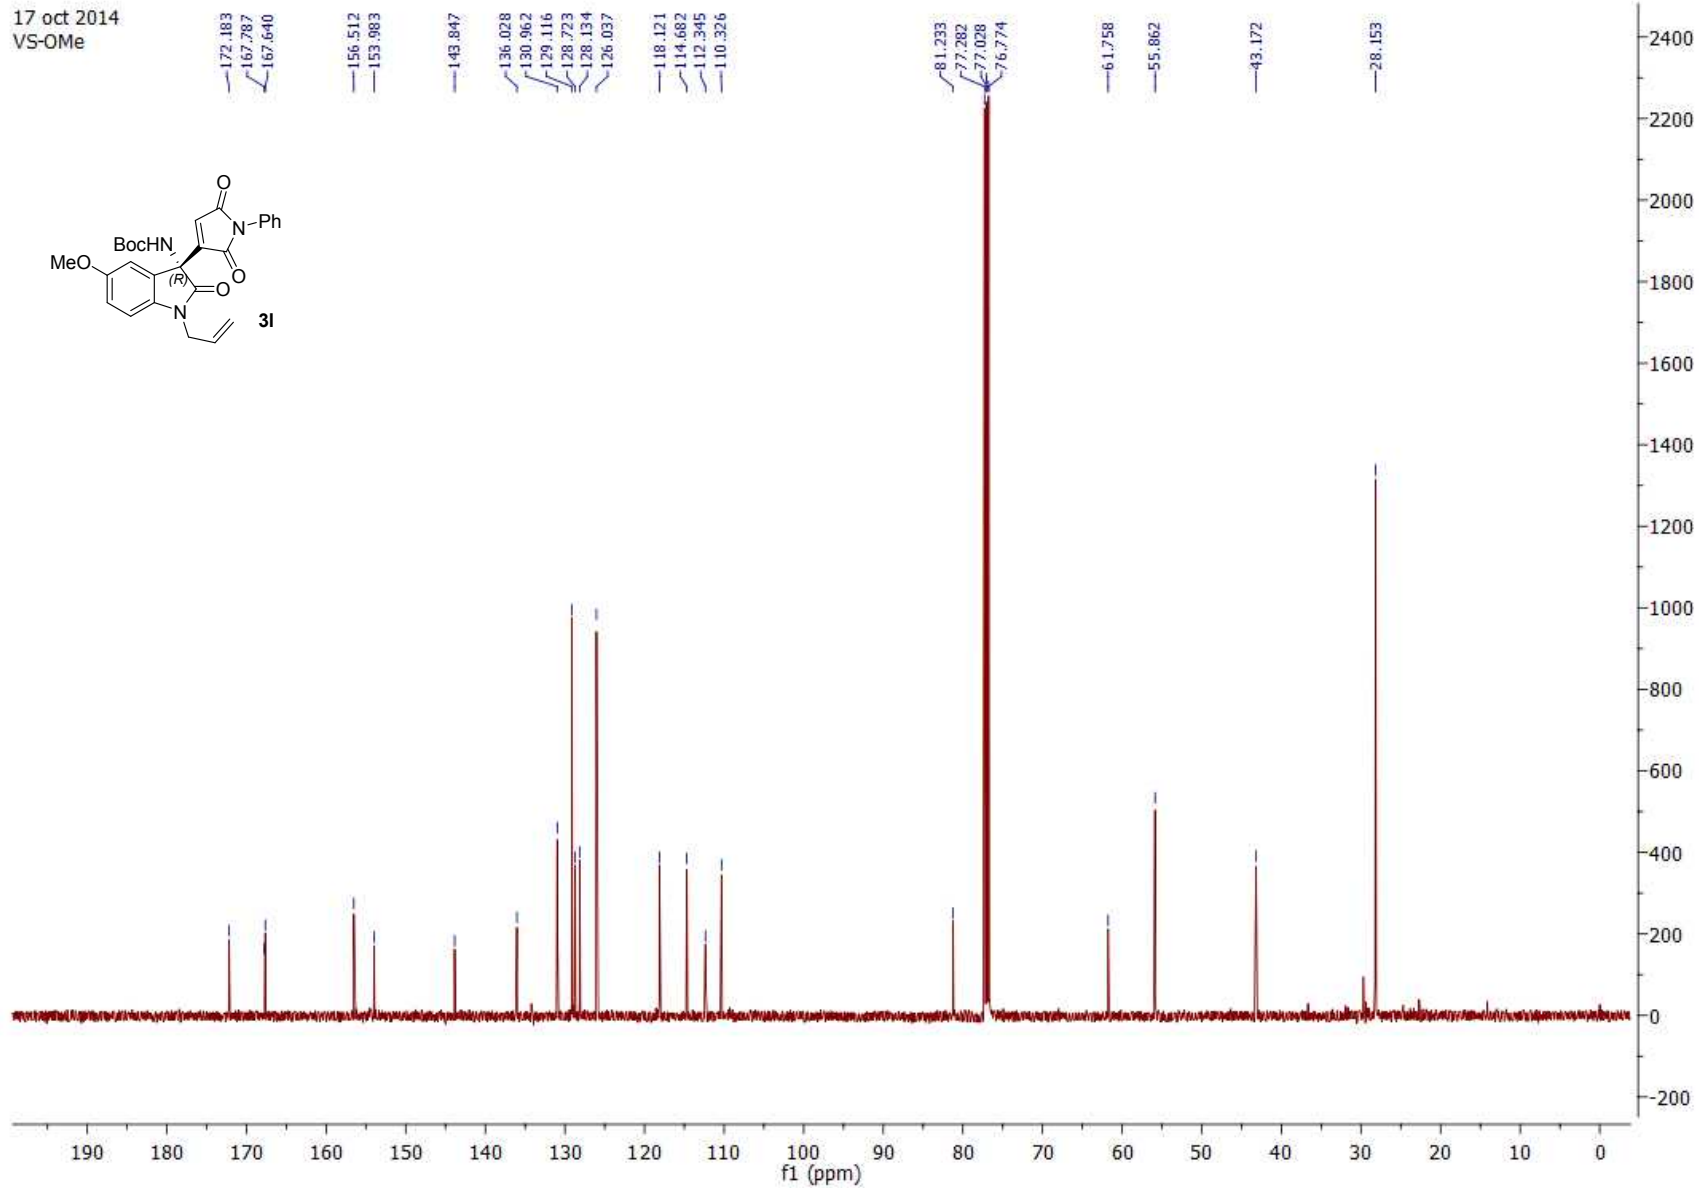

C:\Users\technologies\Desktop\malemide nmr\Dr\_Chimni\VSA2.als

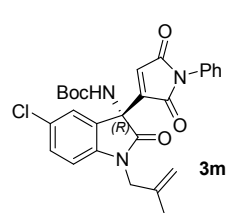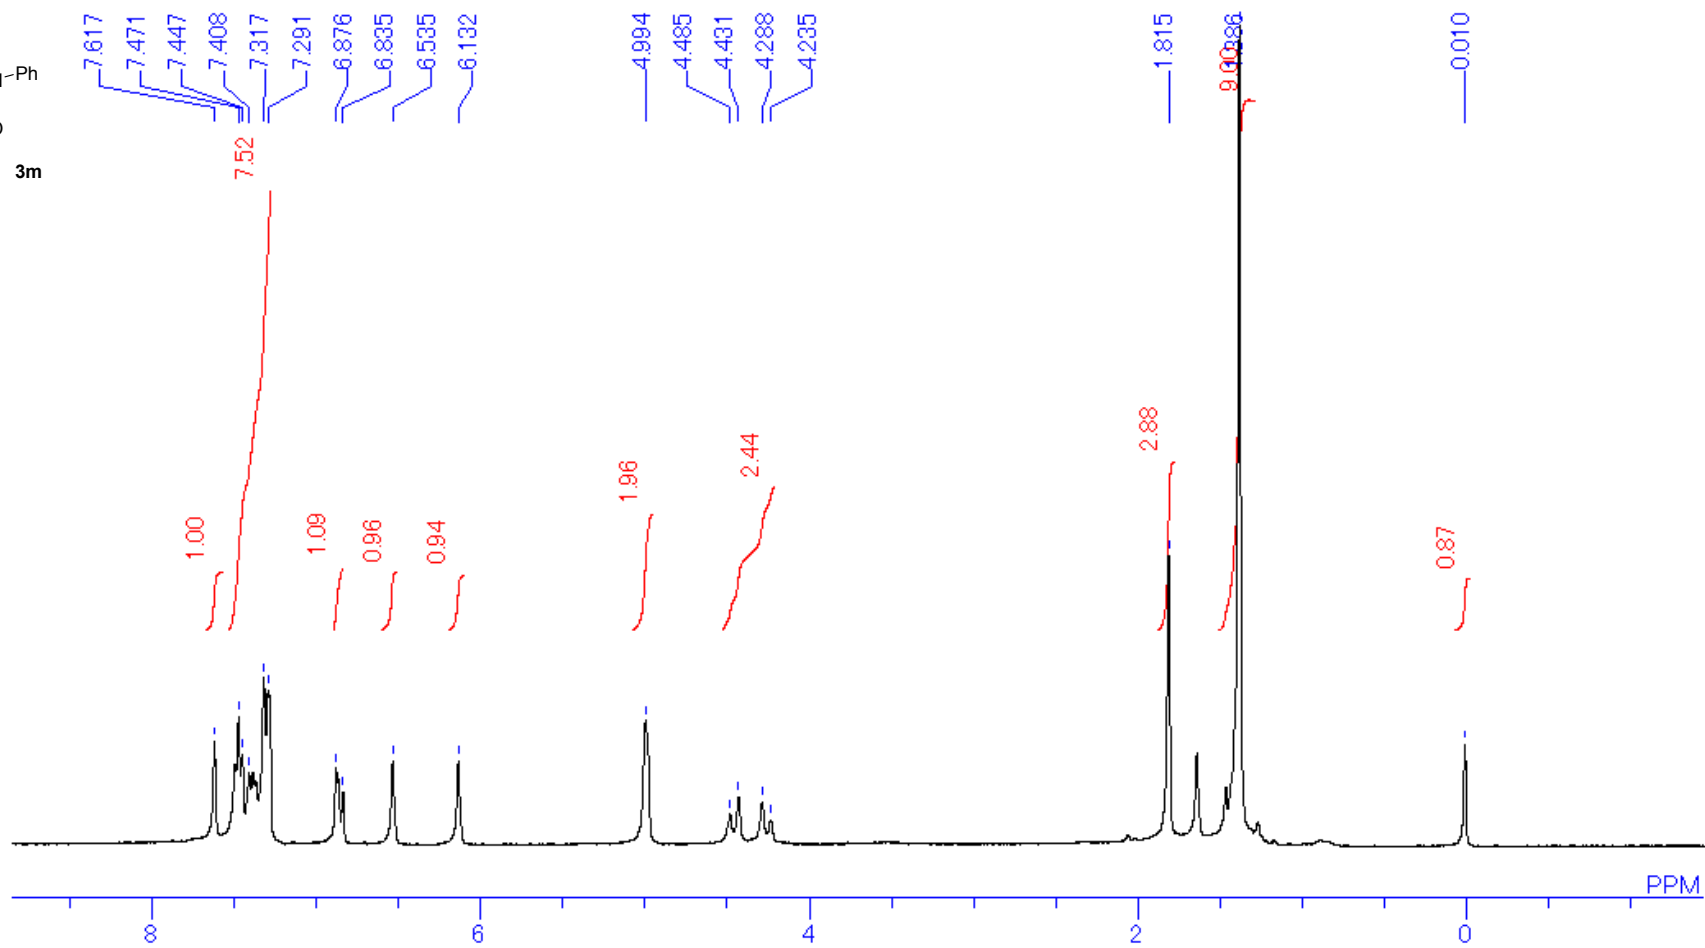



Apr09-2014  
VS-C-2

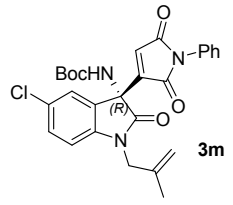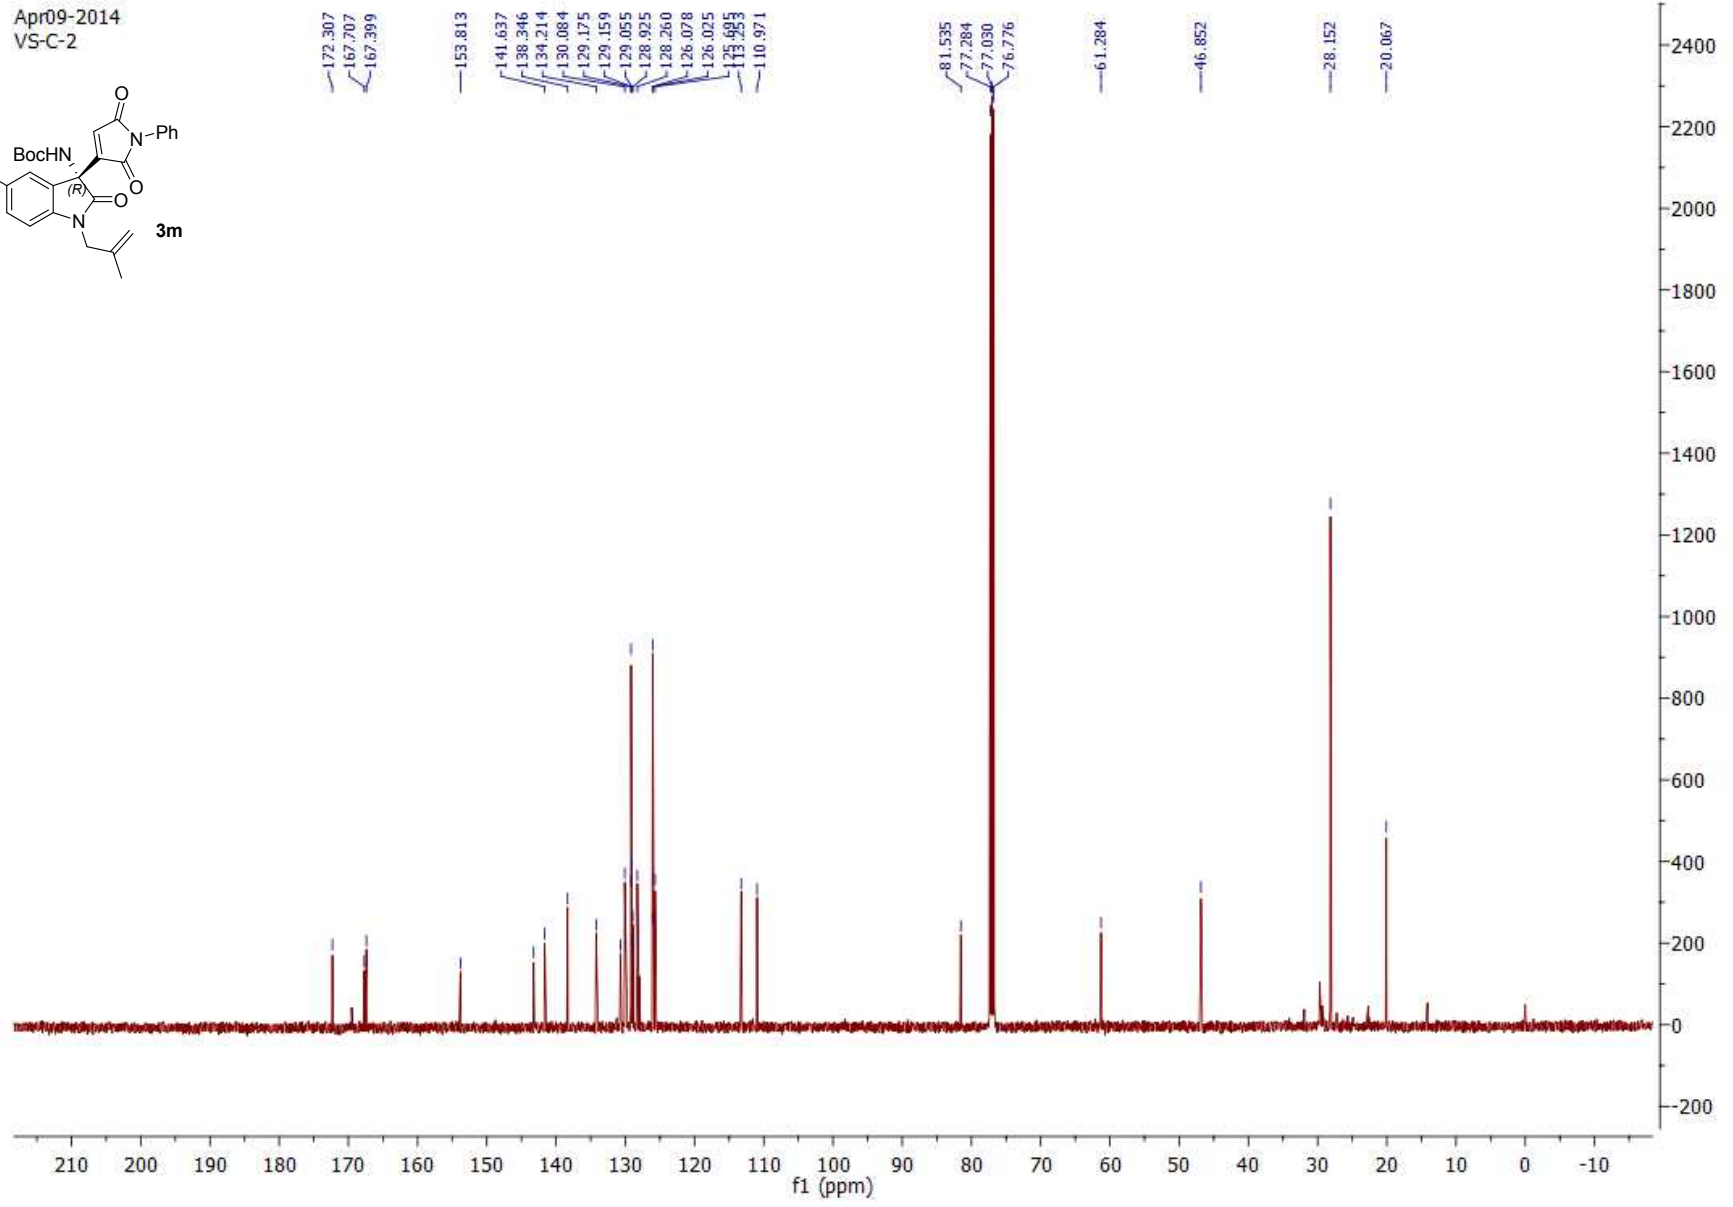

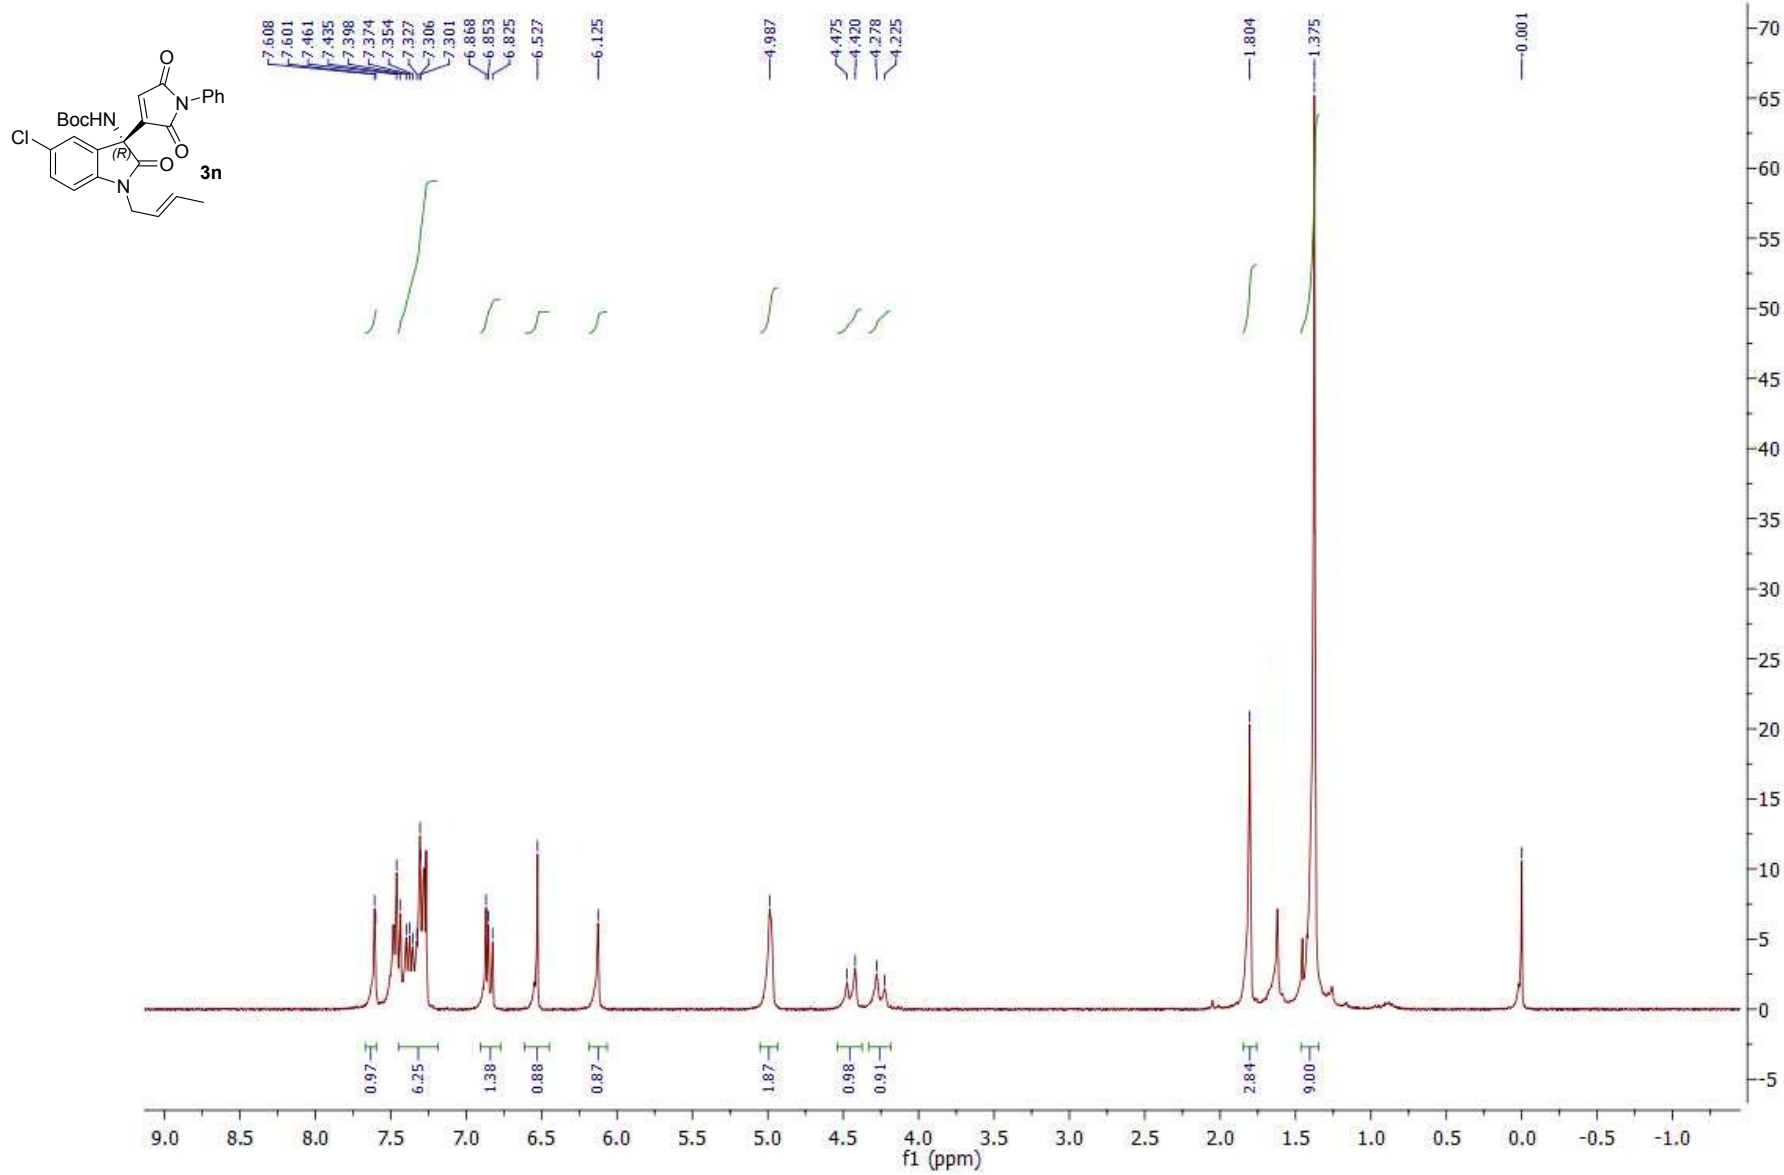

Apr07-2014  
VS-C-8

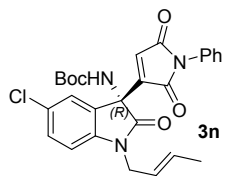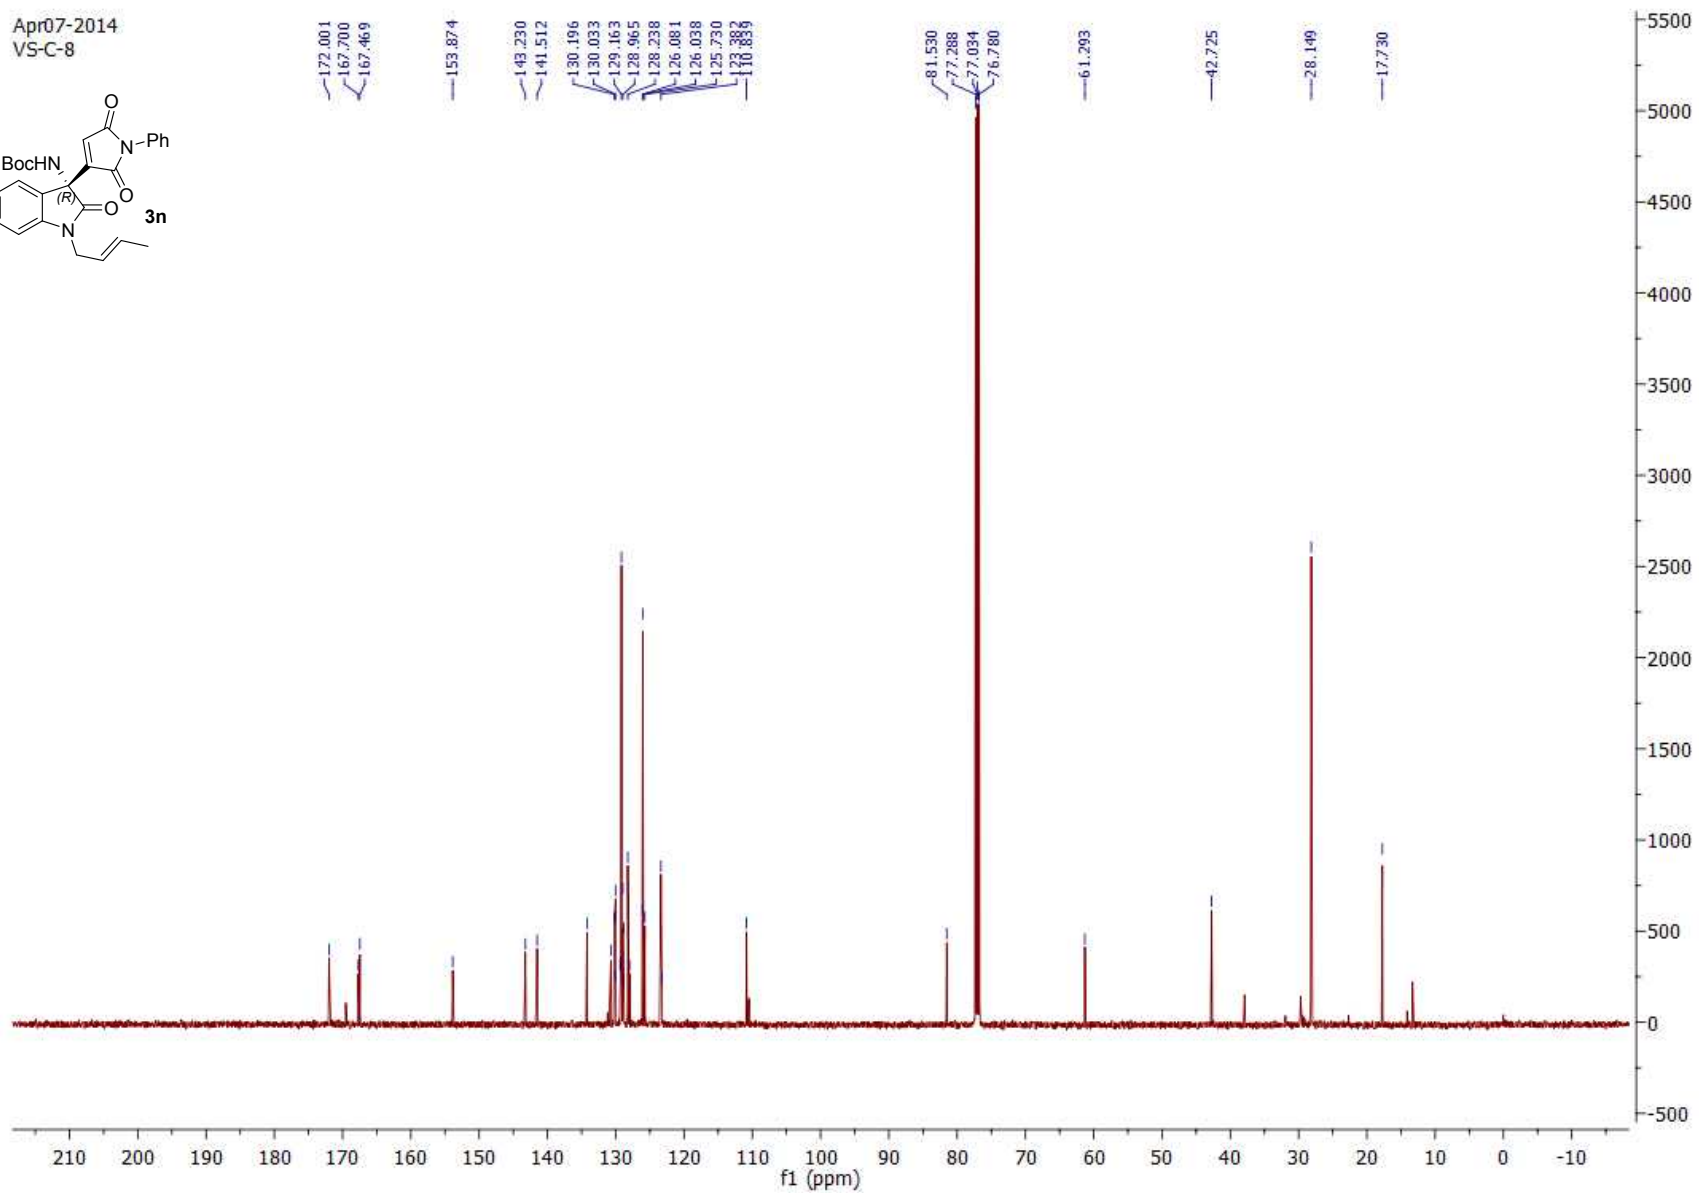

May21-2014  
VS-23

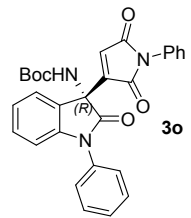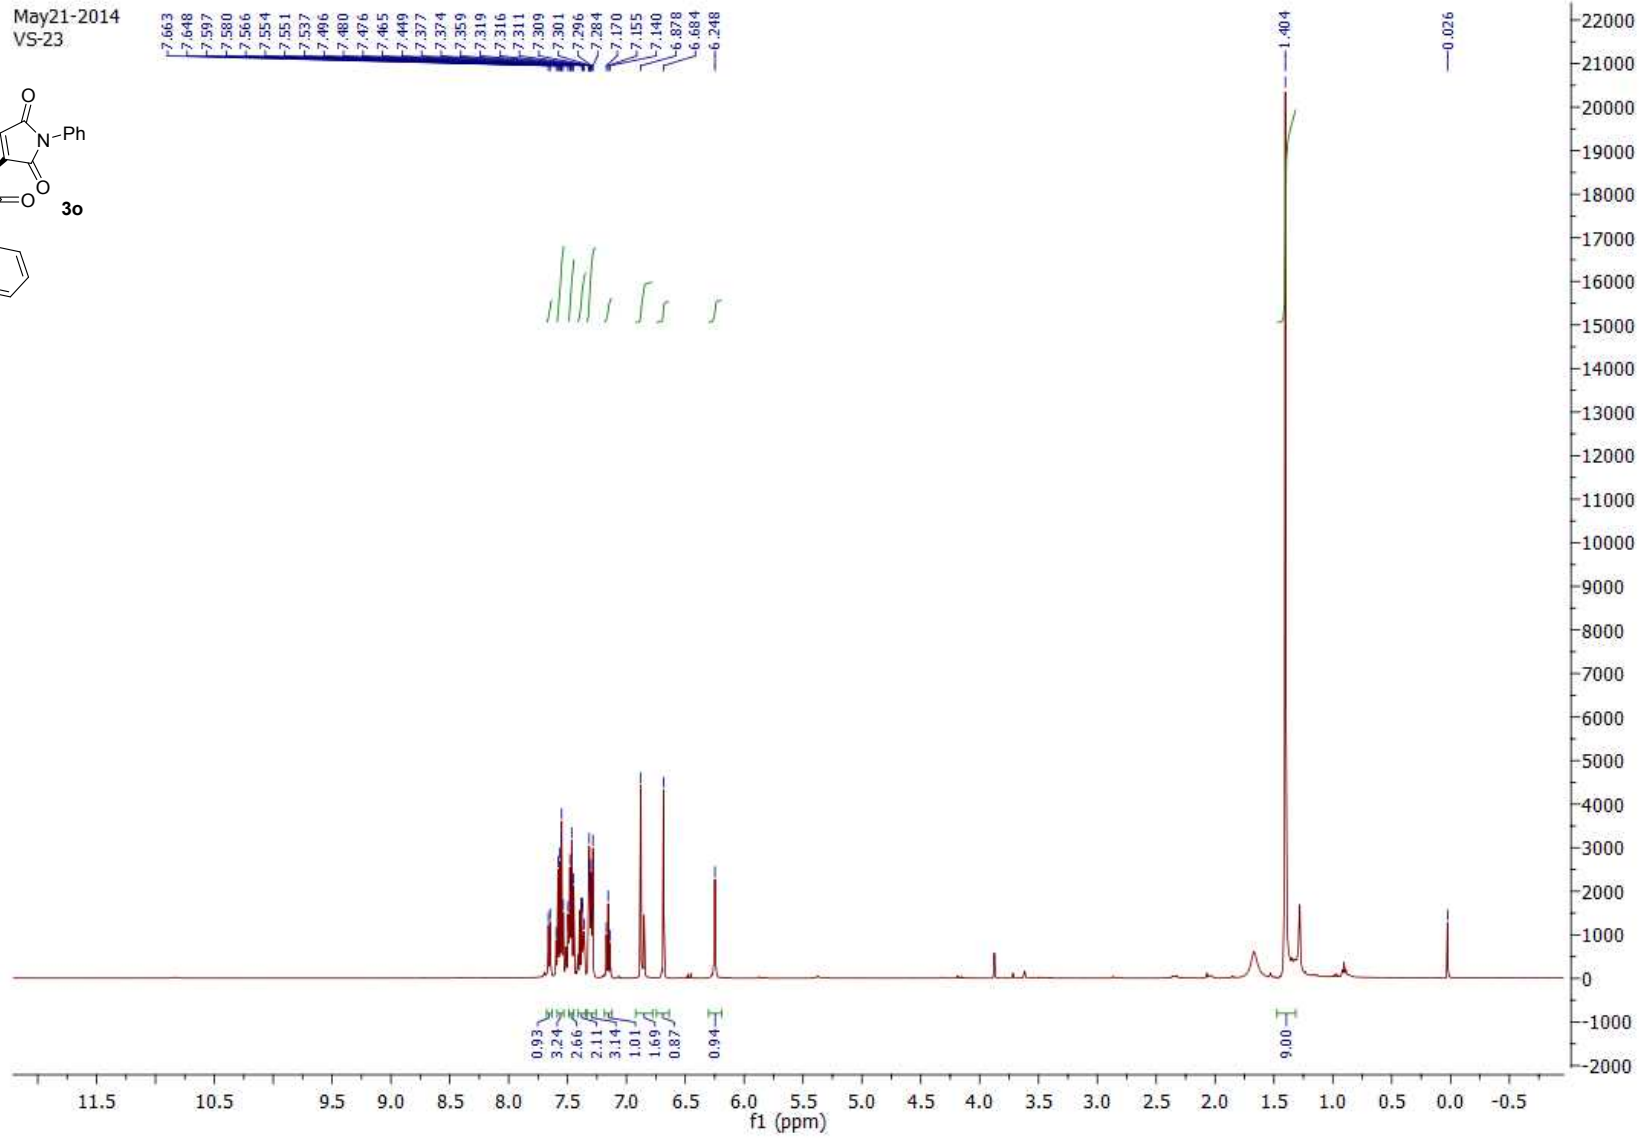

May21-2014  
VS-23

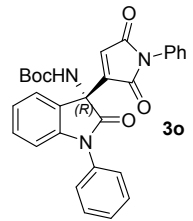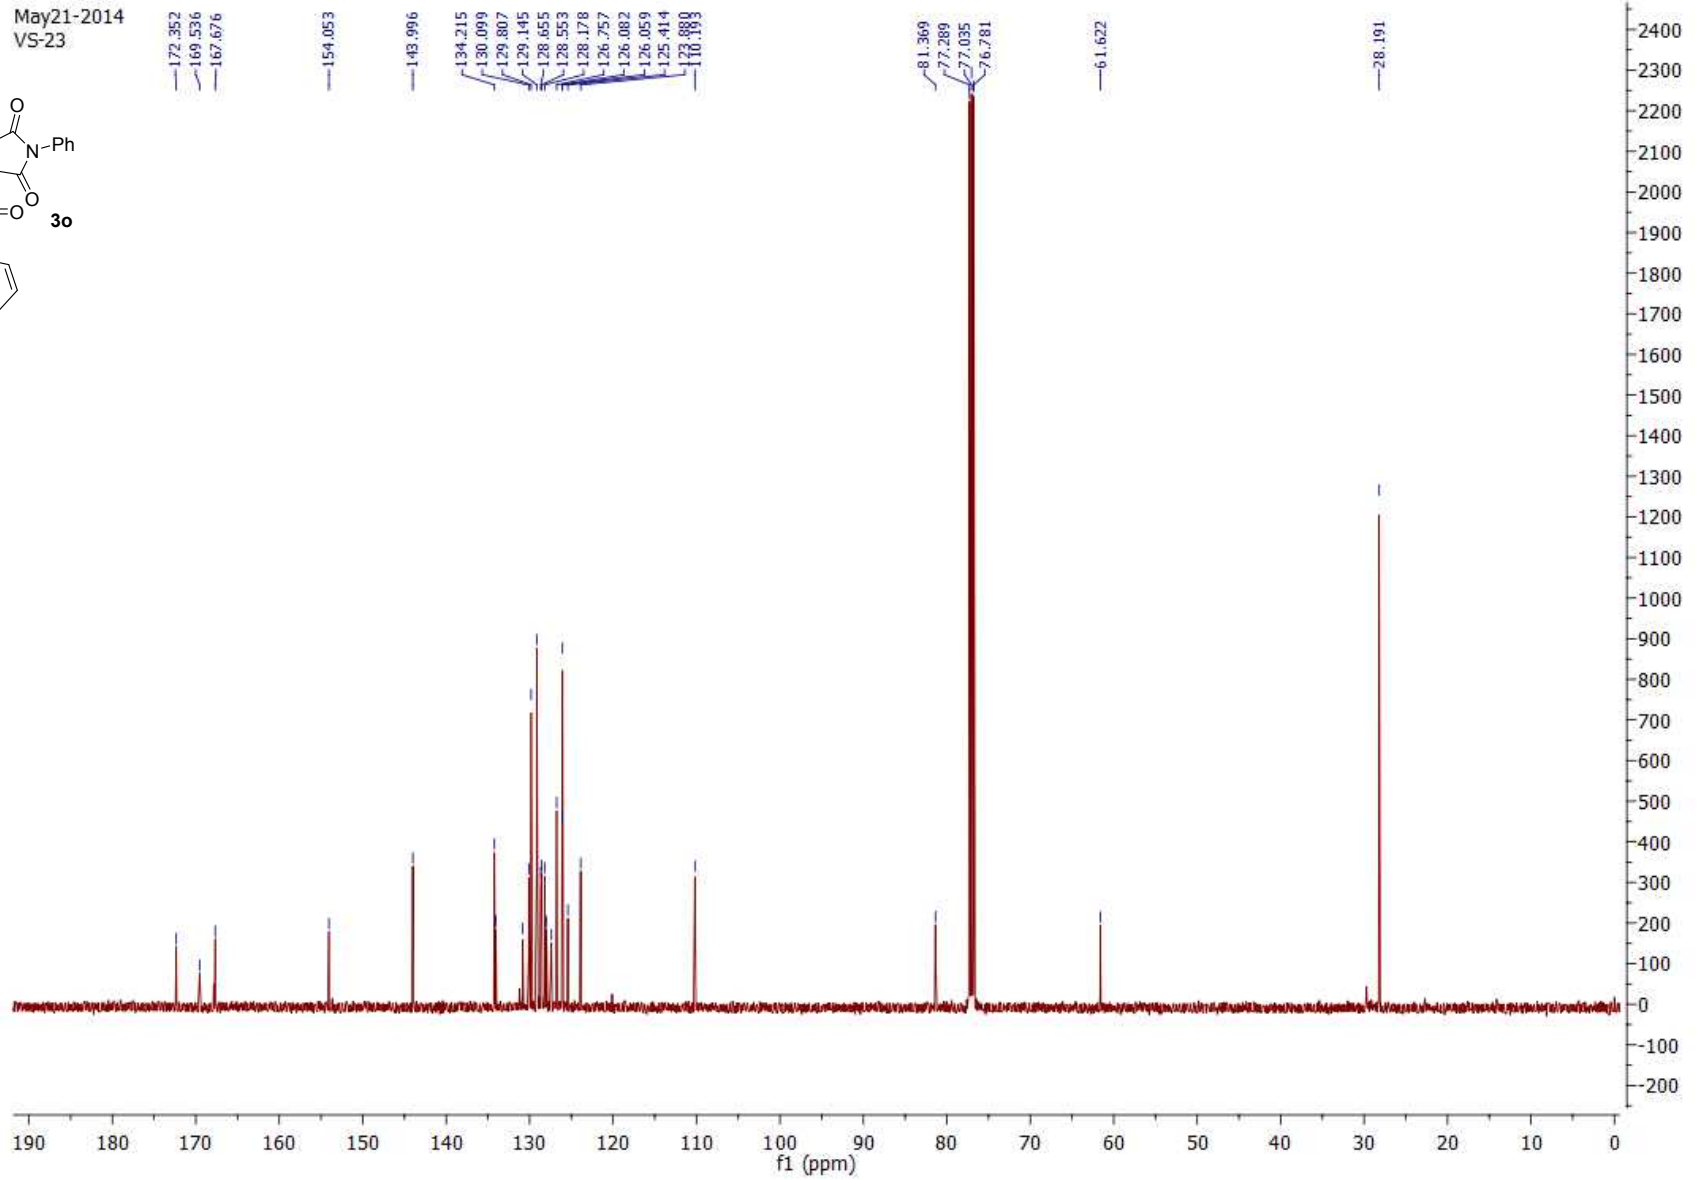

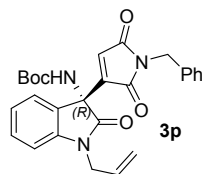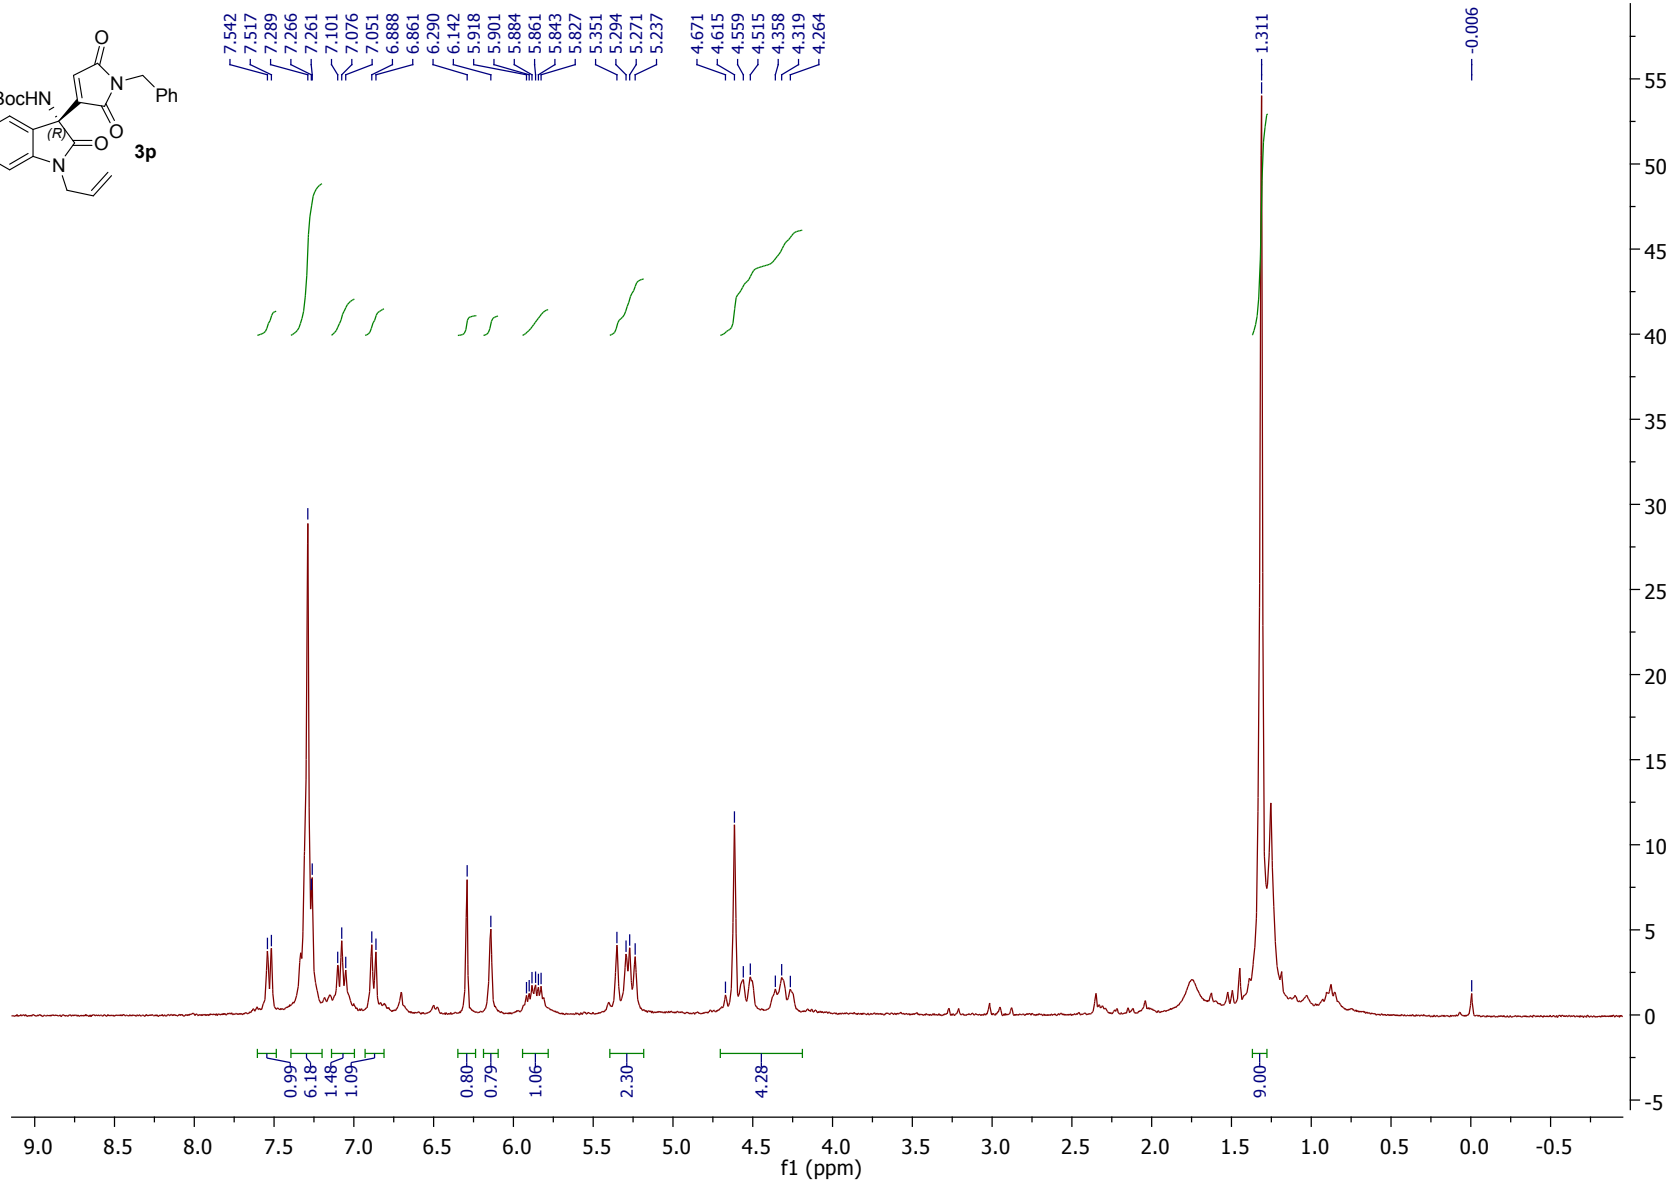

Apr10-2014  
VS-20

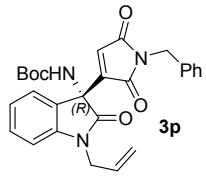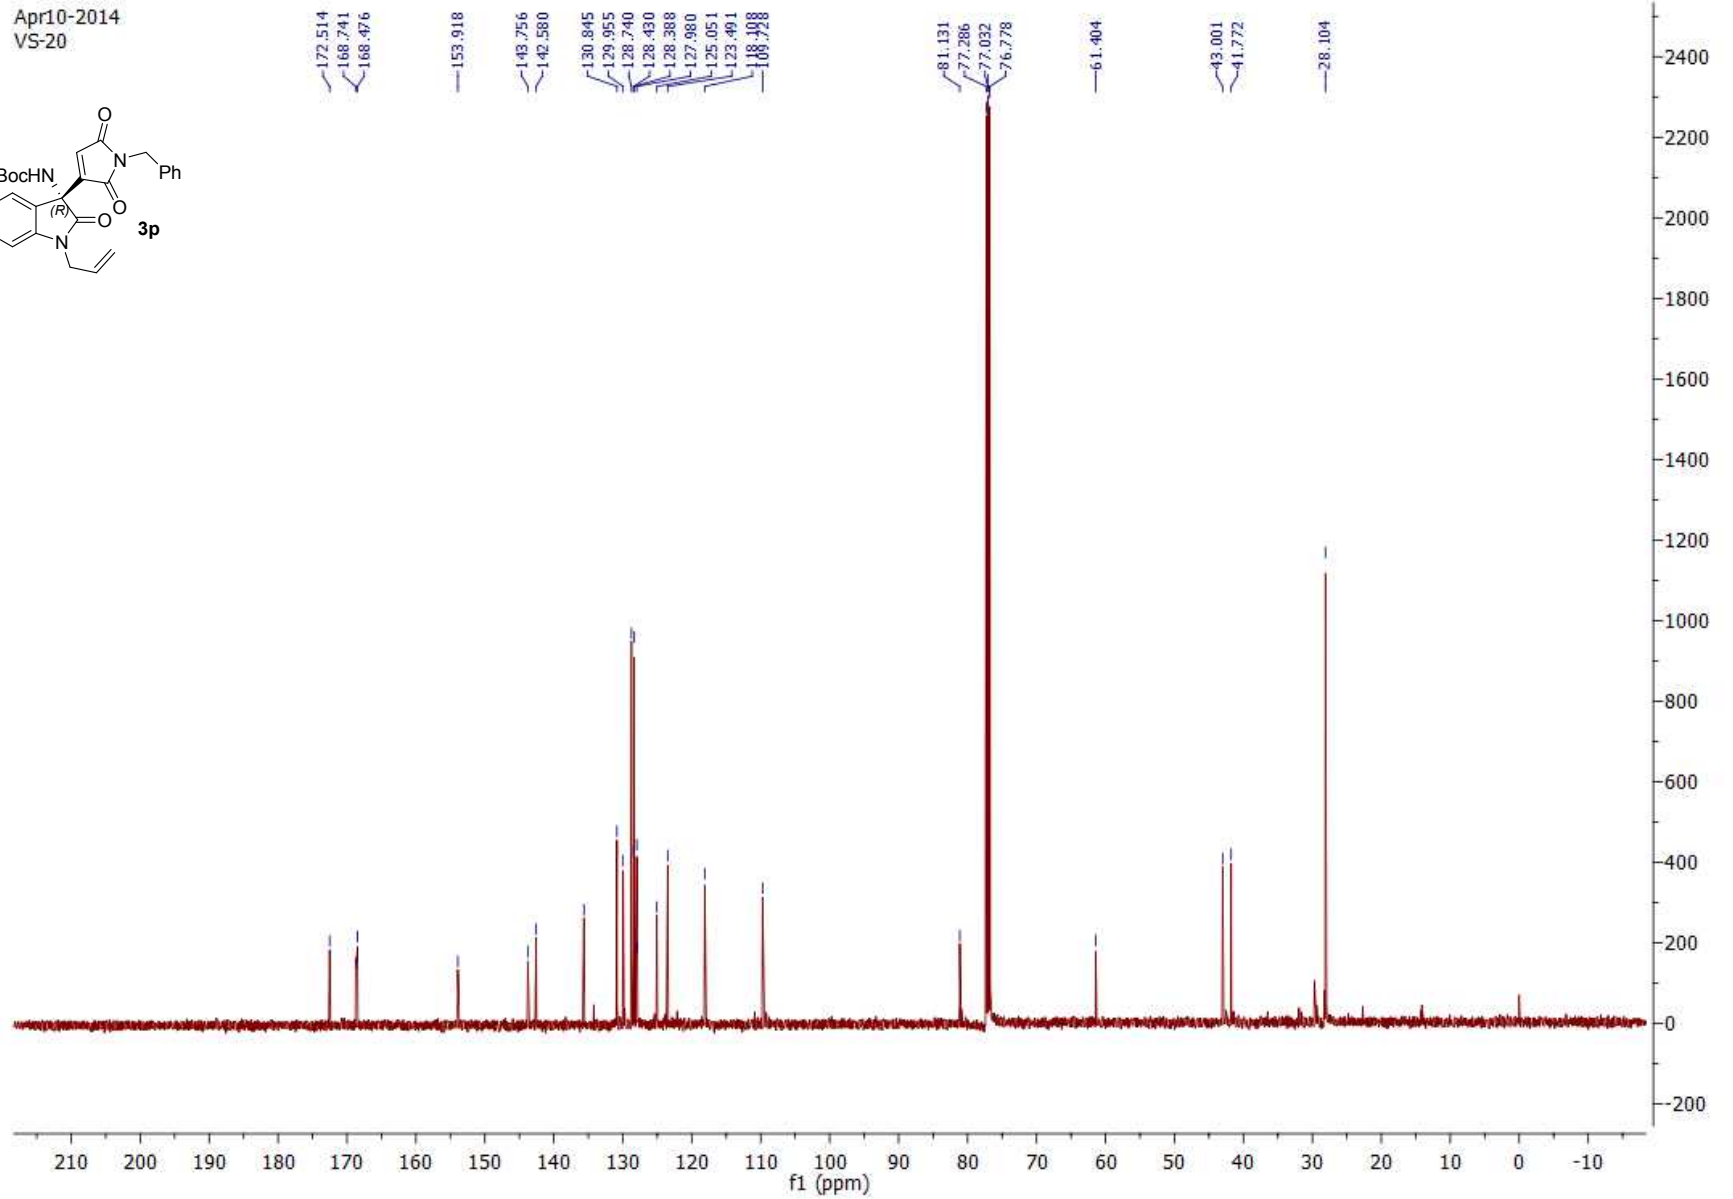

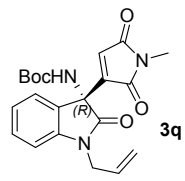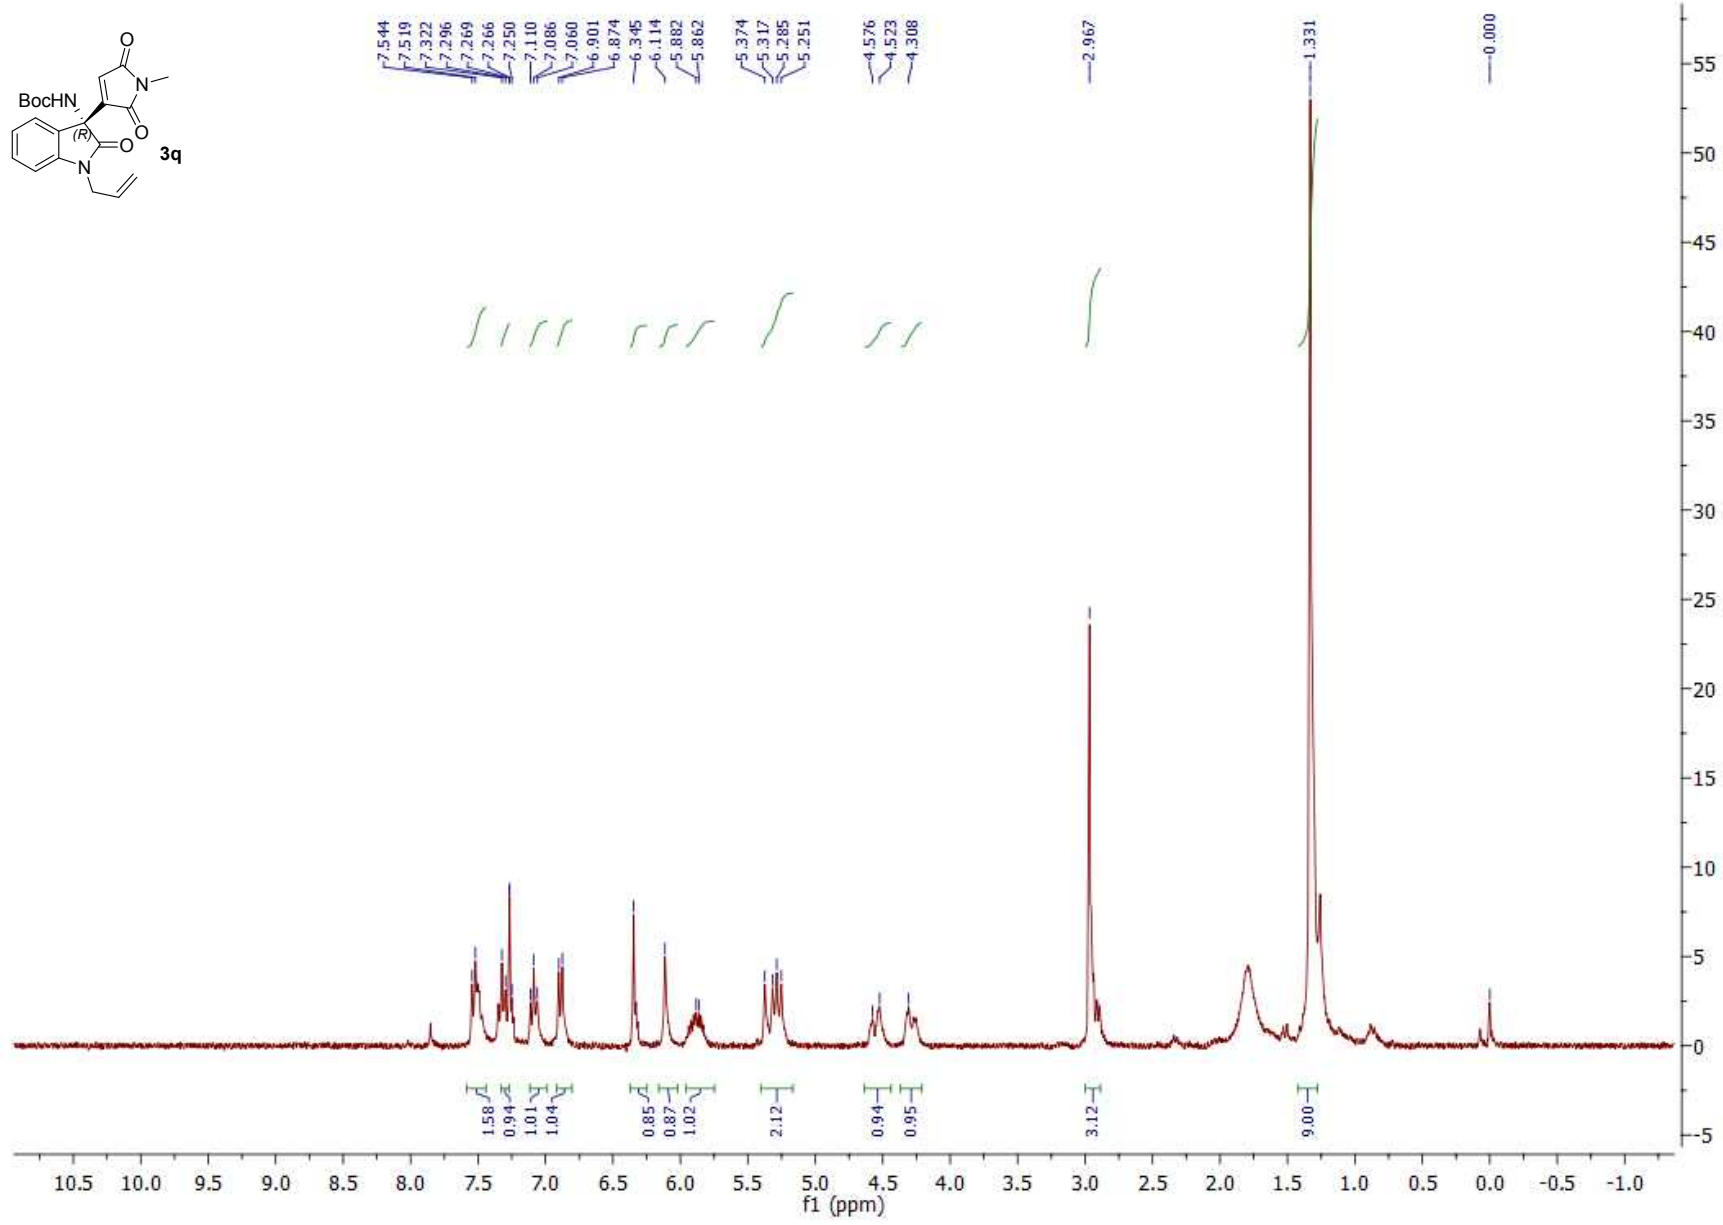



Apr03-2014  
VS-A-19

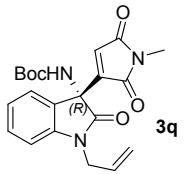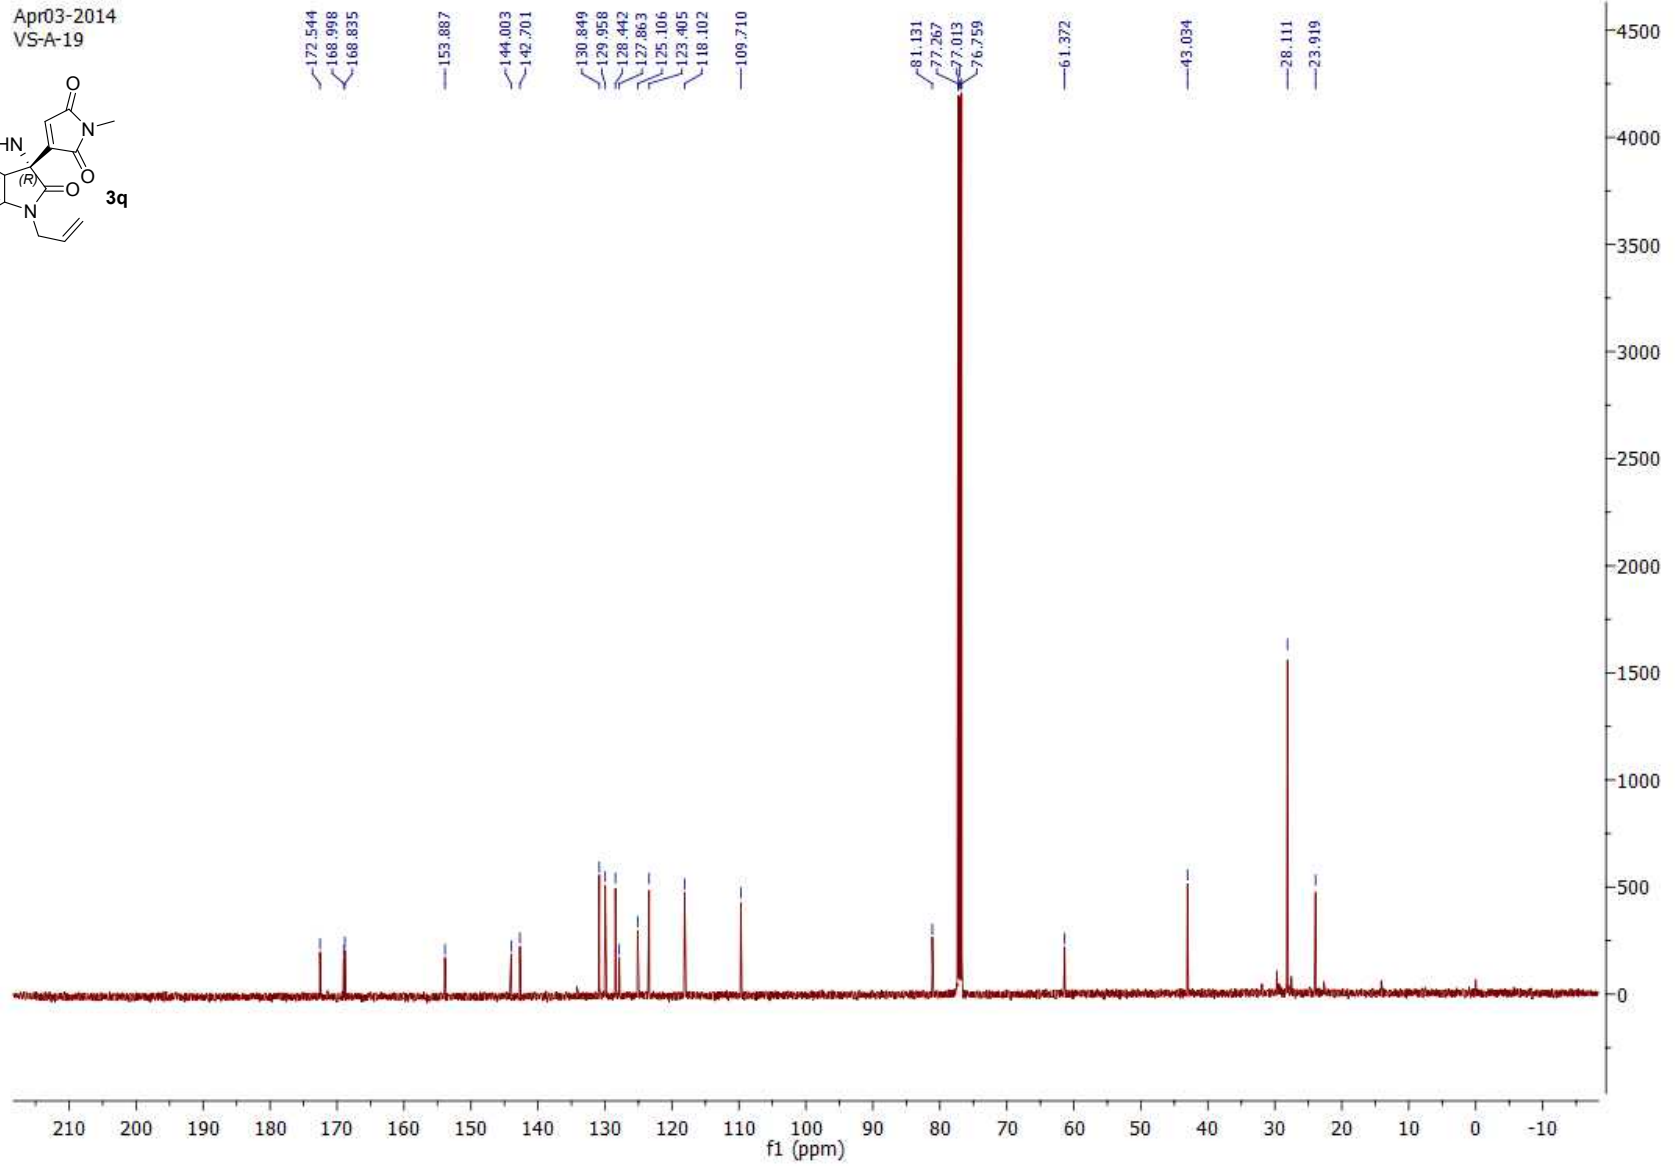

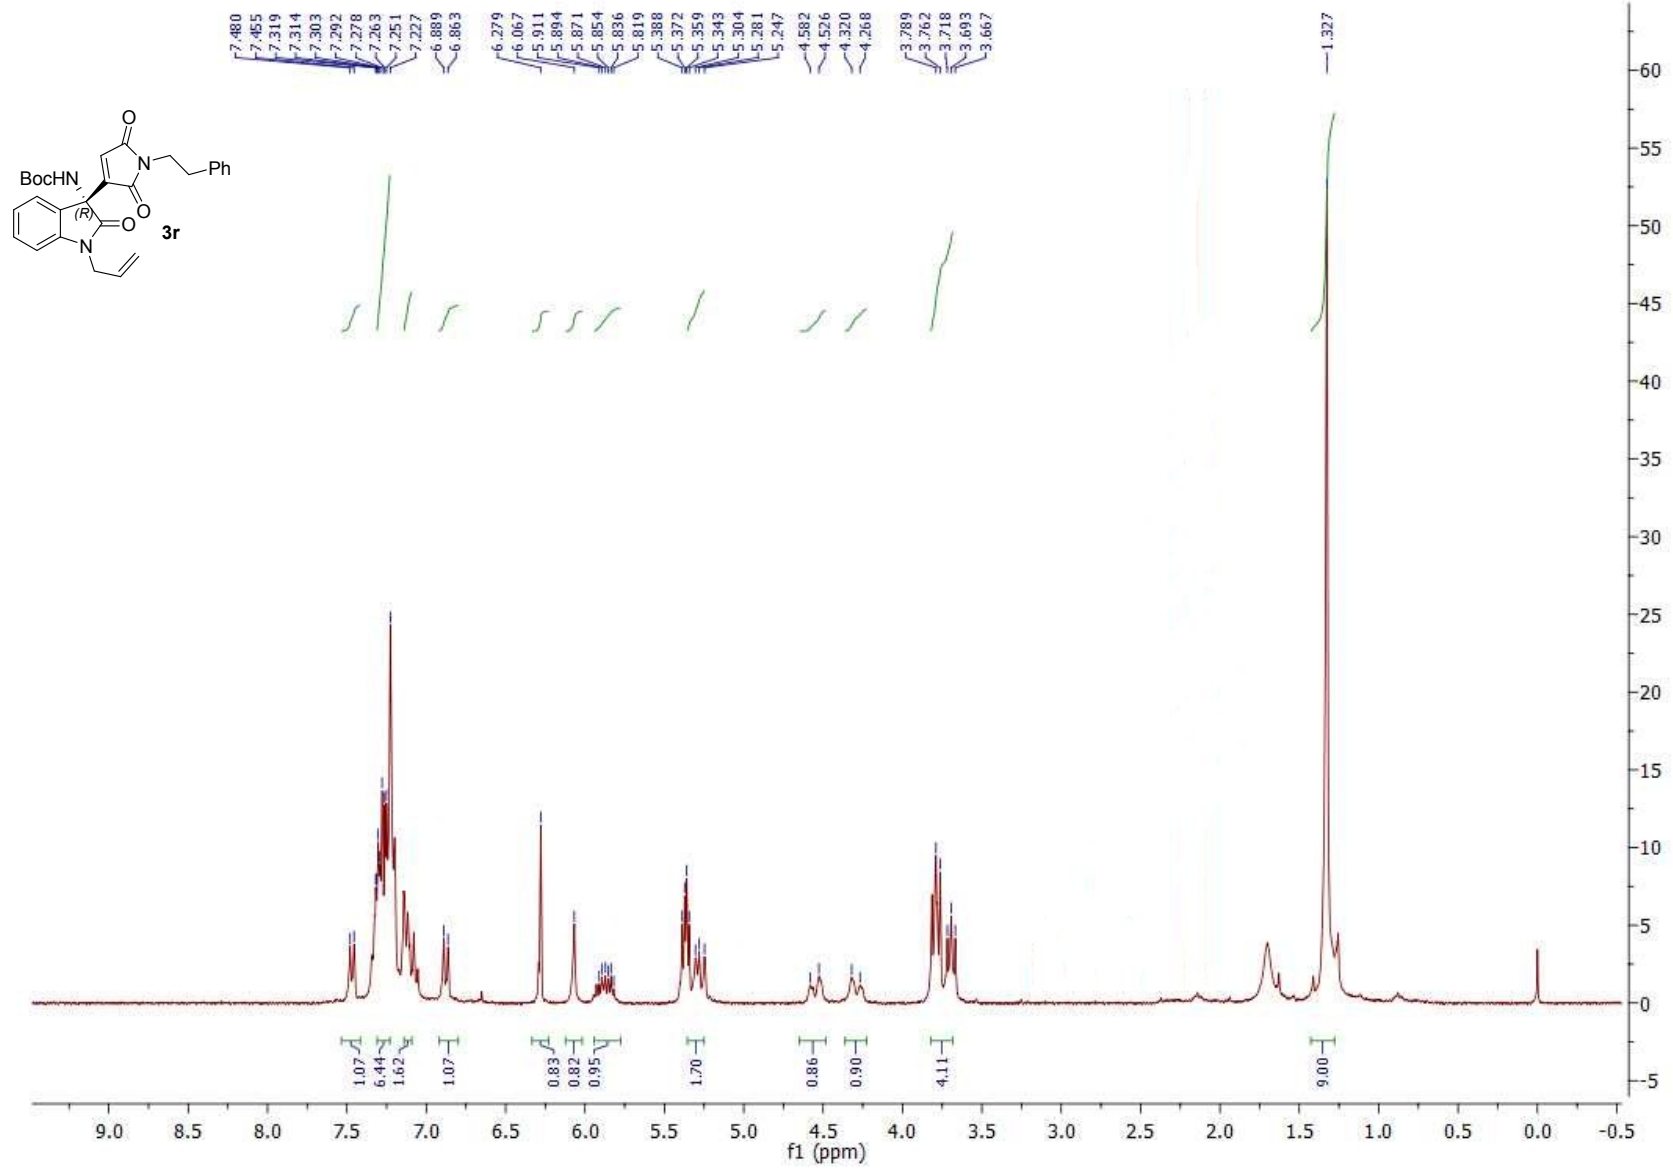

Apr10-2014  
VS-21

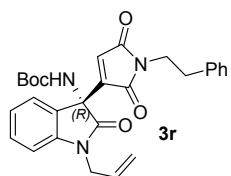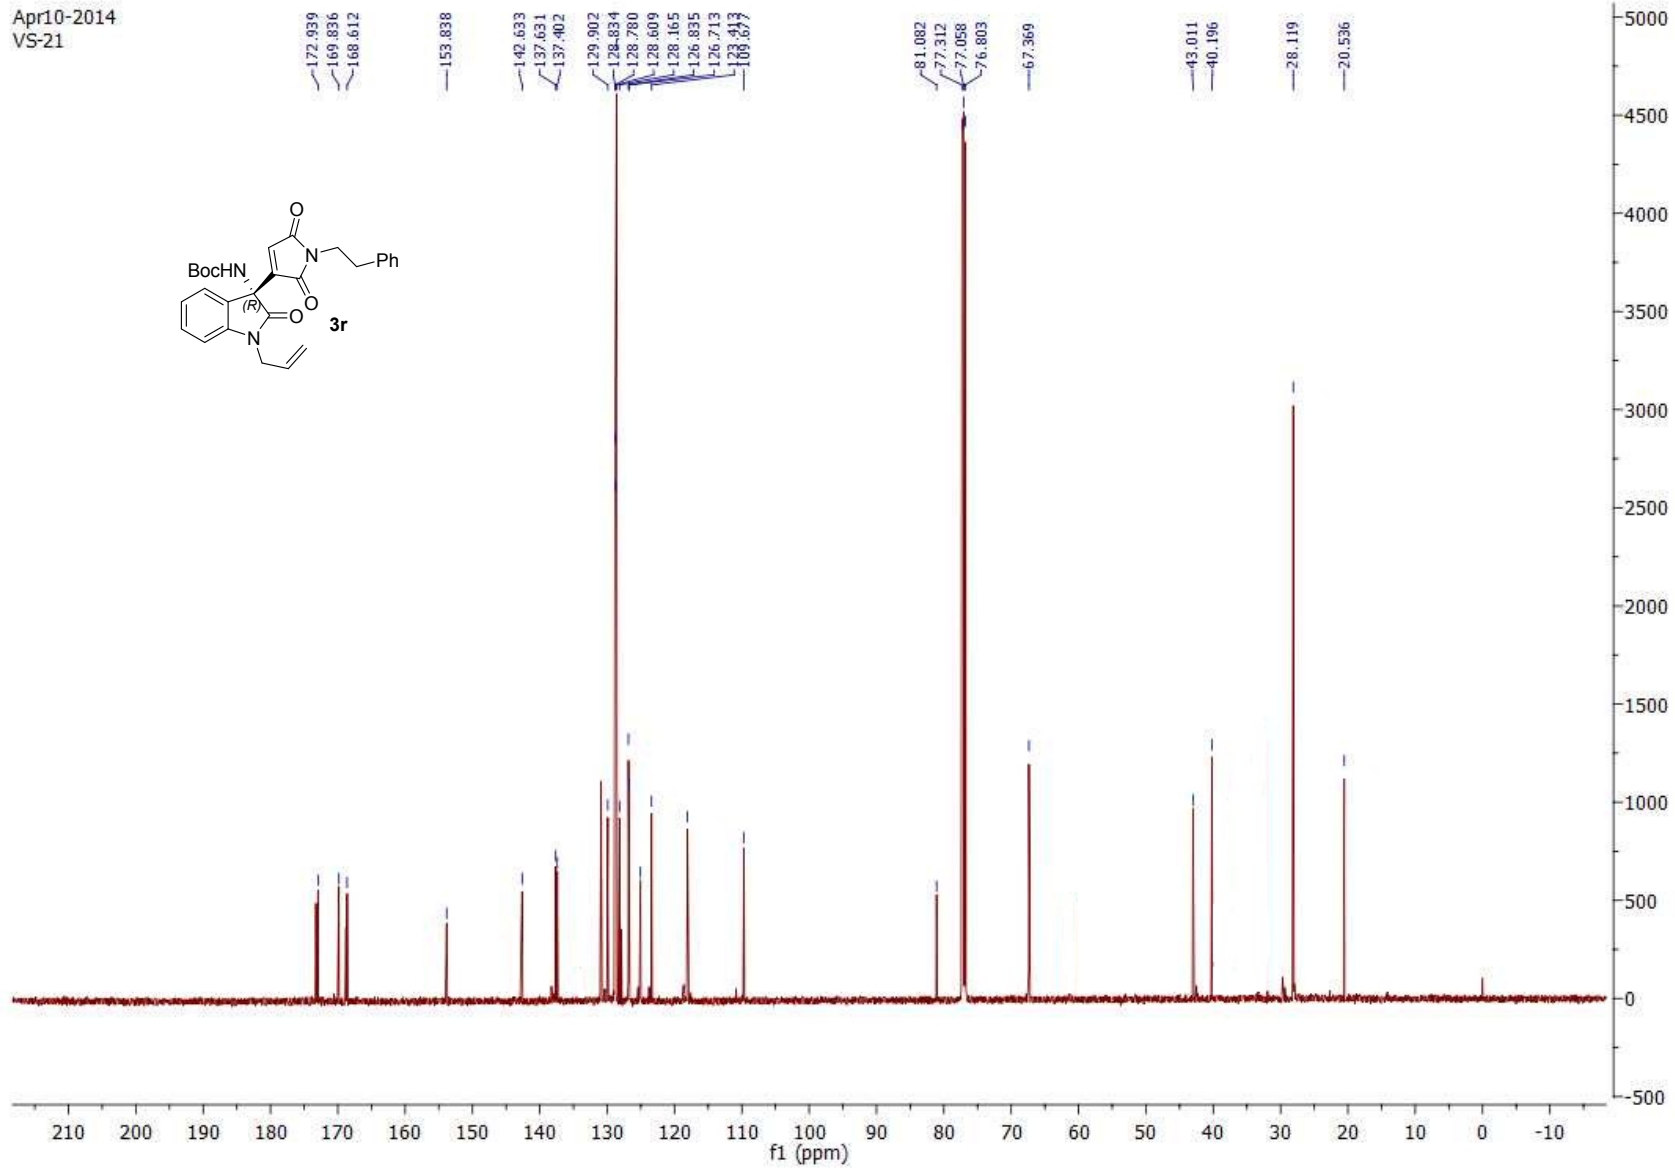

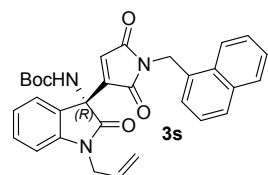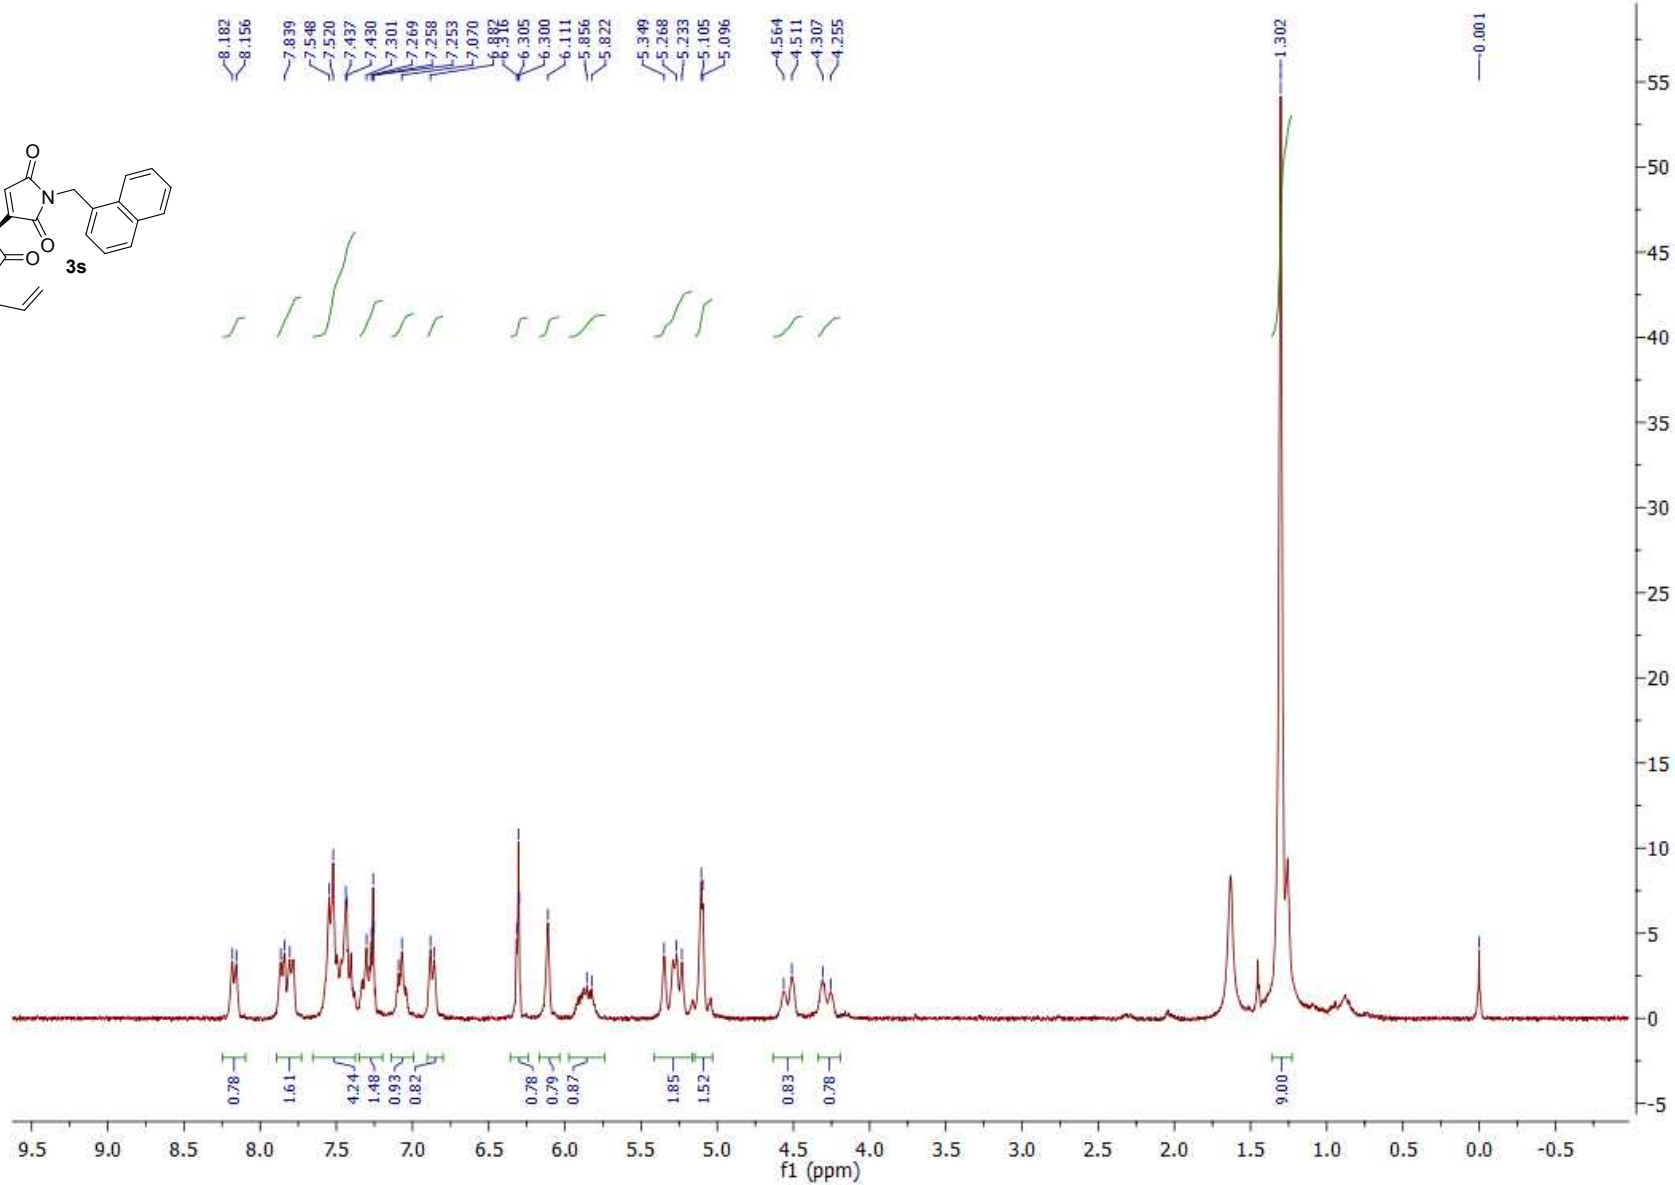

Mar28-2014  
VS-R-22

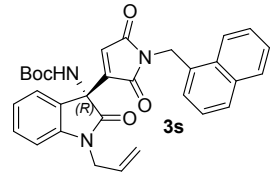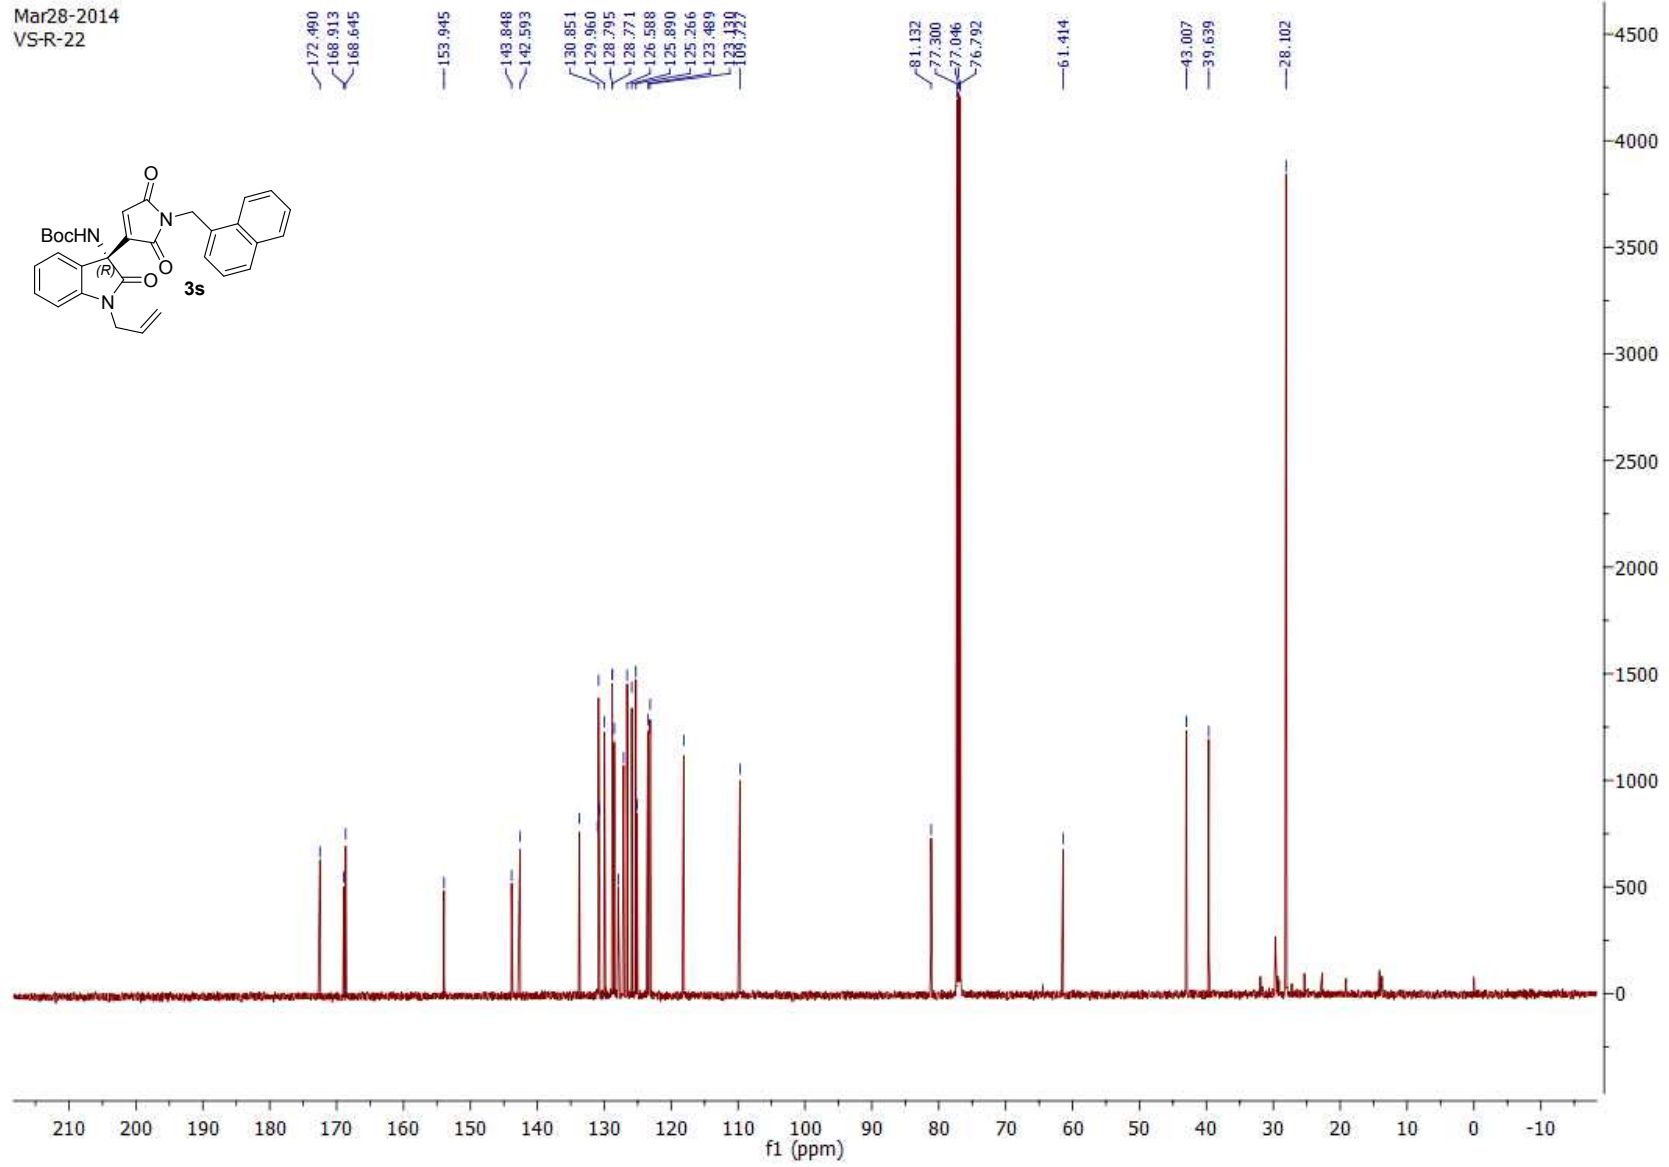

Supplement: c5ob00182j1.pdf [file c5ob00182j1.pdf]
